# Supplementary material for: Nudix hydrolase 1 is a prognostic biomarker in hepatocellular carcinoma
Source: Aging (Albany NY). 2020 Apr 27;12(8):7363–79. doi: 10.18632/aging.103083 (PMC7202498; doi:10.18632/aging.103083)
Supplement: Supplementary Table 4 [file aging-12-103083-s001..xlsx]

## Sheet: GSEA_NUDT1_TCGA
Supplementary Table 4. GSEA for MSigDB pathways (KEGG, PID, REACTOME).
ID	Description	setSize	enrichmentScore	NES	pvalue	p.adjust	qvalues	rank	leading_edge	core_enrichment
REACTOME_CELL_CYCLE	REACTOME_CELL_CYCLE	REACTOME_CELL_CYCLE	80	0.357857	2.16649	0.00112108	0.0346511	0.0229731	949	tags=63%, list=37%, signal=41%	4605/991/898/332/11004/1058/11065/9212/9232/79019/5347/8331/55388/81620/220134/220134/27127/83540/9133/23594/9493/995/81930/55355/891/8318/9088/983/890/57405/57405/701/55143/1870/1870/4998/9837/699/993/1869/4751/10112/990/10403/54821/147841/2491/143471/11339/6241/4171/11130/1029
REACTOME_CELL_CYCLE_MITOTIC	REACTOME_CELL_CYCLE_MITOTIC	REACTOME_CELL_CYCLE_MITOTIC	68	0.399858	2.32339	0.00114943	0.0346511	0.0229731	949	tags=69%, list=37%, signal=45%	4605/991/898/332/11004/1058/11065/9212/9232/79019/5347/55388/81620/220134/220134/83540/9133/23594/9493/995/81930/891/8318/9088/983/890/57405/57405/701/55143/1870/1870/4998/9837/699/993/1869/4751/10112/990/10403/54821/147841/2491/143471/6241/4171/11130/1029
REACTOME_MITOTIC_M_M_G1_PHASES	REACTOME_MITOTIC_M_M_G1_PHASES	REACTOME_MITOTIC_M_M_G1_PHASES	43	0.432656	2.22064	0.0012285	0.0346511	0.0229731	948	tags=74%, list=37%, signal=48%	991/332/11004/1058/9212/79019/5347/55388/81620/220134/220134/83540/23594/9493/81930/8318/57405/57405/701/55143/1870/1870/4998/699/1869/10112/990/10403/54821/147841/2491/143471/4171/11130
REACTOME_DNA_REPLICATION	REACTOME_DNA_REPLICATION	REACTOME_DNA_REPLICATION	49	0.391534	2.0962	0.00243013	0.0346511	0.0229731	948	tags=69%, list=37%, signal=45%	991/332/11004/1058/9212/79019/5347/55388/81620/220134/220134/83540/23594/9493/81930/8318/890/57405/57405/701/55143/1870/1870/4998/9837/699/1869/10112/990/10403/54821/147841/2491/143471/4171/11130
KEGG_ADIPOCYTOKINE_SIGNALING_PATHWAY	KEGG_ADIPOCYTOKINE_SIGNALING_PATHWAY	KEGG_ADIPOCYTOKINE_SIGNALING_PATHWAY	10	-0.580725	-2.14608	0.00289017	0.0346511	0.0229731	476	tags=80%, list=19%, signal=65%	51703/6258/2538/9021/2180/23305/5105
KEGG_PEROXISOME	KEGG_PEROXISOME	KEGG_PEROXISOME	10	-0.750098	-2.772	0.00289017	0.0346511	0.0229731	651	tags=100%, list=25%, signal=75%	11001/847/6342/2053/54363/51703/1962/2180/23305
KEGG_VALINE_LEUCINE_AND_ISOLEUCINE_DEGRADATION	KEGG_VALINE_LEUCINE_AND_ISOLEUCINE_DEGRADATION	KEGG_VALINE_LEUCINE_AND_ISOLEUCINE_DEGRADATION	10	-0.608857	-2.25004	0.00289017	0.0346511	0.0229731	654	tags=90%, list=25%, signal=67%	594/10449/217/1962/36/18/4329/316
REACTOME_PPARA_ACTIVATES_GENE_EXPRESSION	REACTOME_PPARA_ACTIVATES_GENE_EXPRESSION	REACTOME_PPARA_ACTIVATES_GENE_EXPRESSION	10	-0.575118	-2.12536	0.00289017	0.0346511	0.0229731	654	tags=80%, list=25%, signal=60%	116519/6822/6095/211/2180/1579/1543
KEGG_TRYPTOPHAN_METABOLISM	KEGG_TRYPTOPHAN_METABOLISM	KEGG_TRYPTOPHAN_METABOLISM	13	-0.573001	-2.35993	0.00326797	0.0346511	0.0229731	583	tags=79%, list=23%, signal=61%	6999/6999/217/1962/8564/11185/316/51166/1543/1544
REACTOME_BILE_ACID_AND_BILE_SALT_METABOLISM	REACTOME_BILE_ACID_AND_BILE_SALT_METABOLISM	REACTOME_BILE_ACID_AND_BILE_SALT_METABOLISM	13	-0.576738	-2.37532	0.00326797	0.0346511	0.0229731	651	tags=93%, list=25%, signal=70%	11001/213/6342/6554/10998/8647/8647/6718/10599/1582/51302/28234
REACTOME_PHASE_II_CONJUGATION	REACTOME_PHASE_II_CONJUGATION	REACTOME_PHASE_II_CONJUGATION	17	-0.724539	-3.45407	0.00337838	0.0346511	0.0229731	507	tags=89%, list=20%, signal=72%	7365/6822/7364/2949/54659/4143/4837/10249/54658/54657/2944/27284/25830/10/1544
KEGG_COMPLEMENT_AND_COAGULATION_CASCADES	KEGG_COMPLEMENT_AND_COAGULATION_CASCADES	KEGG_COMPLEMENT_AND_COAGULATION_CASCADES	14	-0.752835	-3.22034	0.00340136	0.0346511	0.0229731	647	tags=100%, list=25%, signal=75%	2244/2243/1361/5648/3426/722/5340/2158/731/729/735/4153/730
KEGG_FATTY_ACID_METABOLISM	KEGG_FATTY_ACID_METABOLISM	KEGG_FATTY_ACID_METABOLISM	16	-0.750685	-3.50156	0.00340136	0.0346511	0.0229731	654	tags=100%, list=25%, signal=75%	10449/51703/217/33/1962/36/2180/124/130/23305/126/1579/284541/125/127
KEGG_STEROID_HORMONE_BIOSYNTHESIS	KEGG_STEROID_HORMONE_BIOSYNTHESIS	KEGG_STEROID_HORMONE_BIOSYNTHESIS	16	-0.626053	-2.92021	0.00340136	0.0346511	0.0229731	507	tags=82%, list=20%, signal=67%	7365/8630/7364/6716/54659/6718/54658/54657/3290/64816/1543/1576/1585
KEGG_TYROSINE_METABOLISM	KEGG_TYROSINE_METABOLISM	KEGG_TYROSINE_METABOLISM	15	-0.562431	-2.4786	0.00346021	0.0346511	0.0229731	493	tags=80%, list=19%, signal=65%	2954/6898/3242/7054/124/130/126/316/125/127/1621
KEGG_ARACHIDONIC_ACID_METABOLISM	KEGG_ARACHIDONIC_ACID_METABOLISM	KEGG_ARACHIDONIC_ACID_METABOLISM	19	-0.489664	-2.41925	0.00357143	0.0346511	0.0229731	1071	tags=89%, list=42%, signal=53%	247/124975/874/2882/123745/8529/2053/5743/5740/1555/1579/284541/1559/1571/1558/1557
REACTOME_CYTOCHROME_P450_ARRANGED_BY_SUBSTRATE_TYPE	REACTOME_CYTOCHROME_P450_ARRANGED_BY_SUBSTRATE_TYPE	REACTOME_CYTOCHROME_P450_ARRANGED_BY_SUBSTRATE_TYPE	20	-0.724233	-3.70568	0.00362319	0.0346511	0.0229731	268	tags=75%, list=10%, signal=68%	1555/1579/1582/1559/64816/1571/51302/1558/1543/1576/1557/1544/1592/1585
KEGG_CELL_CYCLE	KEGG_CELL_CYCLE	KEGG_CELL_CYCLE	36	0.410592	2.00535	0.00372208	0.0346511	0.0229731	766	tags=62%, list=30%, signal=44%	991/898/9232/5347/7272/27127/9133/23594/995/891/8318/9088/983/890/701/1870/1870/4998/2810/699/993/1869/990
REACTOME_INNATE_IMMUNE_SYSTEM	REACTOME_INNATE_IMMUNE_SYSTEM	REACTOME_INNATE_IMMUNE_SYSTEM	23	-0.49389	-2.65908	0.00381679	0.0346511	0.0229731	524	tags=67%, list=20%, signal=54%	400830/3426/722/10878/731/1668/1668/729/54941/735/4153/6283/2353/730/6288
KEGG_METABOLISM_OF_XENOBIOTICS_BY_CYTOCHROME_P450	KEGG_METABOLISM_OF_XENOBIOTICS_BY_CYTOCHROME_P450	KEGG_METABOLISM_OF_XENOBIOTICS_BY_CYTOCHROME_P450	27	-0.643907	-3.72301	0.00406504	0.0346511	0.0229731	507	tags=86%, list=20%, signal=70%	7365/220/2954/7364/2949/54659/124/130/1555/54658/54657/126/2944/1559/64816/1571/125/127/1558/1543/1576/1557/1544
KEGG_RETINOL_METABOLISM	KEGG_RETINOL_METABOLISM	KEGG_RETINOL_METABOLISM	28	-0.702116	-4.16765	0.00421941	0.0346511	0.0229731	507	tags=86%, list=20%, signal=70%	7365/7364/5959/54659/124/130/8608/1555/54658/54657/126/1579/284541/1559/64816/9227/125/127/1558/1543/1576/1557/1544/1592
KEGG_DRUG_METABOLISM_CYTOCHROME_P450	KEGG_DRUG_METABOLISM_CYTOCHROME_P450	KEGG_DRUG_METABOLISM_CYTOCHROME_P450	31	-0.625626	-3.84147	0.00454545	0.0346511	0.0229731	507	tags=81%, list=20%, signal=66%	7365/220/2954/2327/7364/2949/54659/124/130/2328/1555/54658/54657/126/2944/1559/316/64816/1571/125/127/1558/1576/1557/1544
REACTOME_PHASE1_FUNCTIONALIZATION_OF_COMPOUNDS	REACTOME_PHASE1_FUNCTIONALIZATION_OF_COMPOUNDS	REACTOME_PHASE1_FUNCTIONALIZATION_OF_COMPOUNDS	31	-0.68171	-4.18584	0.00454545	0.0346511	0.0229731	302	tags=71%, list=12%, signal=63%	5743/5740/130/2328/1555/126/1579/1582/1559/64816/1571/125/127/51302/1558/1543/1576/1557/1544/1592/1585
NABA_ECM_AFFILIATED	NABA_ECM_AFFILIATED	NABA_ECM_AFFILIATED	34	-0.338468	-2.12478	0.00492611	0.0346511	0.0229731	25	tags=26%, list=1%, signal=27%	5068/4153/10584/8547/2220/339390/51266/10332
REACTOME_METABOLISM_OF_AMINO_ACIDS_AND_DERIVATIVES	REACTOME_METABOLISM_OF_AMINO_ACIDS_AND_DERIVATIVES	REACTOME_METABOLISM_OF_AMINO_ACIDS_AND_DERIVATIVES	39	-0.414351	-2.74692	0.00526316	0.0346511	0.0229731	650	tags=70%, list=25%, signal=53%	5053/5009/6999/6999/3626/51380/54363/2954/10157/2752/4942/389434/635/36/6898/27165/131669/3242/64902/4329/7054/8564/4143/51166/1491/5122/1621
PID_PLK1_PATHWAY	PID_PLK1_PATHWAY	PID_PLK1_PATHWAY	19	0.484206	1.91731	0.00554017	0.0346511	0.0229731	1035	tags=84%, list=40%, signal=51%	991/5347/995/891/983/701/699/10112/10403/54821/22974/147841/63967/9055/1062/1894
PID_AURORA_B_PATHWAY	PID_AURORA_B_PATHWAY	PID_AURORA_B_PATHWAY	14	0.553255	1.9683	0.00564972	0.0346511	0.0229731	768	tags=79%, list=30%, signal=55%	332/11004/1058/9212/9493/64151/55143/23397/699/10112/10403
REACTOME_BIOLOGICAL_OXIDATIONS	REACTOME_BIOLOGICAL_OXIDATIONS	REACTOME_BIOLOGICAL_OXIDATIONS	47	-0.676969	-5.02497	0.00571429	0.0346511	0.0229731	520	tags=83%, list=20%, signal=68%	7365/7365/6822/217/2327/7364/2949/54659/124/4143/5743/5740/130/4837/2328/10249/1555/54658/54657/126/1579/1582/2944/27284/1559/64816/25830/1571/125/127/51302/1558/1543/10/1576/1557/1544/1592/1585
KEGG_INSULIN_SIGNALING_PATHWAY	KEGG_INSULIN_SIGNALING_PATHWAY	KEGG_INSULIN_SIGNALING_PATHWAY	10	-0.560269	-2.07049	0.00578035	0.0346511	0.0229731	427	tags=82%, list=17%, signal=69%	79660/79660/2538/9021/2308/8835/5105/2998
KEGG_STARCH_AND_SUCROSE_METABOLISM	KEGG_STARCH_AND_SUCROSE_METABOLISM	KEGG_STARCH_AND_SUCROSE_METABOLISM	10	-0.548915	-2.02852	0.00578035	0.0346511	0.0229731	507	tags=82%, list=20%, signal=66%	7365/11181/2538/7364/54659/54658/54657/2998
REACTOME_REGULATION_OF_MITOTIC_CELL_CYCLE	REACTOME_REGULATION_OF_MITOTIC_CELL_CYCLE	REACTOME_REGULATION_OF_MITOTIC_CELL_CYCLE	11	0.603102	1.95397	0.00593472	0.0346511	0.0229731	660	tags=82%, list=26%, signal=61%	991/11065/9212/9232/5347/891/983/890/701
REACTOME_METABOLISM_OF_LIPIDS_AND_LIPOPROTEINS	REACTOME_METABOLISM_OF_LIPIDS_AND_LIPOPROTEINS	REACTOME_METABOLISM_OF_LIPIDS_AND_LIPOPROTEINS	62	-0.279496	-2.21662	0.00671141	0.0361191	0.0239464	756	tags=61%, list=29%, signal=44%	79888/340075/9468/34/23600/11001/2819/213/6342/116519/6822/51703/6095/33/6554/6716/10998/8647/8647/211/1071/6718/5346/2180/10599/80765/23305/4018/3931/1579/1582/3290/9227/51302/1543/28234/125981/1585
REACTOME_MITOTIC_G1_G1_S_PHASES	REACTOME_MITOTIC_G1_G1_S_PHASES	REACTOME_MITOTIC_G1_G1_S_PHASES	25	0.436402	1.88794	0.00674764	0.0361191	0.0239464	949	tags=73%, list=37%, signal=47%	4605/898/55388/81620/23594/891/8318/9088/983/890/1870/1870/4998/993/1869/990/6241/4171/1029
KEGG_DRUG_METABOLISM_OTHER_ENZYMES	KEGG_DRUG_METABOLISM_OTHER_ENZYMES	KEGG_DRUG_METABOLISM_OTHER_ENZYMES	14	-0.509852	-2.18095	0.00680272	0.0361191	0.0239464	545	tags=75%, list=21%, signal=59%	7365/7365/7364/54659/221223/221223/54658/54657/64816/10/1576
KEGG_PPAR_SIGNALING_PATHWAY	KEGG_PPAR_SIGNALING_PATHWAY	KEGG_PPAR_SIGNALING_PATHWAY	21	-0.44179	-2.29375	0.00716846	0.0361191	0.0239464	654	tags=76%, list=25%, signal=57%	11001/6342/116519/51703/6258/33/1962/10998/5346/2180/23305/1579/1582/5105/284541
REACTOME_MITOTIC_G2_G2_M_PHASES	REACTOME_MITOTIC_G2_G2_M_PHASES	REACTOME_MITOTIC_G2_G2_M_PHASES	13	0.548829	1.8839	0.00718391	0.0361191	0.0239464	735	tags=77%, list=29%, signal=55%	5347/9133/995/891/9088/983/890/993/1869/4751
REACTOME_CELL_JUNCTION_ORGANIZATION	REACTOME_CELL_JUNCTION_ORGANIZATION	REACTOME_CELL_JUNCTION_ORGANIZATION	11	0.595198	1.92836	0.0074184	0.03629	0.0240597	204	tags=45%, list=8%, signal=42%	1008/1016/1007/51208/1010
REACTOME_CELL_CELL_JUNCTION_ORGANIZATION	REACTOME_CELL_CELL_JUNCTION_ORGANIZATION	REACTOME_CELL_CELL_JUNCTION_ORGANIZATION	10	0.636676	1.96822	0.00762195	0.0363046	0.0240693	204	tags=50%, list=8%, signal=46%	1008/1016/1007/51208/1010
REACTOME_MITOTIC_PROMETAPHASE	REACTOME_MITOTIC_PROMETAPHASE	REACTOME_MITOTIC_PROMETAPHASE	27	0.421539	1.86927	0.00793651	0.0368335	0.02442	1095	tags=79%, list=43%, signal=46%	991/332/11004/1058/9212/79019/5347/220134/220134/83540/81930/57405/57405/701/55143/699/10403/54821/147841/2491/11130/4085/64105
NABA_SECRETED_FACTORS	NABA_SECRETED_FACTORS	NABA_SECRETED_FACTORS	74	-0.306355	-2.43878	0.00826446	0.0373658	0.0247729	194	tags=24%, list=8%, signal=23%	6368/7476/7472/9547/6387/5473/6283/1440/83854/4908/8074/147372/140689/64399/1393/2658/27302/723961/723961
REACTOME_E2F_MEDIATED_REGULATION_OF_DNA_REPLICATION	REACTOME_E2F_MEDIATED_REGULATION_OF_DNA_REPLICATION	REACTOME_E2F_MEDIATED_REGULATION_OF_DNA_REPLICATION	13	0.537404	1.84468	0.00862069	0.0373658	0.0247729	921	tags=85%, list=36%, signal=55%	898/81620/23594/891/8318/983/4998/993/1869/990/6241
REACTOME_AMINE_LIGAND_BINDING_RECEPTORS	REACTOME_AMINE_LIGAND_BINDING_RECEPTORS	REACTOME_AMINE_LIGAND_BINDING_RECEPTORS	10	-0.52312	-1.9332	0.00867052	0.0373658	0.0247729	289	tags=60%, list=11%, signal=53%	147/3357/1812/148/1129
REACTOME_G1_S_TRANSITION	REACTOME_G1_S_TRANSITION	REACTOME_G1_S_TRANSITION	20	0.45492	1.82396	0.0110193	0.0463835	0.0307515	946	tags=75%, list=37%, signal=48%	898/55388/81620/23594/891/8318/9088/983/890/4998/993/1869/990/6241/4171
REACTOME_RESPONSE_TO_ELEVATED_PLATELET_CYTOSOLIC_CA2_	REACTOME_RESPONSE_TO_ELEVATED_PLATELET_CYTOSOLIC_CA2_	REACTOME_RESPONSE_TO_ELEVATED_PLATELET_CYTOSOLIC_CA2_	11	-0.505923	-1.91565	0.0121951	0.0501663	0.0332594	856	tags=83%, list=33%, signal=56%	226/2244/2243/213/7057/22915/5340/88/5473
NABA_MATRISOME_ASSOCIATED	NABA_MATRISOME_ASSOCIATED	NABA_MATRISOME_ASSOCIATED	162	-0.207421	-1.96153	0.012987	0.0514351	0.0341006	284	tags=21%, list=11%, signal=20%	25891/4225/11093/11093/4018/2158/114899/5068/6368/6368/7476/7472/9547/4153/6387/5473/6283/1440/83854/4908/8074/147372/140689/64399/5858/10584/8547/2220/1393/339390/2658/51266/10332/27302/723961/723961
KEGG_VASCULAR_SMOOTH_MUSCLE_CONTRACTION	KEGG_VASCULAR_SMOOTH_MUSCLE_CONTRACTION	KEGG_VASCULAR_SMOOTH_MUSCLE_CONTRACTION	13	-0.494333	-2.03593	0.0130719	0.0514351	0.0341006	195	tags=46%, list=8%, signal=43%	147/284541/552/114/148
REACTOME_CELL_CYCLE_CHECKPOINTS	REACTOME_CELL_CYCLE_CHECKPOINTS	REACTOME_CELL_CYCLE_CHECKPOINTS	23	0.412594	1.73238	0.0135135	0.0520414	0.0345026	946	tags=70%, list=37%, signal=44%	991/898/11065/55388/9133/23594/995/891/8318/983/701/4998/993/990/143471/4171
REACTOME_FATTY_ACID_TRIACYLGLYCEROL_AND_KETONE_BODY_METABOLISM	REACTOME_FATTY_ACID_TRIACYLGLYCEROL_AND_KETONE_BODY_METABOLISM	REACTOME_FATTY_ACID_TRIACYLGLYCEROL_AND_KETONE_BODY_METABOLISM	19	-0.371078	-1.83336	0.0142857	0.053869	0.0357143	756	tags=70%, list=29%, signal=50%	79888/34/2819/116519/6822/51703/6095/33/211/2180/23305/1579/1543
NABA_ECM_GLYCOPROTEINS	NABA_ECM_GLYCOPROTEINS	NABA_ECM_GLYCOPROTEINS	45	-0.236907	-1.71024	0.0170455	0.0629638	0.041744	591	tags=55%, list=23%, signal=43%	2243/8406/4239/3484/7057/3491/1842/22915/1805/8404/9211/79987/7148/7148/7148/7148/7148/7148/7148/7148/1893/7783/7783/3483/170392/340419/84870/168667
KEGG_SYSTEMIC_LUPUS_ERYTHEMATOSUS	KEGG_SYSTEMIC_LUPUS_ERYTHEMATOSUS	KEGG_SYSTEMIC_LUPUS_ERYTHEMATOSUS	18	-0.373541	-1.79817	0.0177305	0.0641844	0.0425532	1412	tags=95%, list=55%, signal=43%	128312/2903/92815/92815/3014/8346/2209/8352/8360/8354/8335/3015/2904/731/729/88/735/730
REACTOME_G1_S_SPECIFIC_TRANSCRIPTION	REACTOME_G1_S_SPECIFIC_TRANSCRIPTION	REACTOME_G1_S_SPECIFIC_TRANSCRIPTION	10	0.5692	1.75963	0.0182927	0.0649211	0.0430416	921	tags=90%, list=36%, signal=58%	898/81620/8318/983/4998/993/1869/990/6241
KEGG_CALCIUM_SIGNALING_PATHWAY	KEGG_CALCIUM_SIGNALING_PATHWAY	KEGG_CALCIUM_SIGNALING_PATHWAY	33	-0.278694	-1.74691	0.0187793	0.0653666	0.0433369	273	tags=33%, list=11%, signal=30%	8911/147/552/2925/3357/1812/22953/114/148/1129
REACTOME_CELL_CELL_COMMUNICATION	REACTOME_CELL_CELL_COMMUNICATION	REACTOME_CELL_CELL_COMMUNICATION	17	0.466588	1.76968	0.01983	0.0665791	0.0441408	252	tags=35%, list=10%, signal=32%	1008/1016/1007/51208/1010/84063
KEGG_PORPHYRIN_AND_CHLOROPHYLL_METABOLISM	KEGG_PORPHYRIN_AND_CHLOROPHYLL_METABOLISM	KEGG_PORPHYRIN_AND_CHLOROPHYLL_METABOLISM	10	-0.502886	-1.85842	0.0202312	0.0665791	0.0441408	771	tags=91%, list=30%, signal=64%	644/212/7365/7365/7364/54659/211/54658/54657
REACTOME_SIGNALING_BY_ERBB4	REACTOME_SIGNALING_BY_ERBB4	REACTOME_SIGNALING_BY_ERBB4	10	-0.485019	-1.79239	0.0202312	0.0665791	0.0441408	299	tags=64%, list=12%, signal=56%	1447/1447/3164/2690/6387/2099
REACTOME_CYTOKINE_SIGNALING_IN_IMMUNE_SYSTEM	REACTOME_CYTOKINE_SIGNALING_IN_IMMUNE_SYSTEM	REACTOME_CYTOKINE_SIGNALING_IN_IMMUNE_SYSTEM	18	-0.363513	-1.7499	0.0212766	0.068769	0.0455927	1083	tags=83%, list=42%, signal=49%	3552/2209/3561/3838/51191/54739/3434/3557/9021/4684/2690/8835/1958/4502
NABA_MATRISOME	NABA_MATRISOME	NABA_MATRISOME	222	-0.200836	-2.11558	0.0243902	0.0774497	0.0513479	284	tags=23%, list=11%, signal=23%	25891/9211/4225/79987/11093/11093/7148/7148/7148/7148/7148/7148/7148/7148/4018/2158/114899/5068/1893/6368/6368/7783/7783/7476/7472/1634/9547/4153/6387/3483/5473/6283/1440/83854/4908/131873/170392/84570/8074/147372/340419/140689/84870/64399/5858/10584/8547/168667/2220/1393/339390/2658/51266/10332/27302/723961/723961
KEGG_GLYCOLYSIS_GLUCONEOGENESIS	KEGG_GLYCOLYSIS_GLUCONEOGENESIS	KEGG_GLYCOLYSIS_GLUCONEOGENESIS	18	-0.34596	-1.6654	0.0248227	0.0774639	0.0513573	493	tags=53%, list=19%, signal=43%	217/2203/2538/124/130/126/5105/125/127
REACTOME_METABOLISM_OF_CARBOHYDRATES	REACTOME_METABOLISM_OF_CARBOHYDRATES	REACTOME_METABOLISM_OF_CARBOHYDRATES	35	-0.271171	-1.71231	0.0263158	0.0799117	0.0529801	505	tags=42%, list=20%, signal=34%	6514/9953/2203/11181/2538/10402/4958/10090/5105/1634/2998/10894/9348/55576
NABA_CORE_MATRISOME	NABA_CORE_MATRISOME	NABA_CORE_MATRISOME	60	-0.206475	-1.6118	0.0264901	0.0799117	0.0529801	916	tags=65%, list=36%, signal=43%	1302/1302/1302/1302/1302/1302/1302/8785/6696/284217/343637/84628/1833/2244/2243/8406/4239/3484/4969/7057/3491/1842/4958/22915/1805/8404/9211/79987/7148/7148/7148/7148/7148/7148/7148/7148/1893/7783/7783/1634/3483/131873/170392/84570/340419/84870/168667
KEGG_OOCYTE_MEIOSIS	KEGG_OOCYTE_MEIOSIS	KEGG_OOCYTE_MEIOSIS	20	0.413393	1.65746	0.0316804	0.0940026	0.0623222	719	tags=57%, list=28%, signal=42%	63928/991/898/9232/5347/27127/9133/995/891/9088/983/699
REACTOME_GLYCOSAMINOGLYCAN_METABOLISM	REACTOME_GLYCOSAMINOGLYCAN_METABOLISM	REACTOME_GLYCOSAMINOGLYCAN_METABOLISM	21	-0.31045	-1.61184	0.0322581	0.0941727	0.062435	505	tags=43%, list=20%, signal=35%	9953/10402/4958/10090/1634/10894/9348/55576
REACTOME_KINESINS	REACTOME_KINESINS	REACTOME_KINESINS	13	0.480768	1.65027	0.033046	0.0949416	0.0629447	756	tags=76%, list=29%, signal=54%	147700/11004/24137/3798/9493/81930/3833/3833/3833/3833/56992/56992/10112
