# Supplementary material for: Nudix hydrolase 1 is a prognostic biomarker in hepatocellular carcinoma
Source: Aging (Albany NY). 2020 Apr 27;12(8):7363–79. doi: 10.18632/aging.103083 (PMC7202498; doi:10.18632/aging.103083)
Supplement: Supplementary Table 5 [file aging-12-103083-s003..xlsx]

## Sheet: GO_NUDT1
Supplementary Table 5. Gene ontology (GO) enrichment analysis.
ONTOLOGY	ID	Description	GeneRatio	BgRatio	pvalue	p.adjust	qvalue	geneID	Count
GO:0000280	BP	GO:0000280	nuclear division	95/2038	416/18493	2.52669e-12	1.38607e-08	1.18626e-08	676/56154/655/4605/56776/991/898/11004/11065/9212/9232/9319/5347/81620/146909/7272/24137/83540/56159/9133/9493/113130/995/81930/891/3833/147872/146956/64151/9088/890/5888/701/54443/400629/55143/9787/23397/699/4751/84944/7153/990/10403/79616/4288/22974/27338/2177/1063/10460/11130/9055/3832/1062/54514/84057/641/4085/56979/10309/56603/1761/2069/899/51203/347688/259266/158401/225689/9928/286151/1164/…	95
GO:0003002	BP	GO:0003002	regionalization	82/2038	341/18493	4.90297e-12	1.38607e-08	1.18626e-08	8092/5308/10736/163589/6496/3227/2302/64399/3229/3226/3237/4821/134701/3219/1045/3207/10683/221833/57057/1482/7477/3223/10655/58495/56033/22943/3239/3975/389549/3225/7472/7476/5013/9350/1746/1745/57216/3670/7516/3224/5992/3218/2019/25806/10371/1959/3222/3233/2297/3221/6656/367/56603/84667/429/3217/6422/3236/25928/3204/2128/64388/4010/145873/4188/57453/4909/153572/4300/2253/2637/58524/8022/92129/6…	82
GO:0007389	BP	GO:0007389	pattern specification process	96/2038	434/18493	1.34939e-11	2.54314e-08	2.17654e-08	8092/5308/10736/163589/6496/3227/2302/64399/3229/3226/3237/655/4821/134701/3219/10660/579/1045/2138/3207/10683/221833/57057/2348/1482/7477/3223/10655/58495/56033/22943/3239/3975/389549/3225/7472/199699/7476/5013/9350/1746/1745/57216/10637/3670/7516/3224/5992/3218/2019/25806/10371/1959/3222/3233/2297/3221/6656/367/56603/653/84667/429/3217/6422/3236/25928/6491/3204/2128/64388/4010/145873/4188/57453…	96
GO:0006805	BP	GO:0006805	xenobiotic metabolic process	40/2038	117/18493	2.16349e-11	3.05809e-08	2.61725e-08	1592/1544/1557/54575/1576/10/1543/1558/1571/54905/6283/1559/27284/2944/54657/54658/2690/1555/6770/2902/10249/2328/2180/56603/54659/6716/2327/9915/2326/6095/874/51380/4025/2053/22977/1728/13/54577/5446/8856	40
GO:0009410	BP	GO:0009410	response to xenobiotic stimulus	70/2038	282/18493	3.86879e-11	4.37483e-08	3.74418e-08	1393/1592/1544/1557/54575/1576/10/1543/84152/2354/1621/1558/1812/6870/3359/1571/54905/6283/2775/1813/890/1268/1559/1869/27284/2944/1958/5105/54657/54658/2690/1555/6770/2902/10249/2328/4929/2308/5138/7054/5582/2180/56603/18/54659/2903/3208/5309/6716/1723/4176/2327/9915/6863/2326/2056/6095/26050/27092/874/51380/4025/2053/22977/1728/6999/13/54577/5446/8856	70
GO:0048285	BP	GO:0048285	organelle fission	98/2038	458/18493	6.05735e-11	5.70804e-08	4.8852e-08	676/56154/655/4605/56776/991/898/11004/11065/9212/9232/9319/5347/81620/146909/7272/24137/113115/83540/56159/9133/9493/113130/995/81930/891/3833/147872/146956/64151/9088/890/1634/5888/701/54443/400629/55143/9787/23397/699/4751/84944/7153/990/10403/79616/4288/22974/27338/2177/1063/10460/11130/9055/3832/1062/54514/84057/641/4085/56979/10309/56603/1761/2069/899/51203/347688/259266/158401/1723/225689/…	98
GO:0098813	BP	GO:0098813	nuclear chromosome segregation	65/2038	258/18493	9.76568e-11	7.88788e-08	6.7508e-08	56154/56776/991/898/11004/9212/9232/9319/5347/81620/146909/7272/24137/27127/83540/56159/9493/113130/81930/891/3833/147872/146956/64151/701/55143/9787/23397/699/4751/84944/7153/990/10403/2177/1063/116028/10460/11130/9055/1062/1894/641/4085/51203/158401/225689/9928/157570/11144/29127/285643/8555/10615/339834/164045/10609/254528/84722/2237/9918/54908/79075/1843/9700	65
GO:0048562	BP	GO:0048562	embryonic organ morphogenesis	69/2038	284/18493	1.48118e-10	1.04683e-07	8.95921e-08	1280/8092/10736/6496/3227/124590/84189/3167/655/10660/579/2138/3207/57057/6474/340784/2348/1482/58495/1750/3975/3225/1749/5013/1746/57216/6664/55584/5456/64220/7020/8013/3218/53904/25806/4522/3233/3221/7054/51761/79955/668/3217/4237/3236/6491/2535/3204/2254/4188/57453/5754/2253/115908/2295/2637/220/219736/10804/525/5076/6943/257/4323/286204/6926/2299/116039/55897	69
GO:0007059	BP	GO:0007059	chromosome segregation	73/2038	312/18493	2.76226e-10	1.73531e-07	1.48516e-07	56154/56776/991/898/332/11004/9212/9232/9319/5347/81620/146909/220134/7272/24137/27127/83540/56159/9493/113130/81930/387103/55355/891/3833/147872/146956/64151/221150/57405/701/55143/9787/23397/699/4751/84944/7153/990/10403/4288/2177/1063/116028/11339/10460/11130/9055/1062/1894/641/4085/51203/158401/225689/9928/157570/11144/29127/285643/8555/10615/339834/164045/10609/254528/84722/2237/9918/54908/7…	73
GO:0071466	BP	GO:0071466	cellular response to xenobiotic stimulus	48/2038	171/18493	5.77404e-10	3.26464e-07	2.79403e-07	1393/1592/1544/1557/54575/1576/10/1543/1558/1571/54905/6283/890/1559/1869/27284/2944/1958/5105/54657/54658/2690/1555/6770/2902/10249/2328/2308/5138/2180/56603/54659/6716/4176/2327/9915/2326/6095/874/51380/4025/2053/22977/1728/13/54577/5446/8856	48
GO:0051321	BP	GO:0051321	meiotic cell cycle	61/2038	249/18493	1.20634e-09	6.20057e-07	5.30673e-07	676/56154/56776/991/898/9232/9319/5347/8438/51207/7272/27127/83540/66037/56159/995/81930/147872/146956/9088/5888/701/400629/23397/699/993/4751/84944/9156/7153/171482/7516/2177/54514/84057/641/56979/56603/1761/2069/347688/259266/158401/225689/286151/283677/1164/11144/3014/440822/994/339834/164045/10609/254528/29893/91646/9918/55329/1843/9700	61
GO:0048665	BP	GO:0048665	neuron fate specification	18/2038	34/18493	2.06792e-09	9.74337e-07	8.33881e-07	167826/3226/64843/4821/10660/2138/3110/54845/3670/5454/6656/429/3236/2128/58524/8022/54738/4916	18
GO:0140014	BP	GO:0140014	mitotic nuclear division	65/2038	277/18493	2.29834e-09	9.99599e-07	8.55502e-07	655/4605/991/898/11004/11065/9212/9232/9319/5347/81620/146909/7272/24137/83540/9133/9493/113130/995/81930/891/3833/64151/9088/890/701/54443/55143/9787/23397/699/4751/990/10403/79616/4288/22974/27338/1063/10460/11130/9055/3832/1062/4085/10309/1761/2069/899/51203/9928/1111/29127/285643/8555/3552/9735/10615/2253/84722/9918/54908/79075/1843/9700	65
GO:0000819	BP	GO:0000819	sister chromatid segregation	49/2038	185/18493	3.28438e-09	1.32642e-06	1.13521e-06	991/11004/9212/9232/9319/5347/81620/146909/7272/24137/27127/83540/9493/113130/81930/891/3833/64151/701/55143/9787/23397/699/4751/7153/990/10403/1063/116028/10460/11130/9055/1062/4085/51203/225689/9928/157570/29127/285643/8555/10615/84722/2237/9918/54908/79075/1843/9700	49
GO:0000070	BP	GO:0000070	mitotic sister chromatid segregation	43/2038	153/18493	4.30348e-09	1.62213e-06	1.38829e-06	991/11004/9212/9232/9319/5347/81620/146909/7272/24137/83540/9493/113130/81930/891/3833/64151/701/55143/9787/23397/699/4751/990/10403/1063/10460/11130/9055/1062/4085/51203/9928/29127/285643/8555/10615/84722/9918/54908/79075/1843/9700	43
GO:0048568	BP	GO:0048568	embryonic organ development	87/2038	422/18493	4.88133e-09	1.72494e-06	1.47628e-06	1280/8092/10736/6496/3227/124590/84189/84870/3167/655/10660/579/1045/2138/3207/57057/6474/340784/2348/1482/7477/58495/1750/3975/3225/3880/7472/2020/1749/5013/1746/6692/57216/6664/7274/55584/5456/64220/7020/8013/3218/53904/2019/25806/4522/3233/3221/79733/10733/7054/113026/653/51761/79955/668/3217/4237/3236/9021/6491/10653/2535/3204/3491/2254/4188/57453/5754/144455/2253/115908/2295/2637/220/219736/…	87
GO:0010038	BP	GO:0010038	response to metal ion	77/2038	358/18493	5.41222e-09	1.80004e-06	1.54056e-06	4490/1393/1585/63928/4499/4496/1544/169026/4495/125981/341359/8074/645745/1543/7031/4494/2354/57817/2696/143425/90019/57586/4501/2353/3746/2539/8913/4493/891/4502/1813/983/7139/4521/22871/8437/7780/4489/6857/6770/366/3710/4318/7020/11093/1894/5743/6620/131034/7021/7054/18/429/3208/15/6898/6833/151835/2203/10243/3747/3552/9536/7057/6652/27094/1841/27132/1728/5009/10397/6569/847/2243/2244/1843/7222	77
GO:0051304	BP	GO:0051304	chromosome separation	30/2038	89/18493	9.84509e-09	3.09245e-06	2.64666e-06	991/9212/9232/9319/5347/81620/7272/56159/891/146956/701/9787/23397/699/7153/990/10403/1063/10460/1062/641/4085/158401/225689/164045/254528/9918/54908/1843/9700	30
GO:1903046	BP	GO:1903046	meiotic cell cycle process	48/2038	188/18493	1.70234e-08	5.06581e-06	4.33555e-06	676/56154/56776/991/898/9232/9319/5347/7272/83540/56159/995/81930/147872/146956/5888/701/400629/23397/699/993/84944/9156/7153/2177/54514/84057/641/56979/56603/1761/2069/347688/259266/158401/225689/286151/1164/11144/994/339834/164045/10609/254528/29893/91646/9918/9700	48
GO:0030900	BP	GO:0030900	forebrain development	77/2038	374/18493	3.94558e-08	1.11542e-05	9.54623e-06	190/5308/6496/6753/431707/8941/2044/4747/7477/50506/5307/1812/22943/3975/3746/389549/4852/284403/6387/23440/2775/1813/7301/552/7476/1869/1749/5013/1746/1745/3670/2902/10460/5456/170302/5992/8013/6657/25806/6513/7804/4929/6506/10371/5454/7054/6656/10215/27164/79633/10642/429/84879/4192/259266/2146/6491/6716/54407/2049/9928/57282/64211/2692/3014/89839/3747/26050/2253/2637/220/8022/4009/2173/6887/69…	77
GO:0042445	BP	GO:0042445	hormone metabolic process	52/2038	218/18493	5.08458e-08	1.33202e-05	1.14001e-05	1393/1585/174/1592/1576/2099/1543/83875/50506/127/5122/51083/5653/9227/405753/7038/27284/3290/1958/54658/2690/6770/5126/27344/50700/25825/56603/2834/653/6718/54659/5959/15/1588/6716/7364/2692/64577/3972/389434/8630/220/2028/6696/27120/59272/53905/54577/6528/5972/60482/5446	52
GO:0140013	BP	GO:0140013	meiotic nuclear division	44/2038	171/18493	5.18297e-08	1.33202e-05	1.14001e-05	676/56154/56776/991/898/9232/9319/5347/7272/83540/56159/81930/147872/146956/5888/701/400629/23397/699/84944/7153/2177/54514/84057/641/56979/56603/1761/2069/347688/259266/158401/225689/286151/1164/11144/994/339834/164045/10609/254528/29893/91646/9700	44
GO:0023061	BP	GO:0023061	signal release	88/2038	453/18493	7.30265e-08	1.79518e-05	1.5364e-05	1393/1113/1129/169026/3358/3623/341359/148/8074/2044/1394/4544/139760/9515/1946/2914/1812/2696/143425/90019/5798/23025/57586/2641/6755/51083/8618/26059/1813/222546/1268/22871/7476/27445/2922/6623/3589/114899/6664/3670/6857/2740/5030/3710/4828/6616/151/6513/2297/114131/7021/8564/5582/18/668/6422/6833/1588/2692/7425/6863/3747/134/133308/136/4602/2752/6514/55107/8448/3060/140730/9900/3767/440279/669…	88
GO:0042737	BP	GO:0042737	drug catabolic process	38/2038	140/18493	9.22856e-08	2.17409e-05	1.86069e-05	3046/1544/1557/1576/222/1621/1558/50506/1571/54905/259307/51166/1559/27284/3043/5105/3045/1555/3240/3042/5973/3242/6898/80150/3049/217/3040/10157/2954/54363/6822/4025/1807/53905/847/2329/8856/5053	38
GO:0043583	BP	GO:0043583	ear development	50/2038	210/18493	9.70957e-08	2.19592e-05	1.87936e-05	1280/168667/10736/124590/84189/55283/3167/579/3776/2138/340784/50506/1750/9547/890/1749/5013/54845/57216/55584/4171/5456/64220/7020/8013/6657/53904/653/79633/51761/79955/3208/2535/2254/65217/5754/2253/115908/2637/780/220/8022/219736/10804/525/5076/246213/2299/116039/4916	50
GO:0007218	BP	GO:0007218	neuropeptide signaling pathway	31/2038	103/18493	1.10824e-07	2.32073e-05	1.98618e-05	6753/11247/84634/339403/114815/6866/6755/51083/4852/2925/7301/2922/4886/22986/10887/4828/27344/53831/8001/4889/11251/10886/2834/2825/6863/3060/10874/5367/60675/6752/387129	31
GO:0051983	BP	GO:0051983	regulation of chromosome segregation	31/2038	103/18493	1.10824e-07	2.32073e-05	1.98618e-05	991/11004/9212/9232/9319/5347/81620/7272/113130/891/701/9787/699/4751/990/10403/4288/1063/116028/10460/1062/1894/4085/225689/29127/10615/339834/2237/54908/1843/9700	31
GO:0021517	BP	GO:0021517	ventral spinal cord development	19/2038	46/18493	1.27941e-07	2.58349e-05	2.21107e-05	167826/3226/64843/4821/10660/3110/57057/3975/3670/161357/6656/10215/429/3236/2128/58524/8022/387804/6659	19
GO:0006813	BP	GO:0006813	potassium ion transport	54/2038	238/18493	1.66774e-07	3.25152e-05	2.7828e-05	27133/51305/5349/27012/3776/170850/4544/3781/10021/1812/3757/51083/3746/6557/65268/219527/389816/3754/1813/89822/88/3780/495/57628/3752/23416/6616/480/56660/10060/54207/486/3769/3755/3773/6833/29850/440699/23630/6549/3747/134/3060/3767/27094/478/3792/3751/3785/3786/285335/27347/284525/389015	54
GO:0090596	BP	GO:0090596	sensory organ morphogenesis	56/2038	251/18493	1.80238e-07	3.39688e-05	2.9072e-05	1280/5308/10736/6496/124590/3229/256297/84189/3167/655/2792/579/2138/340784/118427/1750/3975/7472/1749/5013/57216/6664/55584/5456/64220/7020/8013/53904/25806/7021/7054/6656/56603/51761/79955/668/5309/4237/1826/2301/2535/8842/2254/5754/2253/115908/2295/2637/220/219736/10804/525/5076/793/2299/116039	56
GO:0021953	BP	GO:0021953	central nervous system neuron differentiation	43/2038	175/18493	2.96785e-07	4.96318e-05	4.24772e-05	167826/431707/3226/64843/4821/10660/2895/3110/57057/1812/22943/3975/4852/23440/1813/7472/7476/1749/1746/1745/3670/5456/170302/161357/4929/10371/6656/10215/27164/429/6422/3236/2049/57282/2128/64211/6095/2253/2637/58524/8022/4009/6659	43
GO:0048736	BP	GO:0048736	appendage development	43/2038	175/18493	2.96785e-07	4.96318e-05	4.24772e-05	1280/8092/5308/3227/3229/3226/2249/340419/655/3207/221833/6474/5307/22943/1750/3239/8456/7476/1749/6664/80144/79412/7020/2019/3691/7021/56603/27164/4621/494470/3236/2254/57167/1311/9496/642658/2253/343637/2719/257/6926/6659/116039	43
GO:0060173	BP	GO:0060173	limb development	43/2038	175/18493	2.96785e-07	4.96318e-05	4.24772e-05	1280/8092/5308/3227/3229/3226/2249/340419/655/3207/221833/6474/5307/22943/1750/3239/8456/7476/1749/6664/80144/79412/7020/2019/3691/7021/56603/27164/4621/494470/3236/2254/57167/1311/9496/642658/2253/343637/2719/257/6926/6659/116039	43
GO:0061982	BP	GO:0061982	meiosis I cell cycle process	33/2038	118/18493	2.98458e-07	4.96318e-05	4.24772e-05	676/56154/56776/898/9232/9319/5347/56159/995/147872/146956/5888/400629/993/84944/7153/2177/54514/84057/641/56979/1761/158401/225689/1164/11144/994/339834/164045/10609/254528/29893/9700	33
GO:0071804	BP	GO:0071804	cellular potassium ion transport	49/2038	212/18493	3.40357e-07	5.34549e-05	4.57491e-05	27133/51305/27012/3776/170850/4544/3781/10021/3757/51083/3746/6557/65268/219527/389816/3754/89822/88/3780/495/57628/3752/23416/6616/480/56660/10060/54207/486/3769/3755/3773/6833/29850/440699/23630/6549/3747/3767/27094/478/3792/3751/3785/3786/285335/27347/284525/389015	49
GO:0071805	BP	GO:0071805	potassium ion transmembrane transport	49/2038	212/18493	3.40357e-07	5.34549e-05	4.57491e-05	27133/51305/27012/3776/170850/4544/3781/10021/3757/51083/3746/6557/65268/219527/389816/3754/89822/88/3780/495/57628/3752/23416/6616/480/56660/10060/54207/486/3769/3755/3773/6833/29850/440699/23630/6549/3747/3767/27094/478/3792/3751/3785/3786/285335/27347/284525/389015	49
GO:0048663	BP	GO:0048663	neuron fate commitment	23/2038	67/18493	3.51281e-07	5.36796e-05	4.59414e-05	167826/256297/3226/64843/4821/10660/2138/3110/54845/1746/1745/3670/5454/6656/10215/429/3236/2128/58524/8022/54738/116448/4916	23
GO:0048706	BP	GO:0048706	embryonic skeletal system development	34/2038	125/18493	4.08058e-07	5.75718e-05	4.92725e-05	1280/8092/10736/3227/655/3219/579/2138/3207/6474/3223/10655/3975/3225/1746/1745/6664/7020/3218/4522/3222/3233/3221/3231/3217/3236/3204/2254/4188/57453/642658/257/4323/116039	34
GO:0051783	BP	GO:0051783	regulation of nuclear division	47/2038	201/18493	4.09854e-07	5.75718e-05	4.92725e-05	655/991/898/11065/9212/9232/9319/5347/81620/7272/9133/113130/995/891/9088/890/701/54443/9787/699/4751/990/10403/79616/4288/1063/10460/3832/1062/4085/56979/10309/1761/2069/899/51203/225689/286151/1111/8555/3552/9735/2253/339834/54908/1843/9700	47
GO:0007088	BP	GO:0007088	regulation of mitotic nuclear division	43/2038	177/18493	4.15427e-07	5.75718e-05	4.92725e-05	655/991/898/11065/9212/9232/9319/5347/81620/7272/9133/113130/995/891/9088/890/701/54443/9787/699/4751/990/10403/79616/4288/1063/10460/3832/1062/4085/10309/1761/2069/899/51203/1111/8555/3552/9735/2253/54908/1843/9700	43
GO:0048839	BP	GO:0048839	inner ear development	44/2038	183/18493	4.17482e-07	5.75718e-05	4.92725e-05	1280/168667/124590/84189/55283/3167/3776/2138/340784/50506/1750/9547/890/1749/5013/54845/57216/55584/4171/5456/7020/8013/6657/53904/79633/51761/79955/3208/2535/2254/65217/5754/2253/115908/2637/220/8022/219736/10804/525/5076/246213/2299/4916	44
GO:0009914	BP	GO:0009914	hormone transport	65/2038	316/18493	4.58915e-07	5.91736e-05	5.06434e-05	1393/1113/169026/3358/3623/8074/2044/1394/4544/139760/9515/1946/2696/143425/5798/2641/6755/51083/1813/222546/1268/27445/2922/3589/114899/6664/3670/2740/3710/4828/6580/6616/151/6513/10599/2297/114131/7021/18/668/6422/6833/1588/2692/7425/6863/3747/134/133308/4602/2752/6514/55107/3767/6696/10874/8600/55638/6926/6567/2243/5972/2244/286676/6659	65
GO:0010273	BP	GO:0010273	detoxification of copper ion	10/2038	15/18493	4.60495e-07	5.91736e-05	5.06434e-05	4490/4499/4496/4495/645745/4494/4501/4493/4502/4489	10
GO:1990169	BP	GO:1990169	stress response to copper ion	10/2038	15/18493	4.60495e-07	5.91736e-05	5.06434e-05	4490/4499/4496/4495/645745/4494/4501/4493/4502/4489	10
GO:0042391	BP	GO:0042391	regulation of membrane potential	81/2038	424/18493	4.91949e-07	5.9928e-05	5.1289e-05	27133/148/2555/2895/29119/2891/3776/83875/4544/3781/10021/340273/22953/1812/3757/2556/3359/10345/2569/124925/2898/115019/2566/3746/8913/54112/2568/2915/1128/1813/1634/1268/4355/22871/88/7476/151647/64208/149461/3752/2902/8911/23416/55584/5831/8001/55879/6323/480/285242/114131/18/2903/56853/254263/5026/2911/23630/6863/2859/3747/134/6332/2904/3060/1144/27092/140730/219736/3767/27094/30845/478/3751/…	81
GO:0044282	BP	GO:0044282	small molecule catabolic process	82/2038	431/18493	4.99205e-07	5.9928e-05	5.1289e-05	55576/1592/8277/222/8074/1543/10894/956/51302/54511/127/2572/5315/1591/259307/1491/51166/4521/1268/27284/2026/27294/55586/5105/1579/2571/5214/5239/4143/9582/5973/8564/84129/23569/57379/56603/3161/4329/6718/27124/18/9108/64902/339896/3242/131669/2110/27165/6898/80150/36/1962/33/112817/10690/217/4942/2752/10157/2954/54363/6822/443/6652/874/8529/954/226/84696/1807/6342/6999/5009/10449/137872/5446/11…	82
GO:0016054	BP	GO:0016054	organic acid catabolic process	57/2038	265/18493	5.08762e-07	5.9928e-05	5.1289e-05	55576/1592/10894/51302/54511/2572/259307/1491/51166/1268/5105/1579/2571/4143/5973/8564/84129/23569/56603/3161/4329/6718/18/64902/339896/3242/131669/2110/27165/6898/80150/36/1962/33/112817/4942/2752/10157/2954/54363/6822/443/6652/8529/84696/6342/6999/5009/10449/137872/5446/11001/197257/5053/594/23600/34	57
GO:0046395	BP	GO:0046395	carboxylic acid catabolic process	57/2038	265/18493	5.08762e-07	5.9928e-05	5.1289e-05	55576/1592/10894/51302/54511/2572/259307/1491/51166/1268/5105/1579/2571/4143/5973/8564/84129/23569/56603/3161/4329/6718/18/64902/339896/3242/131669/2110/27165/6898/80150/36/1962/33/112817/4942/2752/10157/2954/54363/6822/443/6652/8529/84696/6342/6999/5009/10449/137872/5446/11001/197257/5053/594/23600/34	57
GO:0042471	BP	GO:0042471	ear morphogenesis	32/2038	116/18493	6.28364e-07	7.10955e-05	6.08467e-05	1280/10736/124590/84189/3167/579/2138/340784/1750/1749/5013/57216/55584/5456/7020/8013/53904/51761/79955/2535/2254/5754/2253/115908/2637/220/219736/10804/525/5076/2299/116039	32
GO:0001708	BP	GO:0001708	cell fate specification	26/2038	84/18493	6.28718e-07	7.10955e-05	6.08467e-05	10736/167826/3226/64843/4821/10660/2138/3207/3110/22943/54845/3670/6657/5454/6656/367/10215/429/3236/2128/58524/8022/54738/5076/4916/55897	26
GO:0046883	BP	GO:0046883	regulation of hormone secretion	56/2038	261/18493	6.94598e-07	7.7005e-05	6.59043e-05	1393/1113/169026/3358/3623/8074/2044/1394/4544/9515/1946/2696/143425/2641/6755/51083/1813/222546/1268/2922/3589/114899/6664/3670/2740/3710/4828/6616/151/6513/114131/7021/18/668/6422/6833/1588/2692/6863/3747/134/133308/4602/2752/6514/55107/3767/6696/10874/8600/55638/2243/5972/2244/286676/6659	56
GO:0007631	BP	GO:0007631	feeding behavior	29/2038	101/18493	8.43101e-07	9.1671e-05	7.84562e-05	7345/3358/339403/127343/1812/6870/2641/2353/51083/4852/1813/1268/4886/2902/64220/8013/4889/680/2019/7054/2834/1602/51761/3953/3060/10874/5367/59272/5972	29
GO:0042472	BP	GO:0042472	inner ear morphogenesis	28/2038	96/18493	9.14761e-07	9.7586e-05	8.35185e-05	1280/124590/84189/3167/2138/340784/1750/1749/5013/57216/55584/5456/7020/8013/53904/51761/79955/2535/2254/5754/2253/115908/2637/220/219736/525/5076/2299	28
GO:0044784	BP	GO:0044784	metaphase/anaphase transition of cell cycle	20/2038	56/18493	9.84464e-07	0.000103077	8.8218e-05	991/9212/9319/5347/81620/7272/891/701/9787/699/990/10403/1063/10460/1062/4085/225689/54908/1843/9700	20
GO:0061687	BP	GO:0061687	detoxification of inorganic compound	10/2038	16/18493	1.10605e-06	0.000113702	9.73113e-05	4490/4499/4496/4495/645745/4494/4501/4493/4502/4489	10
GO:0021515	BP	GO:0021515	cell differentiation in spinal cord	19/2038	52/18493	1.22547e-06	0.000123729	0.000105892	167826/3226/64843/4821/10660/3110/57057/3975/3670/161357/6656/10215/429/3236/2128/64211/58524/8022/6659	19
GO:0010965	BP	GO:0010965	regulation of mitotic sister chromatid separation	20/2038	57/18493	1.36033e-06	0.000134935	0.000115484	991/9212/9232/9319/5347/81620/7272/891/701/9787/699/990/10403/1063/10460/1062/4085/54908/1843/9700	20
GO:0046879	BP	GO:0046879	hormone secretion	62/2038	306/18493	1.42984e-06	0.00013871	0.000118715	1393/1113/169026/3358/3623/8074/2044/1394/4544/139760/9515/1946/2696/143425/5798/2641/6755/51083/1813/222546/1268/27445/2922/3589/114899/6664/3670/2740/3710/4828/6616/151/6513/2297/114131/7021/18/668/6422/6833/1588/2692/7425/6863/3747/134/133308/4602/2752/6514/55107/3767/6696/10874/8600/55638/6926/2243/5972/2244/286676/6659	62
GO:1905818	BP	GO:1905818	regulation of chromosome separation	21/2038	62/18493	1.44746e-06	0.00013871	0.000118715	991/9212/9232/9319/5347/81620/7272/891/701/9787/699/990/10403/1063/10460/1062/4085/225689/54908/1843/9700	21
GO:1902099	BP	GO:1902099	regulation of metaphase/anaphase transition of cell cycle	19/2038	53/18493	1.71388e-06	0.000161504	0.000138223	991/9212/9319/5347/81620/7272/891/701/9787/699/990/10403/1063/1062/4085/225689/54908/1843/9700	19
GO:0001655	BP	GO:0001655	urogenital system development	64/2038	322/18493	1.93405e-06	0.000179264	0.000153422	10481/168667/1592/10736/3227/2302/3237/655/2138/2099/3207/7380/79727/7477/55165/3239/7827/3975/9245/1634/1958/3675/9350/768239/268/5979/57216/6664/1063/80144/64220/7020/7010/3691/2297/7021/367/56603/79633/3217/6422/255743/1588/2049/100133941/8842/153572/2253/247/9510/2028/4072/5076/6943/2719/9096/793/4435/6569/847/5972/6659/116039/170690	64
GO:0009953	BP	GO:0009953	dorsal/ventral pattern formation	26/2038	89/18493	2.14494e-06	0.0001925	0.00016475	6496/64399/3237/4821/3207/221833/57057/58495/3975/7476/9350/5992/2019/25806/6656/429/6422/25928/2128/64388/4010/4188/57453/2253/58524/8022	26
GO:0045132	BP	GO:0045132	meiotic chromosome segregation	26/2038	89/18493	2.14494e-06	0.0001925	0.00016475	56154/56776/898/9232/9319/5347/7272/83540/56159/147872/146956/701/23397/699/84944/7153/2177/641/158401/225689/11144/339834/164045/10609/254528/9700	26
GO:0007091	BP	GO:0007091	metaphase/anaphase transition of mitotic cell cycle	19/2038	54/18493	2.37249e-06	0.000209558	0.000179349	991/9212/9319/5347/81620/7272/891/701/9787/699/990/10403/1063/10460/1062/4085/54908/1843/9700	19
GO:0097501	BP	GO:0097501	stress response to metal ion	10/2038	17/18493	2.41965e-06	0.000209558	0.000179349	4490/4499/4496/4495/645745/4494/4501/4493/4502/4489	10
GO:0072503	BP	GO:0072503	cellular divalent inorganic cation homeostasis	87/2038	483/18493	2.44621e-06	0.000209558	0.000179349	4490/4499/4496/169026/3358/4495/148/55283/645745/2099/887/4494/4544/22953/1812/2696/6288/10345/3357/799/4501/2898/4493/6387/794/8989/5745/2915/4502/1813/201140/1268/5816/552/56302/84239/7780/147/6368/4489/2740/2902/5030/57113/3710/4828/55584/9170/6358/23566/79734/10803/9914/2903/5026/5737/100133941/6357/2911/10518/10590/6863/2056/2859/6375/5031/134/2904/7137/3060/126306/1910/9900/2053/3792/27112/…	87
GO:0015698	BP	GO:0015698	inorganic anion transport	41/2038	177/18493	2.83235e-06	0.000239016	0.000204561	1179/5349/2555/7809/8074/363/6508/57348/2556/83959/2569/115019/2566/9376/338440/6557/2568/142680/6521/2915/9022/7038/10568/5030/1188/1364/8001/22802/55879/10060/6561/5593/6505/57282/29127/5031/55107/7439/6569/6528/4363	41
GO:0033045	BP	GO:0033045	regulation of sister chromatid segregation	24/2038	80/18493	3.12034e-06	0.000256269	0.000219327	991/9212/9232/9319/5347/81620/7272/113130/891/701/9787/699/990/10403/1063/116028/10460/1062/4085/225689/2237/54908/1843/9700	24
GO:0072330	BP	GO:0072330	monocarboxylic acid biosynthetic process	59/2038	293/18493	3.12744e-06	0.000256269	0.000219327	1544/1576/1543/1558/51302/5315/6785/1571/5232/79152/255189/1634/83401/552/1559/5166/79993/2026/59344/1582/54988/2571/340895/6770/6296/5214/440/5210/10090/242/5740/5743/8564/6718/253017/18/8647/10998/2171/33/112817/64577/2203/863/9536/5354/247/220/2053/123876/116519/226/84696/6342/84532/10675/2819/11001/23600	59
GO:0007127	BP	GO:0007127	meiosis I	30/2038	113/18493	3.31371e-06	0.000267653	0.00022907	676/56154/56776/898/9232/9319/5347/56159/147872/146956/5888/400629/84944/7153/2177/54514/84057/641/56979/1761/158401/1164/11144/994/339834/164045/10609/254528/29893/9700	30
GO:0051306	BP	GO:0051306	mitotic sister chromatid separation	20/2038	60/18493	3.40081e-06	0.000270819	0.000231779	991/9212/9232/9319/5347/81620/7272/891/701/9787/699/990/10403/1063/10460/1062/4085/54908/1843/9700	20
GO:0007200	BP	GO:0007200	phospholipase C-activating G protein-coupled receptor signaling pathway	27/2038	97/18493	3.83111e-06	0.000300849	0.00025748	1113/1129/3358/148/2099/887/1812/5745/2915/1128/1813/2925/88/2922/147/5030/9630/23566/2911/2859/5031/55107/3060/1910/51764/2358/2840	27
GO:0015893	BP	GO:0015893	drug transport	47/2038	217/18493	4.04349e-06	0.000313177	0.000268031	3046/6530/56301/341359/6512/340273/2348/1812/143425/90019/83959/57586/51083/6387/1813/1268/6535/3043/6510/3045/6623/6857/6580/148641/3042/64220/10351/9152/6506/6561/64849/18/6505/284111/153201/3049/225689/9429/113278/3040/10227/58157/246213/56918/6542/4363/8856	47
GO:0030071	BP	GO:0030071	regulation of mitotic metaphase/anaphase transition	18/2038	51/18493	4.14084e-06	0.000315327	0.000269871	991/9212/9319/5347/81620/7272/891/701/9787/699/990/10403/1063/1062/4085/54908/1843/9700	18
GO:0021536	BP	GO:0021536	diencephalon development	23/2038	76/18493	4.22297e-06	0.000315327	0.000269871	190/5308/6496/50506/5307/3746/23440/1813/5013/3670/170302/6657/4929/10371/5454/10215/6716/2692/3747/2253/2637/8022/6887	23
GO:0009952	BP	GO:0009952	anterior/posterior pattern specification	46/2038	211/18493	4.23856e-06	0.000315327	0.000269871	8092/10736/163589/6496/3227/3229/3226/134701/3219/1045/3207/10683/3223/10655/56033/22943/3239/3975/389549/3225/7472/5013/9350/57216/7516/3224/3218/2019/3222/3233/3221/84667/3217/6422/3236/3204/145873/4300/2253/2637/92129/2719/9096/286204/6926/55897	46
GO:0016053	BP	GO:0016053	organic acid biosynthetic process	76/2038	413/18493	4.69799e-06	0.000344967	0.000295238	1544/1576/1543/1558/51302/5315/6785/1571/5232/1491/79152/255189/1634/83401/552/1559/5166/79993/2026/339983/59344/1582/54988/2571/340895/6770/6296/5214/440/5210/10090/242/5831/5740/5743/4522/8564/6718/284716/253017/18/8647/64902/339896/27165/10998/2171/33/112817/64577/2203/635/863/4942/9536/2752/5354/10157/247/443/124975/220/51380/2053/123876/116519/226/84696/6342/84532/10675/5009/2819/11001/5053/…	76
GO:0048608	BP	GO:0048608	reproductive structure development	78/2038	428/18493	5.1377e-06	0.000372418	0.000318732	10481/174/190/431707/3623/84870/655/1045/1515/56311/2099/3207/64591/10761/7477/58495/5798/3239/3975/56159/3880/81930/1634/7301/7472/400629/4521/7476/768239/268/6692/6770/7274/64220/5740/5743/10371/79733/10733/367/113026/653/1761/2069/899/668/4693/6422/259266/9021/10653/1588/6716/3491/2254/7425/11144/4188/3972/3696/144455/5270/642658/2253/247/2295/8022/9510/6696/6943/4323/4435/6926/2189/5972/269/2…	78
GO:0007094	BP	GO:0007094	mitotic spindle assembly checkpoint	14/2038	34/18493	6.09681e-06	0.000420382	0.000359782	991/9212/9319/5347/81620/7272/891/701/699/10403/1063/4085/54908/1843	14
GO:0031577	BP	GO:0031577	spindle checkpoint	14/2038	34/18493	6.09681e-06	0.000420382	0.000359782	991/9212/9319/5347/81620/7272/891/701/699/10403/1063/4085/54908/1843	14
GO:0071173	BP	GO:0071173	spindle assembly checkpoint	14/2038	34/18493	6.09681e-06	0.000420382	0.000359782	991/9212/9319/5347/81620/7272/891/701/699/10403/1063/4085/54908/1843	14
GO:0071174	BP	GO:0071174	mitotic spindle checkpoint	14/2038	34/18493	6.09681e-06	0.000420382	0.000359782	991/9212/9319/5347/81620/7272/891/701/699/10403/1063/4085/54908/1843	14
GO:0046688	BP	GO:0046688	response to copper ion	16/2038	43/18493	6.42902e-06	0.000437948	0.000374816	4490/4499/4496/1544/4495/645745/1543/4494/4501/4493/4502/983/4489/15/3552/6652	16
GO:0035107	BP	GO:0035107	appendage morphogenesis	35/2038	146/18493	6.58788e-06	0.00043821	0.00037504	1280/8092/3227/3226/2249/340419/655/3207/221833/6474/5307/22943/1750/3239/7476/1749/6664/80144/7020/2019/7021/56603/27164/4621/494470/3236/2254/57167/9496/2253/2719/257/6926/6659/116039	35
GO:0035108	BP	GO:0035108	limb morphogenesis	35/2038	146/18493	6.58788e-06	0.00043821	0.00037504	1280/8092/3227/3226/2249/340419/655/3207/221833/6474/5307/22943/1750/3239/7476/1749/6664/80144/7020/2019/7021/56603/27164/4621/494470/3236/2254/57167/9496/2253/2719/257/6926/6659/116039	35
GO:0061458	BP	GO:0061458	reproductive system development	78/2038	431/18493	6.70017e-06	0.000440497	0.000376997	10481/174/190/431707/3623/84870/655/1045/1515/56311/2099/3207/64591/10761/7477/58495/5798/3239/3975/56159/3880/81930/1634/7301/7472/400629/4521/7476/768239/268/6692/6770/7274/64220/5740/5743/10371/79733/10733/367/113026/653/1761/2069/899/668/4693/6422/259266/9021/10653/1588/6716/3491/2254/7425/11144/4188/3972/3696/144455/5270/642658/2253/247/2295/8022/9510/6696/6943/4323/4435/6926/2189/5972/269/2…	78
GO:0008217	BP	GO:0008217	regulation of blood pressure	40/2038	177/18493	7.06357e-06	0.000459051	0.000392877	1585/1113/354/148/3817/22953/6870/4879/4852/1813/1268/552/3816/4886/3043/147/1579/257313/2740/6296/10911/5743/680/151/5973/367/18/6863/134/7137/1910/2028/2053/8529/10874/59272/27347/5972/154/170690	40
GO:0006814	BP	GO:0006814	sodium ion transport	46/2038	215/18493	7.17687e-06	0.000461114	0.000394642	55117/5349/10021/1482/83959/51297/6557/142680/65268/1813/55515/6535/10568/495/1272/6323/480/6561/64849/486/201780/8647/284111/54407/6554/57282/29850/128414/6549/55089/133308/6332/154215/5270/478/10246/1756/285335/246213/27347/6569/6528/60482/284525/154/389015	46
GO:0098754	BP	GO:0098754	detoxification	31/2038	123/18493	7.37545e-06	0.000468548	0.000401005	4490/4499/4496/3046/4495/655/645745/4494/50506/4501/4493/4502/2944/3043/3045/4489/3240/3042/5743/3049/389434/3040/2954/4025/22977/1728/53905/2882/213/847/5446	31
GO:0009072	BP	GO:0009072	aromatic amino acid family metabolic process	15/2038	39/18493	7.7737e-06	0.00047527	0.000406758	259307/51166/84842/4522/8564/7054/3242/131669/6898/80150/389434/2954/7166/6999/5053	15
GO:2000816	BP	GO:2000816	negative regulation of mitotic sister chromatid separation	15/2038	39/18493	7.7737e-06	0.00047527	0.000406758	991/9212/9232/9319/5347/81620/7272/891/701/699/10403/1063/4085/54908/1843	15
GO:0006836	BP	GO:0006836	neurotransmitter transport	54/2038	268/18493	7.89213e-06	0.00047527	0.000406758	55117/1129/6530/3358/11254/341359/148/2555/9515/6512/2914/1812/143425/90019/23025/57586/8618/26059/1813/1268/22871/6535/7476/27445/3043/6623/6857/5030/6580/6616/9152/55879/6506/8564/7054/5582/18/6505/153201/6539/136/2752/8448/3060/140730/9900/204962/440279/6540/9751/246213/10675/8600/60482	54
GO:0098656	BP	GO:0098656	anion transmembrane transport	54/2038	268/18493	7.89213e-06	0.00047527	0.000406758	55117/56301/11254/1179/5349/2555/7809/6508/6512/2348/57348/2556/83959/2569/115019/2566/9376/338440/6557/2568/6521/2915/9022/6535/6510/366/1188/64220/1364/9152/8001/22802/55879/6506/6561/64849/6505/284111/153201/10998/54407/57282/6539/162515/9123/55089/55107/7057/246213/7439/27347/6569/6542/4363	54
GO:0046686	BP	GO:0046686	response to cadmium ion	20/2038	63/18493	7.90156e-06	0.00047527	0.000406758	4490/4499/4496/1544/4495/645745/4494/4501/2353/4493/4502/983/4521/4489/6770/4318/6652/1841/6569/847	20
GO:0046394	BP	GO:0046394	carboxylic acid biosynthetic process	75/2038	412/18493	8.07896e-06	0.000480826	0.000411512	1544/1576/1543/1558/51302/5315/6785/1571/5232/1491/79152/255189/1634/83401/552/1559/5166/79993/2026/339983/59344/1582/54988/2571/340895/6770/6296/5214/440/5210/10090/242/5831/5740/5743/4522/8564/6718/284716/253017/18/8647/64902/339896/27165/10998/2171/33/112817/64577/2203/635/863/4942/9536/2752/5354/10157/247/443/124975/220/2053/123876/116519/226/84696/6342/84532/10675/5009/2819/11001/5053/23600	75
GO:0009063	BP	GO:0009063	cellular amino acid catabolic process	30/2038	118/18493	8.53812e-06	0.000502859	0.00043037	54511/2572/259307/1491/51166/2571/4143/8564/23569/4329/18/64902/339896/3242/131669/27165/6898/80150/36/112817/4942/2752/10157/2954/443/6999/5009/137872/5053/594	30
GO:0033046	BP	GO:0033046	negative regulation of sister chromatid segregation	16/2038	44/18493	9.07389e-06	0.000528905	0.000452661	991/9212/9232/9319/5347/81620/7272/891/701/699/10403/1063/4085/54908/1843/9700	16
GO:0019233	BP	GO:0019233	sensory perception of pain	27/2038	102/18493	1.0685e-05	0.000613654	0.000525192	26952/7345/10879/55273/117194/55/6387/8989/1268/151647/4886/59344/2902/3218/6323/5743/3231/2903/2911/2171/6863/134/55107/1910/3751/10874/60675	27
GO:0008202	BP	GO:0008202	steroid metabolic process	61/2038	318/18493	1.07449e-05	0.000613654	0.000525192	1585/174/190/1592/1544/1557/1576/8074/2099/1543/1558/51302/1571/25830/51083/1591/2539/319/1559/27284/3290/1958/1582/54658/3931/1555/340895/6770/50700/56603/653/8435/6718/1071/23541/8647/10998/1588/6716/6653/7364/2538/33/3972/6095/3953/6822/3565/8630/2053/116519/6696/27120/6342/27329/10449/847/285440/11001/8856/23600	61
GO:0035902	BP	GO:0035902	response to immobilization stress	12/2038	27/18493	1.10246e-05	0.00061716	0.000528194	190/1544/1543/7031/2353/51083/114131/7054/5309/7166/5972/5967	12
GO:0071280	BP	GO:0071280	cellular response to copper ion	12/2038	27/18493	1.10246e-05	0.00061716	0.000528194	4490/4499/4496/1544/4495/645745/1543/4494/4501/4493/4502/4489	12
GO:1905819	BP	GO:1905819	negative regulation of chromosome separation	15/2038	40/18493	1.11756e-05	0.000619481	0.00053018	991/9212/9232/9319/5347/81620/7272/891/701/699/10403/1063/4085/54908/1843	15
GO:0051985	BP	GO:0051985	negative regulation of chromosome segregation	16/2038	45/18493	1.2647e-05	0.000694234	0.000594156	991/9212/9232/9319/5347/81620/7272/891/701/699/10403/1063/4085/54908/1843/9700	16
GO:0045841	BP	GO:0045841	negative regulation of mitotic metaphase/anaphase transition	14/2038	36/18493	1.34348e-05	0.000730389	0.0006251	991/9212/9319/5347/81620/7272/891/701/699/10403/1063/4085/54908/1843	14
GO:0051784	BP	GO:0051784	negative regulation of nuclear division	19/2038	60/18493	1.37929e-05	0.000742715	0.000635649	655/991/9212/9232/9319/5347/81620/7272/891/701/699/10403/1063/4085/1761/286151/1111/54908/1843	19
GO:0006270	BP	GO:0006270	DNA replication initiation	13/2038	32/18493	1.56288e-05	0.000825844	0.000706795	898/55388/81620/90381/23594/8318/4998/990/4171/4176/8317/4175/647309	13
GO:0021522	BP	GO:0021522	spinal cord motor neuron differentiation	13/2038	32/18493	1.56288e-05	0.000825844	0.000706795	167826/3226/64843/4821/10660/3110/57057/3670/161357/10215/3236/8022/6659	13
GO:0048704	BP	GO:0048704	embryonic skeletal system morphogenesis	25/2038	93/18493	1.67799e-05	0.000870138	0.000744703	1280/8092/10736/3227/655/2138/3207/6474/3975/3225/1746/6664/7020/3218/4522/3233/3221/3217/3236/3204/4188/57453/257/4323/116039	25
GO:0019373	BP	GO:0019373	epoxygenase P450 pathway	10/2038	20/18493	1.68128e-05	0.000870138	0.000744703	1544/1557/1543/1558/1571/1559/1579/1555/2053/8529	10
GO:0001763	BP	GO:0001763	morphogenesis of a branching structure	42/2038	196/18493	1.69288e-05	0.000870138	0.000744703	2658/10481/10736/64399/3237/9723/84870/340419/655/2138/2099/3207/57057/6474/3239/3975/1813/7472/1746/6692/57216/10371/2297/53335/367/79633/3217/6422/255743/9021/10653/2253/2637/780/284217/5076/6943/2719/4323/4435/6926/170690	42
GO:0050905	BP	GO:0050905	neuromuscular process	27/2038	105/18493	1.89541e-05	0.000963612	0.000824703	7345/124590/3226/84189/2895/340784/4747/1812/9543/54112/1813/64478/2902/64220/8013/6323/1496/51761/2903/3236/65217/1144/220/2173/1134/4861/2307	27
GO:0007618	BP	GO:0007618	mating	14/2038	37/18493	1.9429e-05	0.000963612	0.000824703	10876/4808/84152/7932/1812/1268/552/2902/7054/18/5266/6863/5270/1910	14
GO:0071276	BP	GO:0071276	cellular response to cadmium ion	14/2038	37/18493	1.9429e-05	0.000963612	0.000824703	4490/4499/4496/1544/4495/645745/4494/4501/2353/4493/4502/4489/6770/4318	14
GO:1902100	BP	GO:1902100	negative regulation of metaphase/anaphase transition of cell cycle	14/2038	37/18493	1.9429e-05	0.000963612	0.000824703	991/9212/9319/5347/81620/7272/891/701/699/10403/1063/4085/54908/1843	14
GO:0007586	BP	GO:0007586	digestion	32/2038	135/18493	2.05389e-05	0.00100404	0.000859303	1208/6750/5644/248/2980/389383/887/7031/57817/51302/340204/7032/9245/1128/340547/80168/170302/388743/64081/7033/114131/8435/6718/100507055/6863/6514/2984/116519/10874/5646/27347/389015	32
GO:1902850	BP	GO:1902850	microtubule cytoskeleton organization involved in mitosis	31/2038	129/18493	2.05993e-05	0.00100404	0.000859303	4605/991/1058/9212/89958/5347/7272/24137/83540/284403/9493/891/3833/57405/4751/10403/22974/10460/9055/3832/1062/3925/51203/6491/29127/285643/8555/29899/84722/54908/9700	31
GO:0031667	BP	GO:0031667	response to nutrient levels	83/2038	481/18493	2.17416e-05	0.00105066	0.0008992	1208/6750/1592/6753/3358/92196/389383/655/8074/1515/1543/2520/57817/2348/22953/2696/340204/5315/4654/2689/1591/2539/4852/54474/5617/9227/8735/1268/5166/7350/5105/54658/5251/6770/2902/5030/7274/440/27344/5743/6513/2308/114131/53335/7054/5582/2180/56603/429/3208/57535/6422/7298/7538/5026/6716/54407/1723/4316/2538/7425/100507055/10518/220441/2056/2752/6652/3767/6696/467/5076/1728/23710/56477/5009/21…	83
GO:0033048	BP	GO:0033048	negative regulation of mitotic sister chromatid segregation	15/2038	42/18493	2.21361e-05	0.00106066	0.000907756	991/9212/9232/9319/5347/81620/7272/891/701/699/10403/1063/4085/54908/1843	15
GO:0015711	BP	GO:0015711	organic anion transport	80/2038	460/18493	2.29069e-05	0.00108837	0.000931475	768/55117/56301/11254/133482/28234/6508/6512/2348/338821/4948/83959/115019/6521/1813/255189/26154/552/6535/3043/6510/1579/6857/366/4828/64220/9152/4889/6513/6506/80765/6561/10599/64849/8564/2180/762/1071/201780/18/6505/51761/8647/284111/84879/153201/27165/26279/10998/54407/6554/57282/2538/6539/9122/162515/9123/113278/55089/3040/134/6514/10227/7057/9900/8529/116519/6540/59272/6342/10246/246213/743…	80
GO:0006261	BP	GO:0006261	DNA-dependent DNA replication	34/2038	148/18493	2.32512e-05	0.00109552	0.000937594	898/55388/81620/90381/23594/8318/146956/5888/4998/9837/990/10721/4171/641/51659/79733/57379/1602/10535/84296/4176/389643/5984/144455/8317/11169/63922/3159/2237/4175/79075/647309/64785/79915	34
GO:0006953	BP	GO:0006953	acute-phase response	16/2038	47/18493	2.37243e-05	0.00110857	0.000948766	6289/130120/57817/6288/4153/1268/5068/54658/3240/5743/2056/3552/1910/8600/8792/6291	16
GO:0017001	BP	GO:0017001	antibiotic catabolic process	18/2038	57/18493	2.40976e-05	0.00110874	0.000948906	3046/222/50506/27284/3043/5105/3045/54658/3240/3042/5973/3049/217/3040/6822/4025/53905/847	18
GO:0021879	BP	GO:0021879	forebrain neuron differentiation	17/2038	52/18493	2.43161e-05	0.00110874	0.000948906	431707/1812/23440/1813/1749/1746/1745/5456/170302/10371/6656/27164/429/57282/64211/2253/2637	17
GO:0045839	BP	GO:0045839	negative regulation of mitotic nuclear division	17/2038	52/18493	2.43161e-05	0.00110874	0.000948906	655/991/9212/9232/9319/5347/81620/7272/891/701/699/10403/1063/4085/1111/54908/1843	17
GO:0031649	BP	GO:0031649	heat generation	9/2038	17/18493	2.50481e-05	0.00113297	0.00096965	1268/5743/18/3552/1910/10874/8600/8792/154	9
GO:0001823	BP	GO:0001823	mesonephros development	26/2038	101/18493	2.6302e-05	0.00117728	0.00100757	168667/10736/2302/3237/655/2138/3207/3975/9350/5979/2297/79633/3217/6422/255743/2253/4072/5076/6943/2719/793/4435/847/5972/116039/170690	26
GO:0072001	BP	GO:0072001	renal system development	55/2038	286/18493	2.65332e-05	0.00117728	0.00100757	168667/1592/10736/3227/2302/3237/655/2138/3207/7380/79727/7477/55165/7827/3975/9245/1634/1958/3675/9350/5979/57216/6664/1063/80144/64220/7020/7010/3691/2297/7021/56603/79633/3217/6422/255743/100133941/8842/153572/2253/9510/2028/4072/5076/6943/2719/9096/793/4435/6569/847/5972/6659/116039/170690	55
GO:0042759	BP	GO:0042759	long-chain fatty acid biosynthetic process	12/2038	29/18493	2.66522e-05	0.00117728	0.00100757	1544/1576/1543/1558/1571/1559/59344/242/5743/5354/247/2053	12
GO:0006821	BP	GO:0006821	chloride transport	27/2038	107/18493	2.73262e-05	0.00119769	0.00102504	1179/5349/2555/7809/57348/2556/2569/115019/2566/338440/6557/2568/6521/2915/9022/5030/1188/1364/8001/22802/55879/5593/6505/57282/5031/55107/7439	27
GO:0061351	BP	GO:0061351	neural precursor cell proliferation	33/2038	143/18493	2.7627e-05	0.00120156	0.00102835	6496/64399/3642/11023/79801/23440/1813/7472/9833/7476/6692/23305/170302/1627/2308/5454/131405/10642/429/5309/388610/259266/10653/9928/64211/29127/6095/2253/2637/6604/2173/9048/644943	33
GO:0033047	BP	GO:0033047	regulation of mitotic sister chromatid segregation	20/2038	68/18493	2.79781e-05	0.00120754	0.00103347	991/9212/9232/9319/5347/81620/7272/891/701/9787/699/990/10403/1063/10460/1062/4085/54908/1843/9700	20
GO:0035249	BP	GO:0035249	synaptic transmission, glutamatergic	24/2038	90/18493	2.83922e-05	0.00121613	0.00104082	2895/2891/2914/1812/22943/23025/2898/2915/1813/2913/1268/22871/6857/2902/5743/8564/254263/2911/134/5270/2752/27092/440279/246213	24
GO:0006067	BP	GO:0006067	ethanol metabolic process	10/2038	21/18493	2.89256e-05	0.00122257	0.00104633	222/127/125/27284/126/130/124/217/6822/84532	10
GO:0051307	BP	GO:0051307	meiotic chromosome separation	11/2038	25/18493	2.89751e-05	0.00122257	0.00104633	7272/56159/146956/23397/7153/641/158401/225689/164045/254528/9700	11
GO:0071241	BP	GO:0071241	cellular response to inorganic substance	43/2038	207/18493	2.99259e-05	0.00125334	0.00107266	4490/1393/1585/63928/4499/4496/1544/4495/125981/341359/645745/1543/4494/2354/143425/90019/57586/4501/2353/4493/891/4502/890/22871/8437/4489/6857/6770/4318/7020/1894/5743/641/2308/131034/7054/3208/151835/2203/3747/27132/1728/6569	43
GO:0055078	BP	GO:0055078	sodium ion homeostasis	16/2038	48/18493	3.19698e-05	0.0013291	0.0011375	1585/7380/730/4879/1813/552/495/1579/480/7021/6863/134/6332/1910/478/8529	16
GO:0006260	BP	GO:0006260	DNA replication	52/2038	268/18493	3.39152e-05	0.00138387	0.00118438	2658/345643/898/55388/81620/90381/23594/8318/146956/983/890/5888/80119/4998/8208/9837/9156/990/10721/9401/63967/116028/6241/4171/641/51514/51659/79733/57379/2069/1602/6282/10535/84296/4176/157570/389643/5984/1111/144455/8317/11169/3060/63922/3159/2237/4175/84515/79075/647309/64785/79915	52
GO:0015849	BP	GO:0015849	organic acid transport	59/2038	316/18493	3.40215e-05	0.00138387	0.00118438	55117/56301/11254/28234/6512/2348/338821/4948/115019/1813/255189/552/6535/6510/1579/6857/366/4828/64220/9152/4889/6506/80765/6561/10599/64849/8564/2180/201780/18/6505/8647/284111/84879/153201/27165/26279/10998/54407/6554/6539/9122/162515/9123/55089/134/7057/9900/8529/6540/59272/10246/246213/8600/6567/27347/8792/6542/11001	59
GO:0046942	BP	GO:0046942	carboxylic acid transport	59/2038	316/18493	3.40215e-05	0.00138387	0.00118438	55117/56301/11254/28234/6512/2348/338821/4948/115019/1813/255189/552/6535/6510/1579/6857/366/4828/64220/9152/4889/6506/80765/6561/10599/64849/8564/2180/201780/18/6505/8647/284111/84879/153201/27165/26279/10998/54407/6554/6539/9122/162515/9123/55089/134/7057/9900/8529/6540/59272/10246/246213/8600/6567/27347/8792/6542/11001	59
GO:0034754	BP	GO:0034754	cellular hormone metabolic process	28/2038	115/18493	3.94448e-05	0.00159301	0.00136337	1585/174/1592/1576/2099/1543/83875/127/9227/1958/54658/6770/50700/56603/653/6718/54659/5959/15/1588/6716/7364/64577/3972/8630/220/6696/54577	28
GO:0016999	BP	GO:0016999	antibiotic metabolic process	34/2038	152/18493	4.16863e-05	0.00167159	0.00143062	3046/1544/222/1543/50506/127/125/405753/27284/3043/5105/126/3045/54658/2690/6770/3240/3042/130/124/5973/131669/3049/6716/217/3040/5161/6822/4025/10020/84532/53905/6569/847	34
GO:0071248	BP	GO:0071248	cellular response to metal ion	39/2038	184/18493	4.30808e-05	0.00171534	0.00146807	4490/1393/1585/63928/4499/4496/1544/4495/125981/341359/645745/1543/4494/2354/143425/90019/57586/4501/2353/4493/891/4502/22871/8437/4489/6857/6770/4318/7020/1894/5743/131034/7054/3208/151835/2203/27132/1728/6569	39
GO:0055074	BP	GO:0055074	calcium ion homeostasis	79/2038	461/18493	4.34324e-05	0.00171725	0.0014697	3358/148/55283/2099/887/4544/22953/1812/2696/6288/10345/3357/799/2898/6387/794/8989/5745/2915/1813/201140/1268/5816/552/56302/84239/147/6368/2740/2902/5030/57113/3710/4828/55584/9170/57402/7021/6358/23566/79734/10803/9914/2903/5026/5737/100133941/6357/2911/10518/10590/6863/2056/2859/6375/5031/134/2904/7137/3060/126306/1910/9900/2053/3792/27112/525/10874/60675/56477/793/1756/2358/8600/387129/2840/…	79
GO:0033189	BP	GO:0033189	response to vitamin A	9/2038	18/18493	4.51914e-05	0.00175662	0.0015034	1592/1543/57817/9227/56603/7298/2056/6569/847	9
GO:0006721	BP	GO:0006721	terpenoid metabolic process	26/2038	104/18493	4.53603e-05	0.00175662	0.0015034	1592/1544/1557/1576/1543/83875/127/5948/1571/9227/1559/54658/6770/64220/50700/7804/221914/56603/54659/5959/64577/220/2719/2239/54577/285440	26
GO:0021510	BP	GO:0021510	spinal cord development	26/2038	104/18493	4.53603e-05	0.00175662	0.0015034	167826/3226/64843/4821/10660/3110/57057/4747/3975/6664/3670/5992/3218/161357/6656/10215/429/3236/2128/64211/644168/58524/8022/387804/23500/6659	26
GO:0001822	BP	GO:0001822	kidney development	52/2038	271/18493	4.61794e-05	0.00177618	0.00152013	168667/1592/10736/3227/2302/3237/655/2138/3207/7380/79727/7477/7827/3975/9245/1634/1958/3675/9350/5979/57216/6664/1063/80144/64220/7020/7010/2297/7021/56603/79633/3217/6422/255743/100133941/8842/153572/2253/9510/2028/4072/5076/6943/2719/793/4435/6569/847/5972/6659/116039/170690	52
GO:0008015	BP	GO:0008015	blood circulation	83/2038	492/18493	4.97384e-05	0.00190014	0.00162623	27302/1585/1113/1129/354/4922/7138/148/3817/29119/57057/4544/3781/10021/1621/22953/1482/1812/3757/6870/4879/10345/3357/8913/4852/6387/2775/1813/7139/1268/552/3816/4886/3043/147/1579/257313/3752/2740/6296/1827/4018/3710/7136/10911/6323/5743/137868/680/151/7010/10371/85366/5973/6445/5138/7054/367/18/6505/23630/6863/2056/1311/134/136/7137/1910/2028/2053/30845/8529/6271/3792/10874/59272/1756/27347/22…	83
GO:0016042	BP	GO:0016042	lipid catabolic process	59/2038	321/18493	5.42394e-05	0.00205818	0.00176149	1208/2172/1592/1544/1576/125981/389383/8074/83875/8877/51302/340204/1591/255189/5050/1268/27293/5105/1579/283748/1149/221223/84129/113026/56603/5346/6718/2110/26279/1588/6716/1962/2171/33/100507055/79887/57552/133121/134/79153/54363/150379/6822/8630/8529/116519/6696/2173/84696/6342/13/27329/10449/345557/123745/11001/200879/23600/34	59
GO:0010043	BP	GO:0010043	response to zinc ion	17/2038	55/18493	5.4785e-05	0.00206503	0.00176734	4490/4499/4496/169026/4495/645745/4494/57817/4501/4493/4502/7780/4489/7054/15/6833/5009	17
GO:0043270	BP	GO:0043270	positive regulation of ion transport	50/2038	260/18493	6.03625e-05	0.0022602	0.00193438	22953/1482/1812/3757/3359/10345/799/2641/51083/3746/2539/6387/65268/219527/389816/1128/1813/342667/88/552/1272/1579/2902/8564/23566/18/51761/6833/5026/440699/23630/6375/5031/3747/134/3060/27092/3767/30845/8529/6271/59272/1756/8600/27347/387129/6569/8792/154/7222	50
GO:0060993	BP	GO:0060993	kidney morphogenesis	24/2038	94/18493	6.10705e-05	0.00227166	0.00194419	10736/2302/3237/655/2138/3207/7477/3975/9245/57216/80144/2297/79633/3217/255743/153572/2253/5076/6943/2719/793/4435/6659/170690	24
GO:1901606	BP	GO:1901606	alpha-amino acid catabolic process	25/2038	100/18493	6.30332e-05	0.00232934	0.00199356	54511/2572/259307/51166/2571/4143/8564/23569/4329/64902/3242/131669/27165/6898/80150/112817/4942/2752/10157/2954/443/6999/5009/137872/5053	25
GO:0006936	BP	GO:0006936	muscle contraction	63/2038	351/18493	6.40521e-05	0.00234423	0.0020063	27302/1113/1129/7138/148/29119/8877/57057/3781/10021/22953/1482/1812/3757/6870/10345/3357/8913/2775/1813/8735/7139/88/6535/147/3752/4619/7136/10911/6323/5743/151/85366/4626/493829/18/51761/4621/255743/4620/4703/124093/23630/1311/134/6332/136/7137/1144/126306/1910/30845/10874/60675/226/59272/1134/84676/4606/1756/7169/6752/154	63
GO:0007613	BP	GO:0007613	memory	27/2038	112/18493	6.46798e-05	0.00234423	0.0020063	3776/114/84152/4908/1621/1812/1813/22849/1268/3675/22986/2902/3710/5743/54207/7054/2903/4192/6833/100132074/6863/4909/4009/793/2237/11202/23316	27
GO:0046717	BP	GO:0046717	acid secretion	27/2038	112/18493	6.46798e-05	0.00234423	0.0020063	887/6512/7032/1813/255189/552/6510/1579/6857/366/4828/4889/6506/8564/18/6505/8647/27165/26279/54407/134/9900/8529/10874/8600/8792/389015	27
GO:0007548	BP	GO:0007548	sex differentiation	51/2038	268/18493	6.79277e-05	0.00241433	0.00206629	174/190/431707/3623/117154/1515/56311/2099/3207/64591/5798/3239/3975/56159/81930/7301/400629/4521/7476/268/84733/2491/6770/64220/10371/367/653/1761/2069/1602/668/6422/259266/1588/6716/2254/7425/11144/3972/642658/2253/2295/58524/9510/6943/4323/6926/2189/5972/269/9468	51
GO:0006882	BP	GO:0006882	cellular zinc ion homeostasis	13/2038	36/18493	6.80696e-05	0.00241433	0.00206629	4490/4499/4496/169026/4495/645745/4494/4501/4493/4502/7780/4489/23516	13
GO:0055123	BP	GO:0055123	digestive system development	32/2038	143/18493	6.85909e-05	0.00241433	0.00206629	10736/10551/256297/4821/51208/579/1045/1543/887/6474/25803/58495/56033/3239/891/5979/57216/6664/64220/3691/79633/83881/429/6422/7298/2049/2254/2295/1910/6943/5009/5967	32
GO:0060384	BP	GO:0060384	innervation	11/2038	27/18493	6.87489e-05	0.00241433	0.00206629	84189/84570/4884/23025/5979/3670/10371/5582/494470/4909/5270	11
GO:0099560	BP	GO:0099560	synaptic membrane adhesion	11/2038	27/18493	6.87489e-05	0.00241433	0.00206629	114798/1007/1946/22871/22865/8404/2239/84628/57689/78999/64101	11
GO:0001656	BP	GO:0001656	metanephros development	23/2038	89/18493	7.04625e-05	0.00245923	0.00210472	10736/3227/2302/655/2138/3207/7477/7827/3975/1958/5979/80144/2297/7021/79633/153572/2253/5076/6943/2719/793/4435/116039	23
GO:0055067	BP	GO:0055067	monovalent inorganic cation homeostasis	31/2038	137/18493	7.09003e-05	0.00245933	0.0021048	1585/6508/7380/3757/730/83959/4879/50617/6557/6521/1813/552/5166/495/1579/245972/7274/480/7021/57282/6549/6863/134/6332/1910/478/8529/525/285335/284525/389015	31
GO:0048565	BP	GO:0048565	digestive tract development	30/2038	131/18493	7.29016e-05	0.00251333	0.00215102	10736/10551/4821/51208/579/1045/1543/887/6474/25803/58495/3239/891/5979/57216/6664/64220/3691/79633/83881/429/6422/7298/2049/2254/2295/1910/6943/5009/5967	30
GO:0019369	BP	GO:0019369	arachidonic acid metabolic process	16/2038	51/18493	7.37805e-05	0.0025227	0.00215904	1544/1557/1543/1558/1571/1559/59344/1579/1555/242/5740/5743/9536/247/2053/8529	16
GO:0030326	BP	GO:0030326	embryonic limb morphogenesis	29/2038	125/18493	7.45121e-05	0.0025227	0.00215904	8092/3227/3226/2249/340419/655/3207/221833/6474/5307/22943/1750/3239/7476/1749/80144/7020/2019/56603/4621/3236/2254/57167/9496/2253/2719/257/6926/116039	29
GO:0035113	BP	GO:0035113	embryonic appendage morphogenesis	29/2038	125/18493	7.45121e-05	0.0025227	0.00215904	8092/3227/3226/2249/340419/655/3207/221833/6474/5307/22943/1750/3239/7476/1749/80144/7020/2019/56603/4621/3236/2254/57167/9496/2253/2719/257/6926/116039	29
GO:0061138	BP	GO:0061138	morphogenesis of a branching epithelium	38/2038	182/18493	7.53923e-05	0.00253731	0.00217155	2658/10481/10736/64399/3237/9723/84870/340419/655/2138/2099/3207/57057/3239/3975/7472/6692/57216/10371/2297/367/79633/3217/6422/255743/9021/10653/2253/2637/780/284217/5076/6943/2719/4323/4435/6926/170690	38
GO:0071294	BP	GO:0071294	cellular response to zinc ion	10/2038	23/18493	7.62241e-05	0.00255012	0.00218251	4490/4499/4496/4495/645745/4494/4501/4493/4502/4489	10
GO:0034765	BP	GO:0034765	regulation of ion transmembrane transport	77/2038	454/18493	7.6692e-05	0.00255068	0.00218299	1393/27133/5349/27012/1394/170850/4544/3781/10021/57817/6588/1812/3757/3359/10345/799/51083/3746/2539/8913/338440/51297/65268/219527/2915/389816/3754/1813/201140/342667/89822/22871/88/9022/57628/3752/8911/4318/23416/1188/6323/56660/59285/54207/486/3769/3755/3208/3773/254263/6833/29850/117532/440699/23630/2056/2859/6375/5031/3747/6332/7057/27092/126306/3767/30845/117144/6271/3792/3751/3785/1756/37…	77
GO:0051781	BP	GO:0051781	positive regulation of cell division	22/2038	84/18493	8.09235e-05	0.00267568	0.00228997	2249/9212/117194/3357/6755/5473/2250/9493/1813/990/84432/2248/1894/2069/4192/9928/2254/29127/3552/994/2253/847	22
GO:0001657	BP	GO:0001657	ureteric bud development	24/2038	96/18493	8.76375e-05	0.00287641	0.00246176	168667/10736/2302/3237/655/2138/3207/3975/9350/5979/2297/79633/3217/6422/255743/2253/4072/5076/6943/2719/793/4435/847/170690	24
GO:0003013	BP	GO:0003013	circulatory system process	83/2038	500/18493	8.80119e-05	0.00287641	0.00246176	27302/1585/1113/1129/354/4922/7138/148/3817/29119/57057/4544/3781/10021/1621/22953/1482/1812/3757/6870/4879/10345/3357/8913/4852/6387/2775/1813/7139/1268/552/3816/4886/3043/147/1579/257313/3752/2740/6296/1827/4018/3710/7136/10911/6323/5743/137868/680/151/7010/10371/85366/5973/6445/5138/7054/367/18/6505/23630/6863/2056/1311/134/136/7137/1910/2028/2053/30845/8529/6271/3792/10874/59272/1756/27347/22…	83
GO:0045165	BP	GO:0045165	cell fate commitment	49/2038	257/18493	8.89126e-05	0.00288503	0.00246914	10736/167826/256297/3226/64843/4821/10660/2138/3207/3110/25803/1482/7477/5307/22943/4654/8456/7472/7476/54845/1746/1745/3670/170302/6657/5454/6656/367/10215/56603/429/6422/3236/25928/2128/2596/57453/6095/4909/2253/58524/8022/54738/2619/5076/6926/116448/4916/55897	49
GO:0001676	BP	GO:0001676	long-chain fatty acid metabolic process	26/2038	108/18493	8.98064e-05	0.00288503	0.00246914	1544/1557/1576/1543/1558/1571/83401/1559/59344/1579/1555/23305/242/5740/5743/2180/10998/33/9536/5354/51703/247/2053/8529/6342/11001	26
GO:0007052	BP	GO:0007052	mitotic spindle organization	26/2038	108/18493	8.98064e-05	0.00288503	0.00246914	4605/991/9212/5347/7272/24137/83540/284403/9493/891/3833/57405/4751/10403/22974/10460/9055/3832/1062/3925/6491/29127/285643/8555/29899/84722	26
GO:0000022	BP	GO:0000022	mitotic spindle elongation	7/2038	12/18493	9.36288e-05	0.00297403	0.00254531	9212/24137/9493/9055/29127/285643/8555	7
GO:0006069	BP	GO:0006069	ethanol oxidation	7/2038	12/18493	9.36288e-05	0.00297403	0.00254531	127/125/126/130/124/217/84532	7
GO:0060078	BP	GO:0060078	regulation of postsynaptic membrane potential	31/2038	139/18493	9.45009e-05	0.00298496	0.00255466	2555/2895/2891/22953/2556/2569/124925/2898/2566/2915/1128/1813/4355/22871/7476/2902/55584/8001/18/2903/56853/5026/2911/134/2904/3060/1144/3751/1134/23316/154	31
GO:0031638	BP	GO:0031638	zymogen activation	16/2038	52/18493	9.57647e-05	0.00300808	0.00257445	354/3817/3816/2158/2903/8492/29108/5270/7057/1361/51279/4323/5646/2243/2244/2160	16
GO:0031644	BP	GO:0031644	regulation of neurological system process	29/2038	127/18493	0.000100762	0.00314757	0.00269383	26952/3358/4885/10879/4544/4884/55273/55/4099/22871/552/7476/151647/2902/18/2903/56853/254263/2911/2171/2859/134/3060/27092/1910/10874/11202/23316/154	29
GO:1904029	BP	GO:1904029	regulation of cyclin-dependent protein kinase activity	23/2038	91/18493	0.000101926	0.00316643	0.00270997	8941/898/5347/9133/995/891/9077/9088/890/2810/993/990/1033/79616/1029/641/10309/899/1164/219736/1031/84722/51191	23
GO:0072163	BP	GO:0072163	mesonephric epithelium development	24/2038	97/18493	0.000104446	0.00320943	0.00274678	168667/10736/2302/3237/655/2138/3207/3975/9350/5979/2297/79633/3217/6422/255743/2253/4072/5076/6943/2719/793/4435/847/170690	24
GO:0072164	BP	GO:0072164	mesonephric tubule development	24/2038	97/18493	0.000104446	0.00320943	0.00274678	168667/10736/2302/3237/655/2138/3207/3975/9350/5979/2297/79633/3217/6422/255743/2253/4072/5076/6943/2719/793/4435/847/170690	24
GO:0046887	BP	GO:0046887	positive regulation of hormone secretion	29/2038	128/18493	0.000116772	0.0035688	0.00305434	169026/3623/2696/2641/51083/1813/222546/2922/114899/6664/3670/4828/114131/18/668/1588/2692/6863/4602/2752/55107/6696/10874/8600/55638/2243/2244/286676/6659	29
GO:0042537	BP	GO:0042537	benzene-containing compound metabolic process	10/2038	24/18493	0.000117799	0.00358085	0.00306465	1571/51166/2944/54658/6770/8564/7054/6716/6999/5446	10
GO:0098661	BP	GO:0098661	inorganic anion transmembrane transport	26/2038	110/18493	0.000124173	0.0037544	0.00321318	1179/5349/2555/7809/57348/2556/83959/2569/115019/2566/338440/6557/2568/6521/2915/9022/1188/1364/8001/22802/55879/6561/6505/55107/7439/6569	26
GO:0055069	BP	GO:0055069	zinc ion homeostasis	13/2038	38/18493	0.000129132	0.00388357	0.00332373	4490/4499/4496/169026/4495/645745/4494/4501/4493/4502/7780/4489/23516	13
GO:0021872	BP	GO:0021872	forebrain generation of neurons	18/2038	64/18493	0.000131666	0.00392291	0.0033574	431707/1812/23440/1813/1749/1746/1745/5456/170302/10371/6656/27164/429/259266/57282/64211/2253/2637	18
GO:0010466	BP	GO:0010466	negative regulation of peptidase activity	49/2038	261/18493	0.000131827	0.00392291	0.0033574	26952/5858/10047/80760/27290/6318/10879/332/79444/9232/347365/59082/140832/5276/153218/4102/6317/221476/2810/128817/1893/1469/6692/4018/4318/27344/340267/5743/1447/5896/5973/1472/7021/4804/5274/10653/6653/5266/89932/256394/284293/5270/1470/7057/5076/135228/2719/286204/7078	49
GO:0000079	BP	GO:0000079	regulation of cyclin-dependent protein serine/threonine kinase activity	22/2038	87/18493	0.000141849	0.00419902	0.00359371	8941/898/5347/9133/995/891/9077/9088/890/2810/993/990/1033/79616/1029/641/10309/899/1164/1031/84722/51191	22
GO:0022037	BP	GO:0022037	metencephalon development	25/2038	105/18493	0.000146844	0.0042971	0.00367765	6753/256297/2895/8941/124925/3975/3746/7476/5013/1272/2902/2019/18/429/388610/4192/2146/9928/64211/6095/5270/2637/4009/6752/23026	25
GO:0098739	BP	GO:0098739	import across plasma membrane	25/2038	105/18493	0.000146844	0.0042971	0.00367765	10021/2348/799/6557/56302/495/6510/9152/480/6506/10060/486/3769/6505/3773/6549/3767/478/27112/285335/6569/23516/6542/284525/389015	25
GO:0099177	BP	GO:0099177	regulation of trans-synaptic signaling	71/2038	419/18493	0.000147442	0.0042971	0.00367765	1129/148/2895/114/4885/991/9515/4908/2914/4884/1812/143425/22943/23025/2898/794/2915/1813/2913/22849/1268/4355/22871/7476/22986/6623/6857/6770/2902/5030/3710/6616/85445/1627/9211/5743/4889/7804/1959/8564/3706/5582/18/2903/56853/254263/1949/2911/2171/10590/6863/4909/134/1759/2904/5270/136/2752/3060/27092/140730/440279/10874/793/10675/55638/23316/84628/57689/154/64101	71
GO:0045787	BP	GO:0045787	positive regulation of cell cycle	67/2038	390/18493	0.000148672	0.00431071	0.0036893	8091/3642/1543/8877/898/11065/9212/117194/81620/6755/9133/9493/113130/995/891/1813/8318/983/890/51512/9787/2810/993/1869/990/10403/79616/9401/440/8013/1894/51514/4085/4582/56979/10309/79733/10733/1820/1761/2069/899/51203/429/2146/2301/225689/9928/1164/1111/29127/3552/144455/8317/10615/994/2253/29899/9510/219736/6604/84722/2237/6926/6659/9700/79915	67
GO:0072006	BP	GO:0072006	nephron development	30/2038	136/18493	0.00014971	0.00431868	0.00369612	10736/2302/3237/655/2138/3207/7477/7827/3975/1958/3675/5979/57216/7010/2297/7021/79633/3217/255743/100133941/8842/153572/2253/2028/5076/6943/2719/793/4435/170690	30
GO:0051302	BP	GO:0051302	regulation of cell division	34/2038	162/18493	0.000158095	0.0045374	0.00388331	2249/9212/117194/3357/5347/6755/146909/1068/5473/2250/23594/9493/1813/2810/10112/990/84432/9055/2248/1894/641/79733/2069/4192/259266/9928/2254/29127/3552/144455/994/2253/5933/847	34
GO:0019730	BP	GO:0019730	antimicrobial humoral response	27/2038	118/18493	0.000166042	0.00470577	0.00402741	140683/1113/1755/354/6374/80341/130120/81623/6283/57115/5473/51297/92747/1668/5068/2919/8993/4316/6357/5266/671/8346/5646/2243/2920/2244/5967	27
GO:0019228	BP	GO:0019228	neuronal action potential	12/2038	34/18493	0.000166458	0.00470577	0.00402741	4544/1812/2898/8913/54112/8911/6323/2859/6332/27094/3751/1134	12
GO:0048048	BP	GO:0048048	embryonic eye morphogenesis	12/2038	34/18493	0.000166458	0.00470577	0.00402741	6496/655/6664/64220/7020/25806/7054/668/4237/2295/220/5076	12
GO:0048705	BP	GO:0048705	skeletal system morphogenesis	45/2038	236/18493	0.0001685	0.00473979	0.00405652	1280/8092/10736/3227/64399/2249/655/134701/579/2138/3207/4322/6474/3975/3225/4153/7476/1749/9350/1746/6664/7020/3224/3218/64651/7010/4522/3233/3221/56603/3217/6422/3236/3204/176/4188/57453/1311/9496/642658/8785/7763/257/4323/116039	45
GO:0030049	BP	GO:0030049	muscle filament sliding	13/2038	39/18493	0.000174302	0.0048547	0.00415487	7138/7139/88/7136/85366/4626/4621/4620/4703/7137/4606/1756/7169	13
GO:0033275	BP	GO:0033275	actin-myosin filament sliding	13/2038	39/18493	0.000174302	0.0048547	0.00415487	7138/7139/88/7136/85366/4626/4621/4620/4703/7137/4606/1756/7169	13
GO:0009404	BP	GO:0009404	toxin metabolic process	10/2038	25/18493	0.000177016	0.00490611	0.00419887	1544/1543/54905/1491/6770/7054/2327/2326/22977/5446	10
GO:0021520	BP	GO:0021520	spinal cord motor neuron cell fate specification	7/2038	13/18493	0.000183527	0.00501285	0.00429022	167826/3226/64843/3110/3670/3236/8022	7
GO:0031650	BP	GO:0031650	regulation of heat generation	7/2038	13/18493	0.000183527	0.00501285	0.00429022	1268/5743/18/1910/10874/8600/8792	7
GO:0051231	BP	GO:0051231	spindle elongation	7/2038	13/18493	0.000183527	0.00501285	0.00429022	9212/24137/9493/9055/29127/285643/8555	7
GO:0090276	BP	GO:0090276	regulation of peptide hormone secretion	40/2038	203/18493	0.00018529	0.00503669	0.00431062	1393/1113/169026/3358/2044/4544/9515/1946/2696/143425/2641/6755/1813/222546/1268/2922/3670/2740/3710/6616/6513/114131/7021/18/6422/6833/2692/3747/133308/2752/6514/55107/3767/10874/8600/55638/2243/2244/286676/6659	40
GO:0030072	BP	GO:0030072	peptide hormone secretion	46/2038	244/18493	0.000188583	0.00510166	0.00436623	1393/1113/169026/3358/2044/1394/4544/139760/9515/1946/2696/143425/5798/2641/6755/51083/1813/222546/1268/27445/2922/3670/2740/3710/6616/6513/114131/7021/18/6422/6833/2692/7425/3747/133308/2752/6514/55107/3767/10874/8600/55638/2243/2244/286676/6659	46
GO:0051480	BP	GO:0051480	regulation of cytosolic calcium ion concentration	61/2038	350/18493	0.000193018	0.0051746	0.00442866	3358/148/55283/2099/887/4544/22953/1812/2696/6288/10345/3357/799/794/8989/5745/2915/1813/201140/1268/5816/552/56302/147/2740/2902/5030/57113/3710/4828/55584/9170/23566/10803/2903/5026/5737/100133941/2911/10518/10590/6863/2056/2859/6375/5031/134/2904/3060/126306/1910/27112/10874/60675/56477/793/1756/2358/387129/2840/7222	61
GO:0090068	BP	GO:0090068	positive regulation of cell cycle process	52/2038	286/18493	0.000193109	0.0051746	0.00442866	8091/3642/1543/11065/9212/117194/81620/6755/9493/113130/995/891/1813/8318/983/51512/9787/2810/993/1869/990/10403/9401/1894/51514/4085/4582/56979/79733/10733/1820/1761/2069/51203/2146/225689/9928/29127/3552/144455/8317/10615/994/2253/29899/9510/219736/6604/2237/6659/9700/79915	52
GO:0051383	BP	GO:0051383	kinetochore organization	9/2038	21/18493	0.000200721	0.00535318	0.00458149	1058/81620/83540/387103/10403/1063/1062/64105/64946	9
GO:0019226	BP	GO:0019226	transmission of nerve impulse	19/2038	72/18493	0.000217655	0.00577756	0.0049447	4544/1812/2898/8913/54112/4099/552/149461/8911/6323/2859/6332/3060/58524/27092/27094/3751/1134/4916	19
GO:0007051	BP	GO:0007051	spindle organization	34/2038	165/18493	0.000228309	0.00603205	0.0051625	4605/991/9212/5347/7272/24137/83540/284403/9493/891/3833/147872/57405/55889/4751/10403/22974/10460/9055/3832/1062/79000/3925/347688/259266/6491/225689/29127/285643/8555/10615/29899/84722/9700	34
GO:0050804	BP	GO:0050804	modulation of chemical synaptic transmission	70/2038	418/18493	0.000233843	0.00614952	0.00526303	1129/148/2895/114/4885/991/9515/4908/2914/4884/1812/143425/22943/23025/2898/794/2915/1813/2913/22849/1268/4355/22871/7476/22986/6623/6857/6770/2902/5030/3710/6616/85445/1627/9211/5743/4889/7804/1959/8564/3706/5582/18/2903/56853/254263/1949/2911/10590/6863/4909/134/1759/2904/5270/136/2752/3060/27092/140730/440279/10874/793/10675/55638/23316/84628/57689/154/64101	70
GO:0033559	BP	GO:0033559	unsaturated fatty acid metabolic process	24/2038	102/18493	0.000239322	0.00626446	0.00536141	1544/1557/1543/1558/6785/1571/255189/83401/552/1559/79993/59344/1579/1555/242/5740/5743/2180/2171/9536/247/2053/8529/6342	24
GO:0006874	BP	GO:0006874	cellular calcium ion homeostasis	74/2038	448/18493	0.00024193	0.00630357	0.00539488	3358/148/55283/2099/887/4544/22953/1812/2696/6288/10345/3357/799/2898/6387/794/8989/5745/2915/1813/201140/1268/5816/552/56302/84239/147/6368/2740/2902/5030/57113/3710/4828/55584/9170/6358/23566/79734/10803/9914/2903/5026/5737/100133941/6357/2911/10518/10590/6863/2056/2859/6375/5031/134/2904/7137/3060/126306/1910/9900/2053/3792/27112/10874/60675/56477/793/1756/2358/387129/2840/7222/79054	74
GO:0051047	BP	GO:0051047	positive regulation of secretion	68/2038	404/18493	0.000245643	0.00637094	0.00545254	169026/4321/3623/9173/341359/8941/2696/143425/6288/55655/4879/23025/3357/2641/51083/23086/8913/5617/116337/6387/1813/222546/1268/22871/552/2922/1579/114899/6664/3670/6857/8911/4828/242/85480/64109/57126/114131/8564/85477/18/668/29108/1588/27063/2692/6863/3552/134/136/4602/2752/55107/247/1910/8529/10626/6696/10874/1361/112744/8600/55638/2243/2244/286676/8792/6659	68
GO:0051966	BP	GO:0051966	regulation of synaptic transmission, glutamatergic	18/2038	67/18493	0.000248085	0.0064049	0.0054816	2914/1812/22943/23025/2898/2915/1813/2913/1268/22871/6857/5743/8564/2911/134/5270/2752/27092	18
GO:0001660	BP	GO:0001660	fever generation	6/2038	10/18493	0.000251907	0.00641568	0.00549082	1268/5743/3552/1910/8600/8792	6
GO:0006570	BP	GO:0006570	tyrosine metabolic process	6/2038	10/18493	0.000251907	0.00641568	0.00549082	7054/3242/6898/389434/2954/5053	6
GO:0051256	BP	GO:0051256	mitotic spindle midzone assembly	6/2038	10/18493	0.000251907	0.00641568	0.00549082	9212/24137/9493/29127/285643/8555	6
GO:0072073	BP	GO:0072073	kidney epithelium development	30/2038	140/18493	0.000256593	0.00649357	0.00555749	168667/10736/2302/3237/655/2138/3207/7477/7827/3975/9350/5979/2297/7021/79633/3217/6422/255743/100133941/8842/153572/2253/4072/5076/6943/2719/793/4435/847/170690	30
GO:0007093	BP	GO:0007093	mitotic cell cycle checkpoint	34/2038	166/18493	0.000257262	0.00649357	0.00555749	8091/991/9212/9319/5347/81620/7272/90381/995/891/146956/983/701/4998/51512/2810/699/1869/7153/990/10403/63967/1063/11130/641/4085/4582/79733/1820/144455/9735/54908/6659/1843	34
GO:0007292	BP	GO:0007292	female gamete generation	29/2038	134/18493	0.000270243	0.00679089	0.00581195	54937/174/163589/56776/9319/5347/7130/7272/891/147872/23397/7153/402381/268/342977/5743/1761/2069/668/347688/259266/11144/54852/994/339834/9510/254528/84515/51087	29
GO:0050808	BP	GO:0050808	synapse organization	65/2038	384/18493	0.000283572	0.00709433	0.00607165	114798/1007/84189/9723/2823/2895/991/1821/1501/1946/22953/4747/7477/1812/22943/23025/124925/26059/2915/1813/22871/53942/7476/27445/3675/6623/84694/2902/92737/79012/22865/85445/7804/6620/3706/8404/1496/1826/57622/2049/2596/26280/10243/1741/54674/2904/26050/392617/4009/10882/375323/440279/1134/2239/11202/387804/10397/55638/23316/84628/654429/57689/4916/78999/64101	65
GO:0090102	BP	GO:0090102	cochlea development	14/2038	46/18493	0.000293606	0.00726268	0.00621572	84189/3776/2138/890/57216/4171/5456/53904/2535/5754/115908/5076/246213/4916	14
GO:0044706	BP	GO:0044706	multi-multicellular organism process	42/2038	221/18493	0.000293742	0.00726268	0.00621572	1393/5858/10876/1515/2099/1543/1394/7356/2354/340784/6866/5744/2353/5617/1268/552/1828/3675/4318/1364/5740/5743/151/6513/367/2834/6833/5737/3641/54407/1723/4316/6863/2056/5270/780/2192/6696/27120/6013/23641/1833	42
GO:1902751	BP	GO:1902751	positive regulation of cell cycle G2/M phase transition	11/2038	31/18493	0.000294155	0.00726268	0.00621572	995/891/983/993/9401/51514/8317/994/219736/6604/79915	11
GO:0007626	BP	GO:0007626	locomotory behavior	38/2038	194/18493	0.000299847	0.00737103	0.00630846	7345/3358/84189/55283/127343/84152/1621/1812/124925/54112/6387/2915/2775/1813/4886/6623/2571/2902/6616/3218/6323/2019/4929/7054/18/5309/3236/1826/1949/57282/2911/4909/58524/220/4009/10882/3751/793	38
GO:0051187	BP	GO:0051187	cofactor catabolic process	18/2038	68/18493	0.000303087	0.00741841	0.00634901	3046/50506/3043/54657/3045/54658/3240/3042/3049/3040/124975/874/4025/554235/8529/53905/847/644	18
GO:0035136	BP	GO:0035136	forelimb morphogenesis	13/2038	41/18493	0.000306263	0.00743978	0.0063673	340419/3207/6474/7476/7020/2019/7021/27164/494470/3236/257/6926/116039	13
GO:0042573	BP	GO:0042573	retinoic acid metabolic process	9/2038	22/18493	0.000306591	0.00743978	0.0063673	1592/1543/83875/54658/56603/54659/64577/220/54577	9
GO:0035137	BP	GO:0035137	hindlimb morphogenesis	12/2038	36/18493	0.000308092	0.00744425	0.00637112	2249/340419/5307/7476/7021/27164/3236/2253/2719/257/6926/116039	12
GO:0051260	BP	GO:0051260	protein homooligomerization	57/2038	328/18493	0.000331873	0.00798472	0.00683368	27012/170850/22953/286133/386617/5315/10562/55/3746/1491/8989/3754/735/5888/4355/22871/88/8739/56302/6510/10721/6857/3752/3710/6580/8001/1894/9211/641/4143/6506/493829/79734/7083/6505/3755/29108/33/2203/3747/2752/220/915/9641/30845/3751/226/1807/6999/5009/8600/387804/6569/847/286676/5967/79054	57
GO:0010951	BP	GO:0010951	negative regulation of endopeptidase activity	46/2038	250/18493	0.000333609	0.00799248	0.00684032	26952/5858/10047/80760/27290/6318/10879/332/79444/9232/347365/59082/140832/5276/153218/4102/6317/2810/128817/1469/6692/4018/4318/27344/340267/5743/1447/5896/5973/1472/7021/4804/5274/10653/6653/5266/89932/256394/284293/5270/1470/7057/5076/135228/286204/7078	46
GO:0006720	BP	GO:0006720	isoprenoid metabolic process	27/2038	123/18493	0.00034028	0.0080838	0.00691848	1592/1544/1557/1576/1543/83875/127/5948/1571/9227/1559/54658/6770/64220/50700/7804/221914/7054/56603/54659/5959/64577/220/2719/2239/54577/285440	27
GO:0016079	BP	GO:0016079	synaptic vesicle exocytosis	27/2038	123/18493	0.00034028	0.0080838	0.00691848	1129/341359/148/9515/1812/143425/90019/23025/57586/8618/26059/1813/1268/22871/7476/27445/6857/5030/6616/5582/136/8448/140730/9900/440279/9751/10675	27
GO:0000075	BP	GO:0000075	cell cycle checkpoint	41/2038	216/18493	0.000353595	0.00830278	0.00710589	8091/991/9212/9319/5347/81620/7272/90381/995/891/8318/146956/983/701/4998/51512/2810/699/1869/7153/990/10403/6664/63967/1063/11130/641/51514/4085/4582/79733/1820/3014/1111/8555/144455/9735/79968/54908/6659/1843	41
GO:0007584	BP	GO:0007584	response to nutrient	41/2038	216/18493	0.000353595	0.00830278	0.00710589	6750/1592/655/8074/1543/57817/2348/22953/2696/5315/1591/5617/9227/1268/54658/5251/6770/2902/5030/7274/5743/53335/2180/56603/429/3208/6422/7298/5026/1723/10518/2056/3767/6696/1728/56477/5009/6569/847/7222/594	41
GO:0001890	BP	GO:0001890	placenta development	31/2038	149/18493	0.000353903	0.00830278	0.00710589	84870/655/1045/1515/10761/7477/58495/3880/1634/7472/400629/6692/7274/5740/5743/79733/10733/113026/653/899/4693/9021/10653/3491/4188/3696/144455/8022/6696/4435/23641	31
GO:0006706	BP	GO:0006706	steroid catabolic process	10/2038	27/18493	0.000371517	0.00867999	0.00742872	1544/1576/8074/51302/1591/6718/1588/6716/8630/6696	10
GO:0043268	BP	GO:0043268	positive regulation of potassium ion transport	14/2038	47/18493	0.000376205	0.00875334	0.0074915	1812/3757/51083/3746/65268/219527/389816/88/6833/440699/23630/3747/134/27347	14
GO:0018958	BP	GO:0018958	phenol-containing compound metabolic process	23/2038	99/18493	0.000388646	0.00900575	0.00770752	3642/1621/50506/1812/4948/6870/405753/1813/7306/7038/27284/6770/4929/6620/7054/18/2903/389434/7166/53905/4435/6528/5053	23
GO:1902476	BP	GO:1902476	chloride transmembrane transport	21/2038	87/18493	0.000396129	0.00914168	0.00782386	1179/5349/2555/7809/57348/2556/2569/115019/2566/6557/2568/6521/9022/1188/1364/8001/22802/55879/6505/55107/7439	21
GO:0046683	BP	GO:0046683	response to organophosphorus	29/2038	137/18493	0.000399892	0.00917224	0.00785001	1393/2354/10021/22953/50506/5798/2353/5105/6770/5030/366/5743/7010/5138/15/7298/5026/7425/10518/5031/3767/10626/53905/4435/6528/5972/2819/1843/7222	29
GO:0008608	BP	GO:0008608	attachment of spindle microtubules to kinetochore	11/2038	32/18493	0.000403942	0.00917224	0.00785001	11004/9212/81620/83540/891/4751/10403/1062/1894/29127/10615	11
GO:0009954	BP	GO:0009954	proximal/distal pattern formation	11/2038	32/18493	0.000403942	0.00917224	0.00785001	6496/3227/3226/3207/221833/1746/1745/2019/56603/3236/153572	11
GO:0042744	BP	GO:0042744	hydrogen peroxide catabolic process	11/2038	32/18493	0.000403942	0.00917224	0.00785001	3046/50506/3043/3045/3240/3042/3049/3040/4025/53905/847	11
GO:0002009	BP	GO:0002009	morphogenesis of an epithelium	77/2038	479/18493	0.000428139	0.00968278	0.00828696	2658/768/10481/8092/10736/64399/4321/3237/9723/84870/340419/655/10660/2138/2099/3207/57057/2348/1482/7477/89958/58495/22943/3239/3975/8456/7472/7476/5979/6692/57216/6664/80144/7020/147183/4522/10371/2297/367/131405/653/79633/3217/6422/255743/9021/25928/6491/10653/2535/3491/57167/1741/5754/153572/9496/4300/2253/115908/2295/2637/780/220/219736/284217/5076/6943/2719/3872/2239/388/4323/4435/6926/6659…	77
GO:0001505	BP	GO:0001505	regulation of neurotransmitter levels	59/2038	346/18493	0.000436163	0.00982496	0.00840864	1129/6530/341359/148/2555/9515/6512/2914/1621/1812/143425/90019/23025/57586/2572/8618/26059/1813/1268/22871/7476/27445/3043/6623/29958/6857/2571/5030/10249/6616/9152/5740/5743/6506/8564/7054/5582/18/6505/2903/64902/635/133121/6095/136/2752/8448/3060/140730/7166/9900/440279/1728/1807/9751/10675/60482/6542/5053	59
GO:0051412	BP	GO:0051412	response to corticosterone	9/2038	23/18493	0.000454685	0.0102015	0.00873094	2354/4747/2353/552/6770/114131/7054/15/4916	9
GO:0007611	BP	GO:0007611	learning or memory	45/2038	247/18493	0.000480638	0.0107412	0.00919282	1393/431707/3776/114/4885/84152/4908/1621/1812/22943/2334/2353/54112/2915/1813/2925/22849/1268/3675/22986/2740/2902/3710/6616/64220/5743/2019/5896/1959/54207/7054/5582/2903/4192/6833/100132074/6863/4909/2904/4009/10882/793/2237/11202/23316	45
GO:0006558	BP	GO:0006558	L-phenylalanine metabolic process	6/2038	11/18493	0.000502438	0.0109261	0.00935105	259307/3242/6898/80150/2954/5053	6
GO:0006559	BP	GO:0006559	L-phenylalanine catabolic process	6/2038	11/18493	0.000502438	0.0109261	0.00935105	259307/3242/6898/80150/2954/5053	6
GO:0021892	BP	GO:0021892	cerebral cortex GABAergic interneuron differentiation	6/2038	11/18493	0.000502438	0.0109261	0.00935105	1812/1813/1746/1745/170302/429	6
GO:0031652	BP	GO:0031652	positive regulation of heat generation	6/2038	11/18493	0.000502438	0.0109261	0.00935105	1268/5743/18/10874/8600/8792	6
GO:0060272	BP	GO:0060272	embryonic skeletal joint morphogenesis	6/2038	11/18493	0.000502438	0.0109261	0.00935105	1280/3227/655/3207/6474/116039	6
GO:1902221	BP	GO:1902221	erythrose 4-phosphate/phosphoenolpyruvate family amino acid metabolic process	6/2038	11/18493	0.000502438	0.0109261	0.00935105	259307/3242/6898/80150/2954/5053	6
GO:1902222	BP	GO:1902222	erythrose 4-phosphate/phosphoenolpyruvate family amino acid catabolic process	6/2038	11/18493	0.000502438	0.0109261	0.00935105	259307/3242/6898/80150/2954/5053	6
GO:0071103	BP	GO:0071103	DNA conformation change	50/2038	283/18493	0.000506594	0.0109743	0.00939227	8091/645996/64591/1058/79019/8438/113130/387103/55355/891/8318/64151/983/5888/55723/80119/8208/9837/23397/7153/9401/2491/11339/4171/1029/641/64105/3009/51659/56979/128312/23569/51203/64946/84296/3007/4176/3070/79682/3014/79172/91687/3159/8346/341567/8352/8360/8354/4175/9918	50
GO:0021983	BP	GO:0021983	pituitary gland development	13/2038	43/18493	0.000515131	0.0111166	0.00951408	190/5308/6496/50506/5307/23440/1813/3670/6657/5454/2692/2253/8022	13
GO:0001964	BP	GO:0001964	startle response	10/2038	28/18493	0.000521249	0.0111213	0.00951809	84189/2895/1812/1813/64478/2902/1496/2903/2173/4861	10
GO:0009074	BP	GO:0009074	aromatic amino acid family catabolic process	10/2038	28/18493	0.000521249	0.0111213	0.00951809	259307/51166/8564/3242/131669/6898/80150/2954/6999/5053	10
GO:0010971	BP	GO:0010971	positive regulation of G2/M transition of mitotic cell cycle	10/2038	28/18493	0.000521249	0.0111213	0.00951809	995/891/983/993/9401/51514/8317/994/219736/6604	10
GO:0021537	BP	GO:0021537	telencephalon development	45/2038	248/18493	0.000525815	0.0111765	0.00956538	6496/8941/2044/4747/1812/3975/389549/4852/284403/6387/1813/552/1749/1746/1745/2902/10460/170302/5992/8013/6513/7804/6506/10371/5454/7054/27164/79633/10642/429/84879/4192/259266/2146/6716/54407/2049/9928/64211/3014/89839/26050/2253/220/4009	45
GO:0050806	BP	GO:0050806	positive regulation of synaptic transmission	32/2038	159/18493	0.000530982	0.0112441	0.0096232	148/1812/143425/23025/2898/794/1813/1268/4355/22871/7476/6857/2902/3710/6616/9211/5743/8564/18/2903/10590/6863/134/2904/5270/2752/27092/140730/10874/793/23316/154	32
GO:0060562	BP	GO:0060562	epithelial tube morphogenesis	54/2038	313/18493	0.000560972	0.0118023	0.010101	2658/8092/10736/64399/3237/9723/340419/655/10660/2138/2099/3207/57057/2348/1482/58495/3975/7472/5979/6692/57216/6664/4522/2297/367/131405/653/79633/3217/6422/255743/25928/6491/10653/2535/57167/5754/153572/2253/115908/2637/780/219736/284217/5076/6943/2719/388/4323/4435/6926/6659/170690/55897	54
GO:0009812	BP	GO:0009812	flavonoid metabolic process	7/2038	15/18493	0.000563606	0.0118023	0.010101	54575/1543/27284/54657/54658/54659/54577	7
GO:0015671	BP	GO:0015671	oxygen transport	7/2038	15/18493	0.000563606	0.0118023	0.010101	3046/3043/3045/3042/3049/3040/58157	7
GO:0017156	BP	GO:0017156	calcium ion regulated exocytosis	31/2038	153/18493	0.000570998	0.011913	0.0101957	1129/341359/148/8941/9515/1812/143425/90019/23025/57586/8913/8618/26059/1813/1268/22871/7476/27445/6857/5030/8911/6616/5582/85477/136/8448/140730/9900/440279/9751/10675	31
GO:1901568	BP	GO:1901568	fatty acid derivative metabolic process	32/2038	160/18493	0.000594941	0.0123669	0.0105841	1544/1557/1543/1558/54511/6785/1571/255189/7306/83401/552/1559/79993/59344/1579/1555/23305/242/5740/5743/2180/10998/2171/9536/51703/247/124975/2053/123876/8529/5446/4363	32
GO:0050890	BP	GO:0050890	cognition	50/2038	285/18493	0.000597676	0.0123782	0.0105939	1393/431707/3776/114/4885/84152/4908/1621/1812/22943/2334/2353/54112/2915/1128/1813/2925/22849/1268/3675/22986/2740/2902/3710/6616/64220/5743/2019/5896/1959/54207/7054/5582/2903/4192/6833/7991/100132074/6863/4909/134/2904/874/4009/10882/28983/793/2237/11202/23316	50
GO:0030902	BP	GO:0030902	hindbrain development	30/2038	147/18493	0.000612923	0.0126477	0.0108245	6753/256297/655/2895/8941/124925/3975/3746/2020/7476/5013/1272/2902/2019/1959/653/1496/18/429/388610/4192/2146/9928/64211/6095/5270/2637/4009/6752/23026	30
GO:0021549	BP	GO:0021549	cerebellum development	22/2038	96/18493	0.000628675	0.0129256	0.0110623	6753/256297/2895/8941/124925/3975/3746/7476/1272/2019/18/388610/4192/2146/9928/64211/6095/5270/2637/4009/6752/23026	22
GO:0045137	BP	GO:0045137	development of primary sexual characteristics	41/2038	222/18493	0.00063132	0.0129329	0.0110686	174/190/431707/3623/117154/1515/56311/2099/3207/64591/5798/56159/81930/400629/4521/268/84733/6770/10371/367/1761/2069/1602/668/6422/259266/1588/6716/2254/7425/11144/3972/642658/2253/9510/6943/4323/2189/5972/269/9468	41
GO:0048489	BP	GO:0048489	synaptic vesicle transport	31/2038	154/18493	0.000640896	0.0129726	0.0111025	1129/341359/148/9515/1812/143425/90019/23025/57586/3798/8618/26059/1813/1268/22871/7476/27445/6857/5030/6616/5582/80128/254263/1759/136/8448/140730/9900/440279/9751/10675	31
GO:0097480	BP	GO:0097480	establishment of synaptic vesicle localization	31/2038	154/18493	0.000640896	0.0129726	0.0111025	1129/341359/148/9515/1812/143425/90019/23025/57586/3798/8618/26059/1813/1268/22871/7476/27445/6857/5030/6616/5582/80128/254263/1759/136/8448/140730/9900/440279/9751/10675	31
GO:0033555	BP	GO:0033555	multicellular organismal response to stress	18/2038	72/18493	0.000642435	0.0129726	0.0111025	6530/3358/1621/22953/1812/2898/5617/8989/55515/116372/5979/5896/4929/5582/4192/6863/7057/1910	18
GO:1901616	BP	GO:1901616	organic hydroxy compound catabolic process	18/2038	72/18493	0.000642435	0.0129726	0.0111025	222/8074/1621/51302/127/1591/27284/55586/1579/6718/27124/9108/217/54363/6822/6652/8529/197257	18
GO:0098659	BP	GO:0098659	inorganic cation import across plasma membrane	19/2038	78/18493	0.000651331	0.0130589	0.0111764	10021/799/6557/56302/495/480/10060/486/3769/3773/6549/3767/478/27112/285335/6569/23516/284525/389015	19
GO:0099587	BP	GO:0099587	inorganic ion import across plasma membrane	19/2038	78/18493	0.000651331	0.0130589	0.0111764	10021/799/6557/56302/495/480/10060/486/3769/3773/6549/3767/478/27112/285335/6569/23516/284525/389015	19
GO:0042738	BP	GO:0042738	exogenous drug catabolic process	9/2038	24/18493	0.000656816	0.0131044	0.0112153	1544/1557/1576/1558/1571/54905/1559/1555/8856	9
GO:0007080	BP	GO:0007080	mitotic metaphase plate congression	13/2038	44/18493	0.000658234	0.0131044	0.0112153	11004/81620/83540/113130/81930/891/3833/55143/10403/1062/9928/84722/54908	13
GO:0050954	BP	GO:0050954	sensory perception of mechanical stimulus	32/2038	161/18493	0.000665589	0.0132044	0.0113009	1280/124590/84189/5077/2138/332/22953/50617/6387/8989/53942/2070/55584/5456/7020/53904/6323/7054/79955/4693/4640/117532/65217/113278/5270/644168/10804/1302/525/246213/51473/84530	32
GO:0006323	BP	GO:0006323	DNA packaging	39/2038	209/18493	0.000687021	0.0135819	0.011624	8091/645996/64591/1058/79019/113130/387103/55355/891/64151/983/55723/8208/23397/7153/2491/11339/4171/1029/64105/3009/56979/128312/23569/51203/64946/3007/3070/79682/3014/79172/91687/3159/8346/341567/8352/8360/8354/9918	39
GO:0048732	BP	GO:0048732	gland development	70/2038	434/18493	0.000694711	0.0136861	0.0117131	10481/190/5308/6496/256297/3642/655/3219/2099/1543/887/57817/1482/7477/50506/5307/3239/5315/9133/5617/23440/79152/1813/8456/7472/7038/5105/768239/8835/54658/3670/3321/440/64220/6657/1447/5896/10371/5454/79733/367/429/4192/6422/2146/25928/7298/1588/2049/1723/2692/144455/5270/2253/247/26257/780/220/8022/7166/284217/1361/6943/5009/8600/128239/6926/8792/5967/55897	70
GO:0021884	BP	GO:0021884	forebrain neuron development	10/2038	29/18493	0.000717671	0.0140893	0.0120582	431707/1812/1813/170302/10371/6656/27164/57282/2253/2637	10
GO:0007204	BP	GO:0007204	positive regulation of cytosolic calcium ion concentration	53/2038	309/18493	0.000721686	0.0141191	0.0120837	3358/148/55283/2099/887/22953/1812/2696/6288/10345/3357/799/8989/5745/1813/201140/1268/552/56302/147/2740/2902/5030/3710/4828/55584/9170/23566/10803/2903/5026/5737/100133941/2911/10518/6863/2056/2859/6375/5031/2904/3060/126306/1910/27112/10874/60675/56477/1756/2358/387129/2840/7222	53
GO:0072329	BP	GO:0072329	monocarboxylic acid catabolic process	27/2038	129/18493	0.000748114	0.0145856	0.012483	1592/51302/1268/5105/1579/84129/56603/6718/18/64902/2110/80150/1962/33/112817/54363/6822/6652/8529/84696/6342/10449/5446/11001/197257/23600/34	27
GO:0051384	BP	GO:0051384	response to glucocorticoid	30/2038	149/18493	0.000773797	0.0150345	0.0128672	6753/1515/2354/4747/7477/799/6755/4654/2353/552/5105/54658/3670/6770/5743/2308/114131/7054/4192/15/6898/7298/7538/3557/2692/2056/84676/6752/1843/4916	30
GO:0007620	BP	GO:0007620	copulation	8/2038	20/18493	0.000797094	0.0154342	0.0132092	10876/1268/552/18/5266/6863/5270/1910	8
GO:0034508	BP	GO:0034508	centromere complex assembly	15/2038	56/18493	0.000822471	0.0158172	0.0135371	1058/79019/387103/55355/2491/1063/11339/1062/64105/64946/3070/79682/79172/91687/8360	15
GO:0045143	BP	GO:0045143	homologous chromosome segregation	15/2038	56/18493	0.000822471	0.0158172	0.0135371	56154/56776/898/9232/9319/5347/56159/147872/84944/2177/11144/339834/10609/254528/9700	15
GO:0048754	BP	GO:0048754	branching morphogenesis of an epithelial tube	30/2038	150/18493	0.00086728	0.0166193	0.0142235	2658/10736/64399/3237/9723/340419/655/2138/2099/3207/57057/3975/7472/57216/2297/367/79633/3217/255743/2253/2637/780/284217/5076/6943/2719/4323/4435/6926/170690	30
GO:0006027	BP	GO:0006027	glycosaminoglycan catabolic process	16/2038	62/18493	0.000870245	0.0166193	0.0142235	55576/10894/23553/57115/1634/254773/221914/3161/4958/8993/176/60495/4969/2719/10675/2239	16
GO:0016101	BP	GO:0016101	diterpenoid metabolic process	21/2038	92/18493	0.000872997	0.0166193	0.0142235	1592/1543/83875/127/5948/9227/54658/6770/64220/50700/7804/221914/56603/54659/5959/64577/220/2719/2239/54577/285440	21
GO:0001523	BP	GO:0001523	retinoid metabolic process	20/2038	86/18493	0.000894604	0.0169735	0.0145266	1592/1543/83875/127/5948/9227/54658/64220/50700/7804/221914/56603/54659/5959/64577/220/2719/2239/54577/285440	20
GO:0051303	BP	GO:0051303	establishment of chromosome localization	18/2038	74/18493	0.000909864	0.0170602	0.0146009	56776/11004/81620/83540/113130/81930/891/3833/147872/55143/9787/10403/1063/1062/9928/10615/84722/54908	18
GO:0003207	BP	GO:0003207	cardiac chamber formation	6/2038	12/18493	0.000911248	0.0170602	0.0146009	57057/1482/6664/6604/6659/55897	6
GO:0042908	BP	GO:0042908	xenobiotic transport	6/2038	12/18493	0.000911248	0.0170602	0.0146009	340273/10351/6513/9429/4363/8856	6
GO:1904668	BP	GO:1904668	positive regulation of ubiquitin protein ligase activity	6/2038	12/18493	0.000911248	0.0170602	0.0146009	991/11065/5347/27338/166979/8555	6
GO:0015721	BP	GO:0015721	bile acid and bile salt transport	9/2038	25/18493	0.000926704	0.0172924	0.0147996	28234/338821/366/80765/10599/201780/8647/10998/6554	9
GO:0007143	BP	GO:0007143	female meiotic nuclear division	10/2038	30/18493	0.000971201	0.0180631	0.0154592	56776/9319/5347/7272/23397/7153/2069/347688/994/254528	10
GO:0051310	BP	GO:0051310	metaphase plate congression	15/2038	57/18493	0.00100414	0.0186145	0.0159311	11004/81620/83540/113130/81930/891/3833/55143/10403/1063/1062/9928/10615/84722/54908	15
GO:0072080	BP	GO:0072080	nephron tubule development	21/2038	93/18493	0.00101259	0.0187098	0.0160127	10736/3237/2138/3207/7477/3975/2297/7021/79633/3217/255743/100133941/8842/153572/2253/5076/6943/2719/793/4435/170690	21
GO:0006855	BP	GO:0006855	drug transmembrane transport	20/2038	87/18493	0.0010434	0.0192163	0.0164462	6512/340273/2348/83959/6535/6510/6580/64220/10351/9152/6506/6561/64849/6505/284111/9429/246213/56918/6542/4363	20
GO:0003012	BP	GO:0003012	muscle system process	72/2038	456/18493	0.00106983	0.019639	0.016808	27302/1113/1129/7138/148/29119/8877/57057/3781/10021/57817/22953/1482/6588/1812/3757/6870/10345/3357/4654/2539/8913/2775/1813/8735/7139/88/6535/147/3752/4619/7136/10911/8013/6323/5743/151/2308/85366/4626/493829/18/51761/4621/255743/2146/6833/4620/4703/124093/23630/1311/134/6332/136/7137/1144/126306/1910/30845/10874/60675/226/59272/1134/84676/4606/1756/7169/6752/154/7222	72
GO:0050000	BP	GO:0050000	chromosome localization	18/2038	75/18493	0.00107591	0.0196832	0.0168458	56776/11004/81620/83540/113130/81930/891/3833/147872/55143/9787/10403/1063/1062/9928/10615/84722/54908	18
GO:0006865	BP	GO:0006865	amino acid transport	27/2038	132/18493	0.0010792	0.0196832	0.0168458	55117/56301/11254/6512/4948/552/6535/6510/6857/9152/4889/6506/8564/18/6505/153201/27165/54407/6539/55089/134/9900/6540/59272/246213/27347/6542	27
GO:1901989	BP	GO:1901989	positive regulation of cell cycle phase transition	22/2038	100/18493	0.00112266	0.0204101	0.0174679	1543/11065/81620/113130/995/891/8318/983/9787/993/990/9401/51514/2146/225689/8317/994/9510/219736/6604/9700/79915	22
GO:0015872	BP	GO:0015872	dopamine transport	14/2038	52/18493	0.00114946	0.0208294	0.0178268	6530/341359/1812/143425/90019/57586/6387/1813/1268/6623/6857/6580/18/225689	14
GO:0003009	BP	GO:0003009	skeletal muscle contraction	12/2038	41/18493	0.0011531	0.0208294	0.0178268	7138/7139/7136/4626/51761/4621/124093/7137/1144/126306/1134/1756	12
GO:0060713	BP	GO:0060713	labyrinthine layer morphogenesis	8/2038	21/18493	0.00116409	0.0209611	0.0179395	84870/655/7477/6692/653/9021/10653/3491	8
GO:0006275	BP	GO:0006275	regulation of DNA replication	23/2038	107/18493	0.00122372	0.0219648	0.0187985	2658/345643/81620/90381/983/890/990/9401/641/79733/57379/2069/1602/6282/157570/389643/5984/144455/8317/3060/63922/79075/79915	23
GO:0050795	BP	GO:0050795	regulation of behavior	16/2038	64/18493	0.00125787	0.0223876	0.0191603	339403/4544/6870/3357/1813/1268/22871/64220/8013/85445/5896/4192/2692/134/3953/10874	16
GO:0070192	BP	GO:0070192	chromosome organization involved in meiotic cell cycle	16/2038	64/18493	0.00125787	0.0223876	0.0191603	56154/898/9319/56159/147872/5888/701/23397/699/84944/2177/11144/339834/10609/254528/9918	16
GO:0007269	BP	GO:0007269	neurotransmitter secretion	32/2038	167/18493	0.00126541	0.0223876	0.0191603	1129/341359/148/9515/2914/1812/143425/90019/23025/57586/8618/26059/1813/1268/22871/7476/27445/6623/6857/5030/6616/8564/5582/136/8448/3060/140730/9900/440279/9751/10675/60482	32
GO:0099643	BP	GO:0099643	signal release from synapse	32/2038	167/18493	0.00126541	0.0223876	0.0191603	1129/341359/148/9515/2914/1812/143425/90019/23025/57586/8618/26059/1813/1268/22871/7476/27445/6623/6857/5030/6616/8564/5582/136/8448/3060/140730/9900/440279/9751/10675/60482	32
GO:0034308	BP	GO:0034308	primary alcohol metabolic process	18/2038	76/18493	0.00126707	0.0223876	0.0191603	1585/222/127/125/9227/27284/126/130/50700/124/653/5959/217/54363/6822/220/84532/2819	18
GO:0021846	BP	GO:0021846	cell proliferation in forebrain	9/2038	26/18493	0.00127999	0.0224236	0.0191911	6496/7476/170302/5454/10642/9928/64211/2253/2173	9
GO:0048596	BP	GO:0048596	embryonic camera-type eye morphogenesis	9/2038	26/18493	0.00127999	0.0224236	0.0191911	6496/655/6664/64220/7020/7054/2295/220/5076	9
GO:0010959	BP	GO:0010959	regulation of metal ion transport	61/2038	376/18493	0.00128101	0.0224236	0.0191911	5349/1394/4544/3781/57817/22953/1482/6588/1812/3757/10345/799/2641/51083/3746/2539/51297/6387/65268/219527/389816/2775/1813/201140/342667/88/1272/57628/2902/5743/486/23566/3755/3208/9454/6833/5026/128414/117532/440699/23630/2056/2859/6375/5031/3747/134/154215/5270/3060/126306/283229/30845/6271/3792/1756/7439/27347/387129/154/7222	61
GO:0015837	BP	GO:0015837	amine transport	22/2038	101/18493	0.00128872	0.022489	0.0192471	1113/341359/1812/143425/90019/57586/6387/1813/1268/552/6623/6857/366/4889/151/8564/7054/18/134/9900/59272/27347	22
GO:0030431	BP	GO:0030431	sleep	10/2038	31/18493	0.0012936	0.0225047	0.0192606	4544/117194/2353/1813/6770/8911/2903/2692/134/10874	10
GO:1901605	BP	GO:1901605	alpha-amino acid metabolic process	40/2038	223/18493	0.00130403	0.0225486	0.0192981	1159/54511/2572/259307/1491/51166/112399/6535/2690/2571/92292/10249/440/548596/5831/4143/4522/8564/7054/23569/4329/64902/3242/131669/27165/6898/80150/112817/635/389434/4942/2752/10157/2954/443/6999/5009/23057/137872/5053	40
GO:0032355	BP	GO:0032355	response to estradiol	26/2038	127/18493	0.0013041	0.0225486	0.0192981	1393/1544/6753/655/2099/6870/4654/5617/81930/890/7476/8835/54658/5743/7054/6422/2146/5737/9915/3767/1728/6752/6569/847/3015/1843	26
GO:0061326	BP	GO:0061326	renal tubule development	21/2038	95/18493	0.00135003	0.0232715	0.0199168	10736/3237/2138/3207/7477/3975/2297/7021/79633/3217/255743/100133941/8842/153572/2253/5076/6943/2719/793/4435/170690	21
GO:0006271	BP	GO:0006271	DNA strand elongation involved in DNA replication	7/2038	17/18493	0.00139602	0.0239185	0.0204705	9837/51659/10535/84296/5984/2237/64785	7
GO:0051923	BP	GO:0051923	sulfation	7/2038	17/18493	0.00139602	0.0239185	0.0204705	27284/10090/23563/6819/9953/6822/222537	7
GO:0007131	BP	GO:0007131	reciprocal meiotic recombination	14/2038	53/18493	0.00140606	0.0239454	0.0204935	9319/56159/146956/5888/400629/7153/84057/641/56979/158401/11144/164045/254528/29893	14
GO:0035825	BP	GO:0035825	homologous recombination	14/2038	53/18493	0.00140606	0.0239454	0.0204935	9319/56159/146956/5888/400629/7153/84057/641/56979/158401/11144/164045/254528/29893	14
GO:0030534	BP	GO:0030534	adult behavior	28/2038	141/18493	0.00141702	0.0240596	0.0205913	1393/7345/114798/84189/127343/84152/1621/1812/124925/2566/4852/6387/1813/6623/2902/8013/3218/6323/680/2019/4929/6506/18/3236/1949/4909/26050/58524	28
GO:0035270	BP	GO:0035270	endocrine system development	26/2038	128/18493	0.00146842	0.0248576	0.0212742	190/5308/6496/3642/4821/3110/1482/50506/5307/2696/23440/1813/222546/7038/3670/64220/6657/2308/5454/653/429/4192/2692/2253/8022/6659	26
GO:0021675	BP	GO:0021675	nerve development	18/2038	77/18493	0.00148631	0.0250854	0.0214692	84189/4821/1515/84570/4908/4884/23025/5979/3670/7020/10371/1959/5582/494470/4909/5270/644168/5076	18
GO:2001259	BP	GO:2001259	positive regulation of cation channel activity	16/2038	65/18493	0.00150075	0.0252373	0.0215992	10345/51083/3746/219527/389816/342667/88/6833/440699/5031/3747/27092/3767/30845/6271/154	16
GO:0061844	BP	GO:0061844	antimicrobial humoral immune response mediated by antimicrobial peptide	17/2038	71/18493	0.00150424	0.0252373	0.0215992	354/6374/130120/81623/6283/57115/5473/51297/1668/5068/2919/8993/4316/6357/8346/2920/5967	17
GO:0009111	BP	GO:0009111	vitamin catabolic process	6/2038	13/18493	0.00153501	0.0256016	0.021911	1592/8074/1591/56603/874/8529	6
GO:0051255	BP	GO:0051255	spindle midzone assembly	6/2038	13/18493	0.00153501	0.0256016	0.021911	9212/24137/9493/29127/285643/8555	6
GO:0021543	BP	GO:0021543	pallium development	32/2038	169/18493	0.00155009	0.0257771	0.0220612	8941/2044/4747/1812/4852/284403/1746/1745/2902/10460/170302/8013/6513/7804/10371/5454/7054/79633/10642/429/84879/4192/259266/2146/6716/54407/9928/64211/3014/89839/2253/4009	32
GO:0061564	BP	GO:0061564	axon development	76/2038	493/18493	0.00155819	0.0258358	0.0221114	7345/114798/84189/9723/64843/655/11023/84570/2044/4741/6474/1946/2348/4747/4884/56896/3975/3798/389549/6387/1813/4099/1268/7476/1749/5979/57216/3670/2902/10381/22865/10090/170302/8013/9211/4684/25806/4929/10371/1959/2297/5454/3925/23566/80128/2674/4804/1496/51761/6277/494470/1826/1949/2049/2596/84894/57453/5354/26050/2253/26257/644168/2637/780/8022/4009/3792/6696/5076/9048/11202/84628/84665/57689…	76
GO:0072009	BP	GO:0072009	nephron epithelium development	23/2038	109/18493	0.00158826	0.0262574	0.0224723	10736/2302/3237/2138/3207/7477/7827/3975/2297/7021/79633/3217/255743/100133941/8842/153572/2253/5076/6943/2719/793/4435/170690	23
GO:0031055	BP	GO:0031055	chromatin remodeling at centromere	13/2038	48/18493	0.00160834	0.0263582	0.0225585	1058/79019/387103/55355/2491/11339/64105/64946/3070/79682/79172/91687/8360	13
GO:0051445	BP	GO:0051445	regulation of meiotic cell cycle	13/2038	48/18493	0.00160834	0.0263582	0.0225585	991/9319/7272/995/993/56979/1761/259266/225689/286151/994/339834/1843	13
GO:0060711	BP	GO:0060711	labyrinthine layer development	13/2038	48/18493	0.00160834	0.0263582	0.0225585	84870/655/1045/7477/58495/7472/6692/113026/653/9021/10653/3491/4435	13
GO:0007530	BP	GO:0007530	sex determination	8/2038	22/18493	0.0016541	0.0267973	0.0229343	190/268/367/1761/668/2254/6943/3645	8
GO:0010842	BP	GO:0010842	retina layer formation	8/2038	22/18493	0.0016541	0.0267973	0.0229343	256297/3975/7020/7021/51761/1826/8842/793	8
GO:0021516	BP	GO:0021516	dorsal spinal cord development	8/2038	22/18493	0.0016541	0.0267973	0.0229343	10660/3975/3218/429/64211/644168/8022/23500	8
GO:0071459	BP	GO:0071459	protein localization to chromosome, centromeric region	8/2038	22/18493	0.0016541	0.0267973	0.0229343	1058/9212/81620/7272/983/701/10403/54908	8
GO:0006633	BP	GO:0006633	fatty acid biosynthetic process	30/2038	156/18493	0.00166316	0.0268671	0.0229941	1544/1576/1543/1558/6785/1571/79152/255189/83401/552/1559/5166/79993/59344/54988/6296/242/5740/5743/253017/2171/33/9536/5354/247/2053/123876/116519/84696/84532	30
GO:0060079	BP	GO:0060079	excitatory postsynaptic potential	22/2038	103/18493	0.00168469	0.02712	0.0232105	2895/2891/22953/124925/2898/1813/4355/22871/7476/2902/55584/8001/2903/56853/5026/134/2904/3060/1144/1134/23316/154	22
GO:0014072	BP	GO:0014072	response to isoquinoline alkaloid	10/2038	32/18493	0.001698	0.02712	0.0232105	84152/2354/6870/2775/1813/1268/2902/5582/5309/6863	10
GO:0043278	BP	GO:0043278	response to morphine	10/2038	32/18493	0.001698	0.02712	0.0232105	84152/2354/6870/2775/1813/1268/2902/5582/5309/6863	10
GO:0045987	BP	GO:0045987	positive regulation of smooth muscle contraction	10/2038	32/18493	0.001698	0.02712	0.0232105	148/8877/6870/147/5743/151/18/255743/10874/60675	10
GO:0015850	BP	GO:0015850	organic hydroxy compound transport	44/2038	255/18493	0.00172558	0.0274828	0.0235211	1113/6530/341359/28234/1394/338821/89872/1812/143425/90019/57586/51083/6387/1813/26154/1268/6623/3931/6857/6770/366/6580/64220/151/80765/10599/8435/1071/201780/18/8647/10998/1588/6554/225689/9429/9123/6863/4602/10227/116519/6696/6342/5972	44
GO:0007565	BP	GO:0007565	female pregnancy	35/2038	191/18493	0.00173778	0.0275995	0.0236209	1393/5858/1515/2099/1394/7356/2354/340784/6866/5744/2353/5617/1268/1828/3675/4318/1364/5740/5743/151/6513/367/2834/6833/3641/54407/1723/4316/2056/780/2192/6696/6013/23641/1833	35
GO:0007409	BP	GO:0007409	axonogenesis	70/2038	449/18493	0.00174288	0.0276029	0.0236238	7345/114798/84189/9723/64843/655/11023/84570/2044/6474/1946/4747/4884/56896/3975/3798/389549/6387/1813/4099/7476/1749/5979/57216/3670/2902/10381/22865/10090/170302/8013/9211/4684/25806/4929/10371/1959/2297/5454/3925/23566/80128/2674/4804/1496/51761/6277/494470/1826/1949/2049/2596/84894/57453/26050/2253/26257/644168/2637/8022/4009/3792/6696/5076/9048/84628/84665/57689/4916/3984	70
GO:0001658	BP	GO:0001658	branching involved in ureteric bud morphogenesis	15/2038	60/18493	0.0017638	0.0278562	0.0238406	10736/3237/2138/3207/3975/2297/79633/3217/255743/2253/5076/6943/2719/4435/170690	15
GO:0006026	BP	GO:0006026	aminoglycan catabolic process	16/2038	66/18493	0.00178186	0.027985	0.0239509	55576/10894/23553/57115/1634/254773/221914/3161/4958/8993/176/60495/4969/2719/10675/2239	16
GO:0007588	BP	GO:0007588	excretion	16/2038	66/18493	0.00178186	0.027985	0.0239509	148/363/4879/7827/50617/1813/552/366/1188/4192/6863/134/136/1910/525/54577	16
GO:0046661	BP	GO:0046661	male sex differentiation	30/2038	157/18493	0.00184397	0.0288317	0.0246755	190/3623/1515/56311/2099/3207/3239/56159/81930/400629/4521/268/6770/10371/367/653/1761/6422/259266/6716/2254/3972/642658/2253/58524/6943/4323/6926/5972/269	30
GO:1903825	BP	GO:1903825	organic acid transmembrane transport	26/2038	130/18493	0.00185106	0.0288317	0.0246755	55117/56301/11254/6512/2348/6535/6510/366/64220/9152/6506/6561/64849/6505/284111/153201/10998/54407/6539/162515/9123/55089/7057/246213/27347/6542	26
GO:1905039	BP	GO:1905039	carboxylic acid transmembrane transport	26/2038	130/18493	0.00185106	0.0288317	0.0246755	55117/56301/11254/6512/2348/6535/6510/366/64220/9152/6506/6561/64849/6505/284111/153201/10998/54407/6539/162515/9123/55089/7057/246213/27347/6542	26
GO:0007187	BP	GO:0007187	G protein-coupled receptor signaling pathway, coupled to cyclic nucleotide second messenger	44/2038	256/18493	0.00186659	0.0289936	0.024814	1113/1129/8685/6753/3358/7433/148/114/1394/4544/2914/1812/5744/3357/799/2641/6755/333/4852/5745/1128/2775/1813/2913/1268/4886/147/768239/2740/9630/151/2781/11251/114131/5138/23566/3640/5737/2692/134/136/2358/6752/154	44
GO:0051216	BP	GO:0051216	cartilage development	37/2038	206/18493	0.00188911	0.0292631	0.0250446	27302/2658/8091/1280/8092/10736/2249/340419/655/579/3207/4322/6474/7477/5307/5744/4153/5745/7476/9350/1746/3221/653/85477/7298/176/3491/2254/3696/1311/642658/1302/8785/112744/651/116039/1116	37
GO:0051963	BP	GO:0051963	regulation of synapse assembly	22/2038	104/18493	0.00191878	0.0296414	0.0253684	114798/84189/2895/1946/22871/7476/2902/22865/57622/2049/2596/26280/54674/26050/375323/2239/387804/23316/84628/654429/4916/78999	22
GO:1901990	BP	GO:1901990	regulation of mitotic cell cycle phase transition	60/2038	375/18493	0.00195014	0.0299014	0.025591	8091/27133/1543/991/5569/11065/9212/9319/5347/81620/7272/90381/113130/995/891/8318/983/701/54443/4998/51512/9787/2810/699/993/1869/4751/990/10403/22974/9401/63967/1063/1062/641/51514/4085/4582/79733/10733/1820/3161/2146/9928/8555/144455/8317/9735/994/9510/219736/6604/5933/54908/6659/1843/22994/23026/9700/79915	60
GO:0048477	BP	GO:0048477	oogenesis	19/2038	85/18493	0.00195147	0.0299014	0.025591	54937/163589/56776/9319/891/147872/402381/268/342977/1761/2069/668/347688/259266/11144/54852/994/339834/51087	19
GO:1901992	BP	GO:1901992	positive regulation of mitotic cell cycle phase transition	19/2038	85/18493	0.00195147	0.0299014	0.025591	1543/11065/81620/113130/995/891/8318/983/9787/993/990/9401/51514/8317/994/9510/219736/6604/9700	19
GO:0015718	BP	GO:0015718	monocarboxylic acid transport	30/2038	158/18493	0.00204147	0.0307803	0.0263432	28234/338821/1813/255189/1579/366/4828/64220/80765/10599/2180/201780/18/8647/84879/26279/10998/6554/6539/9122/162515/9123/7057/9900/8529/6540/8600/6567/8792/11001	30
GO:0099565	BP	GO:0099565	chemical synaptic transmission, postsynaptic	23/2038	111/18493	0.00204187	0.0307803	0.0263432	2895/2891/22953/124925/2898/1813/4355/22871/7476/2902/55584/8001/18/2903/56853/5026/134/2904/3060/1144/1134/23316/154	23
GO:0007416	BP	GO:0007416	synapse assembly	31/2038	165/18493	0.0020651	0.0307803	0.0263432	114798/1007/84189/2823/2895/1946/1812/1813/22871/53942/7476/27445/84694/2902/92737/22865/1826/57622/2049/2596/26280/54674/26050/375323/2239/387804/23316/84628/654429/4916/78999	31
GO:0071772	BP	GO:0071772	response to BMP	31/2038	165/18493	0.0020651	0.0307803	0.0263432	27302/2658/1280/168667/655/1482/55273/22943/199699/1749/1958/3675/9350/268/1745/6692/6664/2297/7021/653/494470/6422/25928/10653/64388/3491/642658/2253/2719/286204/269	31
GO:0071773	BP	GO:0071773	cellular response to BMP stimulus	31/2038	165/18493	0.0020651	0.0307803	0.0263432	27302/2658/1280/168667/655/1482/55273/22943/199699/1749/1958/3675/9350/268/1745/6692/6664/2297/7021/653/494470/6422/25928/10653/64388/3491/642658/2253/2719/286204/269	31
GO:0097479	BP	GO:0097479	synaptic vesicle localization	31/2038	165/18493	0.0020651	0.0307803	0.0263432	1129/341359/148/9515/1812/143425/90019/23025/57586/3798/8618/26059/1813/1268/22871/7476/27445/6857/5030/6616/5582/80128/254263/1759/136/8448/140730/9900/440279/9751/10675	31
GO:0000712	BP	GO:0000712	resolution of meiotic recombination intermediates	7/2038	18/18493	0.00206871	0.0307803	0.0263432	56159/146956/7153/641/158401/164045/254528	7
GO:0007625	BP	GO:0007625	grooming behavior	7/2038	18/18493	0.00206871	0.0307803	0.0263432	1812/1813/552/85445/3218/26050/10874	7
GO:0030540	BP	GO:0030540	female genitalia development	7/2038	18/18493	0.00206871	0.0307803	0.0263432	2099/3975/7301/64220/1588/6716/6926	7
GO:0060749	BP	GO:0060749	mammary gland alveolus development	7/2038	18/18493	0.00206871	0.0307803	0.0263432	2099/8835/367/780/7166/8600/8792	7
GO:0061377	BP	GO:0061377	mammary gland lobule development	7/2038	18/18493	0.00206871	0.0307803	0.0263432	2099/8835/367/780/7166/8600/8792	7
GO:0046660	BP	GO:0046660	female sex differentiation	24/2038	118/18493	0.0021487	0.0318864	0.0272898	174/431707/3623/117154/2099/5798/3975/7301/268/64220/2069/1602/668/6422/1588/6716/7425/11144/9510/4323/6926/2189/269/9468	24
GO:0006939	BP	GO:0006939	smooth muscle contraction	22/2038	105/18493	0.00217993	0.0321809	0.0275419	1129/148/8877/22953/1812/6870/3357/1813/147/5743/151/18/255743/1311/134/136/7137/1910/10874/60675/6752/154	22
GO:0021761	BP	GO:0021761	limbic system development	22/2038	105/18493	0.00217993	0.0321809	0.0275419	190/8941/2044/4747/1812/23440/1813/1746/1745/8013/7804/10371/5454/84879/4192/2146/6716/9928/64211/220/4009/6926	22
GO:0010092	BP	GO:0010092	specification of animal organ identity	10/2038	33/18493	0.00219882	0.0322913	0.0276363	3227/3207/22943/7472/3670/367/2253/6604/5076/55897	10
GO:0019934	BP	GO:0019934	cGMP-mediated signaling	10/2038	33/18493	0.00219882	0.0322913	0.0276363	3358/4544/3357/10900/5138/3747/136/7057/1910/50940	10
GO:0034080	BP	GO:0034080	CENP-A containing nucleosome assembly	12/2038	44/18493	0.00225335	0.032921	0.0281753	1058/79019/387103/55355/2491/11339/64105/64946/79682/79172/91687/8360	12
GO:0061641	BP	GO:0061641	CENP-A containing chromatin organization	12/2038	44/18493	0.00225335	0.032921	0.0281753	1058/79019/387103/55355/2491/11339/64105/64946/79682/79172/91687/8360	12
GO:0031497	BP	GO:0031497	chromatin assembly	31/2038	166/18493	0.00227731	0.0331853	0.0284014	8091/645996/64591/1058/79019/387103/55355/55723/8208/2491/11339/4171/1029/64105/3009/56979/128312/23569/64946/3007/3070/79682/3014/79172/91687/3159/8346/341567/8352/8360/8354	31
GO:0035116	BP	GO:0035116	embryonic hindlimb morphogenesis	9/2038	28/18493	0.0023088	0.0334717	0.0286466	2249/340419/5307/7476/2253/2719/257/6926/116039	9
GO:0048265	BP	GO:0048265	response to pain	9/2038	28/18493	0.0023088	0.0334717	0.0286466	6530/1621/22953/8989/5979/5582/6863/7057/1910	9
GO:0008406	BP	GO:0008406	gonad development	38/2038	216/18493	0.00241865	0.0346225	0.0296315	174/190/431707/3623/1515/56311/2099/3207/64591/5798/56159/81930/400629/4521/268/6770/10371/367/1761/2069/668/6422/259266/1588/6716/2254/7425/11144/3972/642658/2253/9510/6943/4323/2189/5972/269/9468	38
GO:0072347	BP	GO:0072347	response to anesthetic	17/2038	74/18493	0.00242317	0.0346225	0.0296315	1393/84152/2354/1812/6870/3359/2775/1813/890/1268/2902/5582/18/3208/5309/6863/27092	17
GO:0051592	BP	GO:0051592	response to calcium ion	28/2038	146/18493	0.00242767	0.0346225	0.0296315	1393/63928/125981/341359/2354/2696/143425/90019/57586/2353/7139/22871/8437/6857/3710/1894/131034/3208/15/151835/9536/7057/27094/27132/2243/2244/1843/7222	28
GO:0007501	BP	GO:0007501	mesodermal cell fate specification	6/2038	14/18493	0.00243717	0.0346225	0.0296315	10736/2138/3207/22943/5076/55897	6
GO:0021984	BP	GO:0021984	adenohypophysis development	6/2038	14/18493	0.00243717	0.0346225	0.0296315	5308/50506/1813/6657/2692/2253	6
GO:0072498	BP	GO:0072498	embryonic skeletal joint development	6/2038	14/18493	0.00243717	0.0346225	0.0296315	1280/3227/655/3207/6474/116039	6
GO:0097154	BP	GO:0097154	GABAergic neuron differentiation	6/2038	14/18493	0.00243717	0.0346225	0.0296315	1812/1813/1746/1745/170302/429	6
GO:1904889	BP	GO:1904889	regulation of excitatory synapse assembly	6/2038	14/18493	0.00243717	0.0346225	0.0296315	2895/7476/57622/387804/4916/78999	6
GO:0070374	BP	GO:0070374	positive regulation of ERK1 and ERK2 cascade	42/2038	245/18493	0.00245253	0.0347535	0.0297436	168667/8685/3358/148/2249/285220/8074/2044/3357/799/2641/6370/10344/1813/7301/284656/6368/4486/5979/54209/4889/7010/6358/255743/29108/2049/6357/23779/2056/6375/5031/2253/780/2051/2358/8600/2243/2244/8792/3645/4916/1116	42
GO:0043279	BP	GO:0043279	response to alkaloid	22/2038	106/18493	0.00247057	0.0349216	0.0298875	1393/84152/2354/1812/6870/3359/2775/1813/890/5888/1268/6770/2902/641/7054/5582/18/5309/1723/6863/27092/6569	22
GO:0006940	BP	GO:0006940	regulation of smooth muscle contraction	15/2038	62/18493	0.00249882	0.0351451	0.0300787	1129/148/8877/6870/147/5743/151/18/255743/134/136/7137/10874/60675/154	15
GO:0048645	BP	GO:0048645	animal organ formation	15/2038	62/18493	0.00249882	0.0351451	0.0300787	3227/655/579/2138/3207/2348/22943/7472/3670/367/4909/2253/6604/5076/55897	15
GO:0003211	BP	GO:0003211	cardiac ventricle formation	5/2038	10/18493	0.00252961	0.0354899	0.0303739	1482/6664/6604/6659/55897	5
GO:0051930	BP	GO:0051930	regulation of sensory perception of pain	11/2038	39/18493	0.00254111	0.0355629	0.0304363	26952/10879/55273/55/151647/2903/2911/2171/134/1910/10874	11
GO:0001503	BP	GO:0001503	ossification	60/2038	380/18493	0.00266076	0.0371455	0.0317908	2658/1280/10736/4745/202151/340419/655/134701/8074/4322/6474/7477/50506/5744/22943/50617/1591/5617/3381/5745/1749/9350/1893/6664/5251/4318/79412/7020/6657/5743/7010/1959/2662/117581/653/79633/4958/6422/255743/1758/3491/2254/6863/81621/642658/55363/115908/7166/6696/525/2719/8600/4323/4435/6569/847/651/8792/116039/154	60
GO:0030073	BP	GO:0030073	insulin secretion	36/2038	203/18493	0.00269467	0.0375263	0.0321167	1113/169026/2044/4544/139760/9515/1946/2696/143425/5798/2641/6755/51083/1813/222546/1268/27445/3670/2740/3710/6616/6513/114131/7021/18/6422/6833/7425/3747/133308/2752/6514/55107/3767/55638/6659	36
GO:1903532	BP	GO:1903532	positive regulation of secretion by cell	59/2038	373/18493	0.00275672	0.0381948	0.0326888	169026/4321/3623/9173/341359/8941/2696/143425/6288/55655/23025/3357/2641/51083/23086/8913/116337/6387/1813/222546/1268/22871/552/2922/114899/6664/3670/6857/8911/4828/85480/64109/57126/114131/8564/18/668/29108/1588/27063/2692/6863/3552/136/4602/2752/55107/247/10626/6696/10874/1361/112744/8600/55638/2243/2244/286676/6659	59
GO:0014075	BP	GO:0014075	response to amine	12/2038	45/18493	0.00276969	0.0381948	0.0326888	84152/1621/1812/3746/1813/983/2902/11093/4929/7054/2903/3747	12
GO:0030261	BP	GO:0030261	chromosome condensation	12/2038	45/18493	0.00276969	0.0381948	0.0326888	8091/113130/891/64151/983/23397/7153/3009/51203/3007/341567/9918	12
GO:0048483	BP	GO:0048483	autonomic nervous system development	12/2038	45/18493	0.00276969	0.0381948	0.0326888	3642/5979/6664/7020/10371/1959/7021/429/3196/2637/1910/6659	12
GO:0045471	BP	GO:0045471	response to ethanol	25/2038	127/18493	0.00280324	0.0383083	0.032786	1393/51208/57817/1621/3359/1440/1571/2539/5617/1813/983/1268/54658/6770/2902/130/7054/18/2903/7298/3747/2904/1728/847/4916	25
GO:0051952	BP	GO:0051952	regulation of amine transport	20/2038	94/18493	0.00280379	0.0383083	0.032786	1113/341359/1812/143425/90019/57586/6387/1813/1268/552/6623/6857/4889/151/8564/18/134/9900/59272/27347	20
GO:0003230	BP	GO:0003230	cardiac atrium development	10/2038	34/18493	0.0028118	0.0383083	0.032786	27302/57057/6474/1482/7472/199699/3670/3491/6659/55897	10
GO:0014047	BP	GO:0014047	glutamate secretion	10/2038	34/18493	0.0028118	0.0383083	0.032786	6512/552/6857/4889/6506/8564/6505/27165/54407/134	10
GO:0071392	BP	GO:0071392	cellular response to estradiol stimulus	10/2038	34/18493	0.0028118	0.0383083	0.032786	1393/6753/2099/4654/81930/890/54658/6422/6752/3015	10
GO:0044839	BP	GO:0044839	cell cycle G2/M phase transition	38/2038	218/18493	0.00285263	0.038771	0.033182	8091/27133/5569/9212/5347/9133/90381/995/891/9088/983/890/2305/9833/4998/51512/993/4751/22822/990/22974/9401/63967/1063/641/51514/10733/3161/79831/9928/1111/8555/8317/994/219736/6604/22994/79915	38
GO:0042743	BP	GO:0042743	hydrogen peroxide metabolic process	14/2038	57/18493	0.00295698	0.0399479	0.0341892	3046/1544/1543/50506/405753/3043/3045/3240/3042/3049/3040/4025/53905/847	14
GO:0015669	BP	GO:0015669	gas transport	7/2038	19/18493	0.00296683	0.0399479	0.0341892	3046/3043/3045/3042/3049/3040/58157	7
GO:0060004	BP	GO:0060004	reflex	7/2038	19/18493	0.00296683	0.0399479	0.0341892	84189/148/8013/429/255743/117532/220	7
GO:0001892	BP	GO:0001892	embryonic placenta development	19/2038	88/18493	0.00296748	0.0399479	0.0341892	84870/655/1045/7477/58495/3880/7472/6692/7274/79733/10733/113026/653/9021/10653/3491/4188/144455/4435	19
GO:0034767	BP	GO:0034767	positive regulation of ion transmembrane transport	28/2038	148/18493	0.00297752	0.0399592	0.0341989	1812/3757/3359/10345/799/51083/3746/2539/65268/219527/389816/342667/88/6833/440699/23630/6375/5031/3747/27092/3767/30845/6271/1756/27347/387129/6569/154	28
GO:0042593	BP	GO:0042593	glucose homeostasis	40/2038	233/18493	0.00298245	0.0399592	0.0341989	2044/4544/9515/1946/1621/79727/5798/2641/6755/222546/1268/5166/5105/147/64478/6770/4828/2308/7021/7054/4804/6833/2538/2171/2692/7425/100132074/5296/133308/55107/3953/3767/123876/10804/1361/648791/5076/55638/6659/3645	40
GO:2001257	BP	GO:2001257	regulation of cation channel activity	30/2038	162/18493	0.00302373	0.0401462	0.0343589	1393/1394/4544/10345/51083/3746/219527/389816/1813/342667/22871/88/4318/3755/3208/254263/6833/440699/23630/2056/2859/5031/3747/27092/126306/3767/30845/6271/1756/154	30
GO:0000083	BP	GO:0000083	regulation of transcription involved in G1/S transition of mitotic cell cycle	9/2038	29/18493	0.00302481	0.0401462	0.0343589	898/81620/8318/4998/1869/990/6241/7298/144455	9
GO:0019098	BP	GO:0019098	reproductive behavior	9/2038	29/18493	0.00302481	0.0401462	0.0343589	4808/84152/1621/1812/552/2902/7054/5270/4861	9
GO:1905606	BP	GO:1905606	regulation of presynapse assembly	9/2038	29/18493	0.00302481	0.0401462	0.0343589	114798/22871/7476/22865/26280/2239/84628/4916/78999	9
GO:0090103	BP	GO:0090103	cochlea morphogenesis	8/2038	24/18493	0.00311226	0.0411139	0.0351871	2138/57216/5456/53904/2535/5754/115908/5076	8
GO:1901018	BP	GO:1901018	positive regulation of potassium ion transmembrane transporter activity	8/2038	24/18493	0.00311226	0.0411139	0.0351871	51083/3746/219527/389816/88/6833/440699/3747	8
GO:0006690	BP	GO:0006690	icosanoid metabolic process	22/2038	108/18493	0.00315078	0.041475	0.0354962	1544/1557/1543/1558/1571/255189/552/1559/59344/1579/1555/242/5740/5743/2171/9536/247/124975/2053/8529/5446/4363	22
GO:0051931	BP	GO:0051931	regulation of sensory perception	11/2038	40/18493	0.00316161	0.041475	0.0354962	26952/10879/55273/55/151647/2903/2911/2171/134/1910/10874	11
GO:1901381	BP	GO:1901381	positive regulation of potassium ion transmembrane transport	11/2038	40/18493	0.00316161	0.041475	0.0354962	3757/51083/3746/65268/219527/389816/88/6833/440699/23630/3747	11
GO:0033500	BP	GO:0033500	carbohydrate homeostasis	40/2038	234/18493	0.00322392	0.0421946	0.036112	2044/4544/9515/1946/1621/79727/5798/2641/6755/222546/1268/5166/5105/147/64478/6770/4828/2308/7021/7054/4804/6833/2538/2171/2692/7425/100132074/5296/133308/55107/3953/3767/123876/10804/1361/648791/5076/55638/6659/3645	40
GO:0007605	BP	GO:0007605	sensory perception of sound	27/2038	142/18493	0.00325208	0.0424648	0.0363433	1280/124590/84189/5077/2138/332/22953/50617/53942/2070/55584/5456/7020/53904/7054/79955/4693/4640/117532/65217/113278/10804/1302/525/246213/51473/84530	27
GO:1902749	BP	GO:1902749	regulation of cell cycle G2/M phase transition	31/2038	170/18493	0.00332359	0.0432986	0.0370569	8091/27133/5569/9212/5347/90381/995/891/983/4998/51512/993/4751/990/22974/9401/63967/1063/641/51514/10733/3161/9928/1111/8555/8317/994/219736/6604/22994/79915	31
GO:0007140	BP	GO:0007140	male meiotic nuclear division	12/2038	46/18493	0.00337804	0.0437058	0.0374054	676/56154/9319/56159/81930/400629/84944/54514/56603/11144/254528/91646	12
GO:0045214	BP	GO:0045214	sarcomere organization	12/2038	46/18493	0.00337804	0.0437058	0.0374054	27302/7138/1482/3880/7139/88/80206/4621/27063/4606/84665/84033	12
GO:0048806	BP	GO:0048806	genitalia development	12/2038	46/18493	0.00337804	0.0437058	0.0374054	2099/3239/3975/7301/64220/367/653/1588/6716/2253/2295/6926	12
GO:0033273	BP	GO:0033273	response to vitamin	19/2038	89/18493	0.00339148	0.0437795	0.0374685	1592/655/8074/1543/57817/2348/1591/9227/5251/5743/56603/429/6422/7298/2056/6696/5009/6569/847	19
GO:0006631	BP	GO:0006631	fatty acid metabolic process	58/2038	369/18493	0.00342842	0.0441555	0.0377903	1544/1557/1576/1543/1558/6785/1571/79152/255189/7306/83401/1268/552/1559/5166/79993/59344/5105/1579/54988/2690/1555/6296/23305/8013/242/5740/5743/84129/7054/2180/253017/2110/10998/36/1962/2171/33/9536/5354/2954/51703/54363/247/2053/123876/8529/116519/84696/6342/84532/27329/10449/285440/5446/11001/23600/34	58
GO:0090092	BP	GO:0090092	regulation of transmembrane receptor protein serine/threonine kinase signaling pathway	40/2038	235/18493	0.00348198	0.0447435	0.0382935	27302/2658/168667/3623/655/57057/2348/3547/58495/22943/7272/199699/3675/9350/1745/6664/10637/1149/64081/2662/2297/7021/653/1761/494470/6422/255743/25928/64388/3491/2254/7057/23089/3626/135228/2719/112744/4435/286204/651	40
GO:0006520	BP	GO:0006520	cellular amino acid metabolic process	52/2038	324/18493	0.00350657	0.0448553	0.0383892	11254/1159/54511/2572/259307/1491/51166/112399/6535/84842/339983/2690/2571/92292/10249/440/548596/5831/4143/4522/8564/7054/23569/4329/284716/18/64902/339896/3242/131669/27165/6898/80150/36/112817/635/389434/4942/2752/10157/2954/443/7166/1728/1807/6999/5009/23057/6542/137872/5053/594	52
GO:0070372	BP	GO:0070372	regulation of ERK1 and ERK2 cascade	52/2038	324/18493	0.00350657	0.0448553	0.0383892	168667/8685/3358/148/2249/285220/8074/2044/338761/3357/799/2641/6370/10344/65268/1813/7301/284656/6368/4486/5979/55584/54209/4889/7010/6358/255743/29108/2049/6357/3491/23779/2056/6375/5031/2253/780/1846/2192/171389/467/2051/2358/8600/2243/2244/8792/3645/1843/4916/1116/7078	52
GO:0097164	BP	GO:0097164	ammonium ion metabolic process	35/2038	199/18493	0.00351448	0.0448553	0.0383892	125981/8877/130367/1621/1812/6870/1813/255189/27293/29958/3931/340562/283748/4929/6620/7054/1071/18/2903/84879/26279/2171/33/79887/635/133121/79153/7166/204962/116519/79888/60482/123745/9468/34	35
GO:0045777	BP	GO:0045777	positive regulation of blood pressure	10/2038	35/18493	0.00355387	0.0451541	0.0386449	1585/148/6870/1268/552/147/2740/151/134/10874	10
GO:0071542	BP	GO:0071542	dopaminergic neuron differentiation	10/2038	35/18493	0.00355387	0.0451541	0.0386449	340419/22943/7472/2019/4929/5309/6422/4010/2253/4009	10
GO:0032414	BP	GO:0032414	positive regulation of ion transmembrane transporter activity	20/2038	96/18493	0.00362289	0.0459279	0.0393071	3359/10345/51083/3746/65268/219527/389816/342667/88/6833/440699/5031/3747/27092/3767/30845/6271/1756/27347/154	20
GO:0001659	BP	GO:0001659	temperature homeostasis	31/2038	171/18493	0.00364132	0.0460084	0.0393761	3226/1621/6588/1812/1813/83401/1268/7350/283455/1149/5743/2308/2180/18/4237/2171/33/3552/134/51316/3953/3060/3565/1910/10874/10912/8600/8792/51087/154/79054	31
GO:0010752	BP	GO:0010752	regulation of cGMP-mediated signaling	6/2038	15/18493	0.00368621	0.0460084	0.0393761	4544/10900/5138/136/7057/50940	6
GO:0060134	BP	GO:0060134	prepulse inhibition	6/2038	15/18493	0.00368621	0.0460084	0.0393761	2895/1812/1813/2902/1496/2173	6
GO:0060579	BP	GO:0060579	ventral spinal cord interneuron fate commitment	6/2038	15/18493	0.00368621	0.0460084	0.0393761	4821/6656/429/2128/58524/8022	6
GO:0060581	BP	GO:0060581	cell fate commitment involved in pattern specification	6/2038	15/18493	0.00368621	0.0460084	0.0393761	4821/6656/429/2128/58524/8022	6
GO:0098719	BP	GO:0098719	sodium ion import across plasma membrane	6/2038	15/18493	0.00368621	0.0460084	0.0393761	10021/6549/285335/6569/284525/389015	6
GO:1903818	BP	GO:1903818	positive regulation of voltage-gated potassium channel activity	6/2038	15/18493	0.00368621	0.0460084	0.0393761	3746/219527/389816/6833/440699/3747	6
GO:0000724	BP	GO:0000724	double-strand break repair via homologous recombination	24/2038	123/18493	0.00378718	0.0471645	0.0403655	56154/8438/147872/8318/5888/10721/9401/2187/7516/116028/55010/641/51659/79000/10635/84296/11144/3014/1111/8317/254528/548593/2237/84515	24
GO:0030198	BP	GO:0030198	extracellular matrix organization	55/2038	348/18493	0.0038181	0.0474451	0.0406056	5644/1280/4321/4319/3817/1515/84570/4322/80070/255631/1298/4312/3381/1634/3675/1404/6692/169044/4318/7148/340267/5340/3691/3694/1805/4237/4320/255743/10653/176/4316/1842/1758/3491/3696/1288/1311/81621/3680/642658/7057/2295/60495/780/10609/2192/1302/8785/6696/284217/1361/4239/4323/2243/2244	55
GO:0003073	BP	GO:0003073	regulation of systemic arterial blood pressure	19/2038	90/18493	0.00386466	0.0479185	0.0410108	1585/354/148/3817/22953/1813/552/3816/147/1579/367/134/7137/2028/8529/59272/5972/154/170690	19
GO:0001709	BP	GO:0001709	cell fate determination	11/2038	41/18493	0.00389806	0.0479966	0.0410777	4821/10660/4654/7476/3670/56603/429/57453/4909/5076/55897	11
GO:0072210	BP	GO:0072210	metanephric nephron development	11/2038	41/18493	0.00389806	0.0479966	0.0410777	10736/7827/3975/1958/5979/2297/7021/153572/5076/6943/4435	11
GO:0003209	BP	GO:0003209	cardiac atrium morphogenesis	9/2038	30/18493	0.00390493	0.0479966	0.0410777	27302/57057/6474/1482/7472/3670/3491/6659/55897	9
GO:0099174	BP	GO:0099174	regulation of presynapse organization	9/2038	30/18493	0.00390493	0.0479966	0.0410777	114798/22871/7476/22865/26280/2239/84628/4916/78999	9
GO:0043062	BP	GO:0043062	extracellular structure organization	62/2038	402/18493	0.00395285	0.0484803	0.0414916	5644/1280/4321/655/4319/3817/1515/84570/4322/80070/255631/1298/4312/3381/1634/3675/1404/6692/3931/169044/4018/4318/7148/340267/5340/3691/3694/1805/8435/1071/4237/4320/255743/10653/176/4316/1842/1758/3491/3696/1288/1311/81621/3680/642658/7057/2295/60495/780/10609/2192/1302/116519/8785/6696/284217/1361/4239/213/4323/2243/2244	62
GO:0050796	BP	GO:0050796	regulation of insulin secretion	31/2038	172/18493	0.00398445	0.0487621	0.0417328	1113/169026/2044/4544/9515/1946/2696/143425/2641/6755/1813/222546/1268/3670/2740/3710/6616/6513/114131/7021/18/6422/6833/3747/133308/2752/6514/55107/3767/55638/6659	31
GO:0014074	BP	GO:0014074	response to purine-containing compound	28/2038	151/18493	0.00399866	0.0488303	0.0417912	1393/2354/10021/22953/50506/5798/2353/5105/6770/5030/366/5743/7010/5138/15/5026/1723/7425/10518/5031/3767/53905/4435/6528/5972/2819/1843/7222	28
GO:0060675	BP	GO:0060675	ureteric bud morphogenesis	15/2038	65/18493	0.00406138	0.0494893	0.0423552	10736/3237/2138/3207/3975/2297/79633/3217/255743/2253/5076/6943/2719/4435/170690	15
GO:2000027	BP	GO:2000027	regulation of animal organ morphogenesis	36/2038	208/18493	0.00407733	0.0495769	0.0424301	27302/10736/3227/84870/340419/655/2138/2099/3207/89958/22943/3239/3975/7472/7476/57216/3670/401138/7020/367/3217/6422/2535/1758/5754/4300/2253/115908/58524/219736/1361/5076/2719/2239/4435/55897	36
GO:0006636	BP	GO:0006636	unsaturated fatty acid biosynthetic process	12/2038	47/18493	0.00408976	0.0496014	0.0424511	6785/255189/83401/552/79993/59344/242/5740/5743/2171/9536/247	12
GO:0007617	BP	GO:0007617	mating behavior	7/2038	20/18493	0.00413514	0.0496014	0.0424511	4808/84152/1812/552/2902/7054/5270	7
GO:0042403	BP	GO:0042403	thyroid hormone metabolic process	7/2038	20/18493	0.00413514	0.0496014	0.0424511	50506/405753/7038/27284/389434/53905/6528	7
GO:0061436	BP	GO:0061436	establishment of skin barrier	7/2038	20/18493	0.00413514	0.0496014	0.0424511	26154/2810/59344/1364/242/3925/56603	7
GO:0021544	BP	GO:0021544	subpallium development	8/2038	25/18493	0.00414076	0.0496014	0.0424511	1812/1813/1746/1745/429/26050/2253/220	8
GO:0042745	BP	GO:0042745	circadian sleep/wake cycle	8/2038	25/18493	0.00414076	0.0496014	0.0424511	4544/1813/22871/6770/7054/2692/134/10874	8
GO:0045956	BP	GO:0045956	positive regulation of calcium ion-dependent exocytosis	8/2038	25/18493	0.00414076	0.0496014	0.0424511	341359/8941/143425/8913/1268/22871/6857/8911	8
GO:0050879	BP	GO:0050879	multicellular organismal movement	13/2038	53/18493	0.00416226	0.0496486	0.0424915	7138/7139/7136/4626/51761/4621/429/124093/7137/1144/126306/1134/1756	13
GO:0050881	BP	GO:0050881	musculoskeletal movement	13/2038	53/18493	0.00416226	0.0496486	0.0424915	7138/7139/7136/4626/51761/4621/429/124093/7137/1144/126306/1134/1756	13
GO:0000725	BP	GO:0000725	recombinational repair	24/2038	124/18493	0.00421697	0.0497992	0.0426204	56154/8438/147872/8318/5888/10721/9401/2187/7516/116028/55010/641/51659/79000/10635/84296/11144/3014/1111/8317/254528/548593/2237/84515	24
GO:0006268	BP	GO:0006268	DNA unwinding involved in DNA replication	5/2038	11/18493	0.00421892	0.0497992	0.0426204	5888/4171/4176/3159/4175	5
GO:0042178	BP	GO:0042178	xenobiotic catabolic process	5/2038	11/18493	0.00421892	0.0497992	0.0426204	1543/2944/54658/2180/5446	5
GO:0052697	BP	GO:0052697	xenobiotic glucuronidation	5/2038	11/18493	0.00421892	0.0497992	0.0426204	54575/54657/54658/54659/54577	5
GO:0061469	BP	GO:0061469	regulation of type B pancreatic cell proliferation	5/2038	11/18493	0.00421892	0.0497992	0.0426204	5798/3164/8013/6422/5967	5
GO:0097060	CC	GO:0097060	synaptic membrane	92/2170	431/19659	3.02587e-10	1.83671e-07	1.53842e-07	1008/1129/114798/6530/1007/148/2555/2823/2895/2891/114/1821/2914/23109/1812/2556/8745/3359/23025/2569/2572/386617/2898/2566/3746/2568/794/26059/2915/1128/1813/2913/22849/1268/4355/22871/53942/88/3675/1272/22986/6857/3752/2902/5030/9228/55584/6616/22865/85445/9152/8001/1627/55879/6506/5138/5582/1496/2903/400745/9454/254263/1949/57622/2911/2171/10243/9123/1741/3747/134/1759/2904/1144/27092/140730/8…	92
GO:0099240	CC	GO:0099240	intrinsic component of synaptic membrane	46/2170	166/19659	2.20461e-09	6.69098e-07	5.60434e-07	1008/1129/114798/1007/148/2823/2895/114/1812/2556/8745/3359/3746/1128/1813/2913/1268/22871/53942/1272/22986/3752/2902/5030/55584/22865/85445/9152/6506/2903/254263/1949/57622/9123/134/1144/27092/3751/1134/10675/2239/84628/57689/4916/78999/64101	46
GO:0099699	CC	GO:0099699	integral component of synaptic membrane	42/2170	154/19659	1.80344e-08	3.64896e-06	3.05636e-06	1008/1129/114798/1007/148/2823/2895/114/1812/2556/8745/3359/3746/1128/1813/2913/1268/22871/22986/3752/2902/5030/55584/22865/85445/9152/6506/2903/254263/1949/57622/9123/134/1144/27092/3751/1134/10675/57689/4916/78999/64101	42
GO:0098936	CC	GO:0098936	intrinsic component of postsynaptic membrane	35/2170	122/19659	6.90535e-08	7.56292e-06	6.33467e-06	1008/1129/114798/1007/148/2895/1812/2556/3359/3746/1128/1813/2913/22871/1272/22986/3752/2902/55584/22865/2903/254263/1949/57622/9123/134/1144/27092/3751/1134/10675/57689/4916/78999/64101	35
GO:0000779	CC	GO:0000779	condensed chromosome, centromeric region	34/2170	117/19659	7.48644e-08	7.56292e-06	6.33467e-06	332/11004/1058/9212/79019/5347/81620/220134/83540/387103/55355/891/64151/221150/57405/701/699/4751/10403/54821/147841/1063/11130/1062/4085/64105/64946/1780/79682/9735/10615/79172/9918/54908	34
GO:0099055	CC	GO:0099055	integral component of postsynaptic membrane	34/2170	117/19659	7.48644e-08	7.56292e-06	6.33467e-06	1008/1129/114798/1007/148/2895/1812/2556/3359/3746/1128/1813/2913/22871/22986/3752/2902/55584/22865/2903/254263/1949/57622/9123/134/1144/27092/3751/1134/10675/57689/4916/78999/64101	34
GO:0000793	CC	GO:0000793	condensed chromosome	52/2170	221/19659	8.72165e-08	7.56292e-06	6.33467e-06	1045/332/11004/1058/9212/79019/5347/81620/220134/27127/83540/56159/113130/387103/55355/891/147872/64151/221150/57405/5888/701/23397/699/4751/7153/10403/54821/4288/171482/147841/2177/1063/11130/1062/641/4085/64105/64946/1780/158401/79682/11144/3014/1111/9735/10615/79172/339834/10609/9918/54908	52
GO:0000777	CC	GO:0000777	condensed chromosome kinetochore	31/2170	104/19659	1.47534e-07	1.11942e-05	9.37619e-06	332/11004/1058/79019/5347/81620/220134/83540/387103/55355/891/221150/57405/701/699/4751/10403/54821/147841/1063/11130/1062/4085/64105/64946/1780/79682/9735/10615/79172/54908	31
GO:0042734	CC	GO:0042734	presynaptic membrane	41/2170	161/19659	2.08766e-07	1.40801e-05	1.17934e-05	1008/1129/6530/1007/148/2823/114/2914/1812/8745/3359/23025/2572/386617/2898/3746/26059/1128/1813/2913/1268/53942/1272/6857/5030/6616/85445/9152/6506/5138/1496/2903/1949/3747/134/1759/140730/440279/9751/2239/84628	41
GO:0099634	CC	GO:0099634	postsynaptic specialization membrane	30/2170	102/19659	3.2199e-07	1.95448e-05	1.63706e-05	1008/114798/2895/2556/2915/1128/22871/88/22986/3752/2902/55584/22865/2903/254263/1949/57622/2911/10243/9123/1741/2904/1144/27092/3751/3838/1134/57689/78999/64101	30
GO:0000940	CC	GO:0000940	condensed chromosome outer kinetochore	9/2170	12/19659	3.85877e-07	2.12934e-05	1.78353e-05	5347/220134/891/221150/701/699/10403/1063/54908	9
GO:0000776	CC	GO:0000776	kinetochore	35/2170	133/19659	6.86148e-07	3.47077e-05	2.9071e-05	332/11004/1058/9212/79019/5347/81620/220134/7272/83540/81930/387103/55355/891/221150/57405/701/699/4751/10403/54821/147841/2491/1063/11130/1062/4085/64105/64946/1780/79682/9735/10615/79172/54908	35
GO:0000775	CC	GO:0000775	chromosome, centromeric region	45/2170	194/19659	9.6008e-07	4.28231e-05	3.58685e-05	332/11004/1058/9212/79019/5347/81620/220134/7272/27127/83540/113130/81930/387103/55355/891/64151/221150/57405/701/55143/699/4751/10403/54821/147841/2491/1063/11339/11130/1062/4085/64105/64946/1780/157570/3070/79682/9735/10615/79172/91687/9918/54908/79075	45
GO:0045211	CC	GO:0045211	postsynaptic membrane	65/2170	322/19659	9.87683e-07	4.28231e-05	3.58685e-05	1008/1129/114798/1007/148/2555/2895/2891/1821/1812/2556/3359/2569/386617/2898/2566/3746/2568/2915/1128/1813/2913/22849/22871/88/1272/22986/3752/2902/9228/55584/22865/8001/1627/55879/1496/2903/400745/9454/254263/1949/57622/2911/2171/10243/9123/1741/3747/134/1759/2904/1144/27092/8777/375323/3751/64506/3838/1134/1756/10675/57689/4916/78999/64101	65
GO:1902495	CC	GO:1902495	transmembrane transporter complex	65/2170	325/19659	1.38236e-06	5.59394e-05	4.68547e-05	2555/2895/27012/2891/3776/170850/10021/118427/57348/3757/2556/3359/2569/2898/2566/3746/8913/2568/219527/389816/3754/22871/9022/3780/57628/3752/2902/57113/8911/55584/1188/6616/1364/8001/55879/6323/480/59285/54714/10060/486/3755/2903/3773/254263/6833/440699/23630/1741/3747/6332/2904/55107/1144/27092/3767/27094/478/117144/3751/1134/3785/3786/7439/7222	65
GO:0034702	CC	GO:0034702	ion channel complex	61/2170	301/19659	1.8382e-06	6.97368e-05	5.84113e-05	2555/2895/27012/2891/3776/170850/10021/118427/57348/3757/2556/3359/2569/2898/2566/3746/8913/2568/219527/389816/3754/22871/9022/3780/57628/3752/2902/57113/8911/55584/1188/6616/1364/8001/55879/6323/59285/10060/3755/2903/3773/254263/6833/440699/23630/1741/3747/6332/2904/55107/1144/27092/3767/27094/117144/3751/1134/3785/3786/7439/7222	61
GO:0098793	CC	GO:0098793	presynapse	87/2170	482/19659	2.44308e-06	8.72324e-05	7.30656e-05	1008/1393/1129/6530/4922/1007/8497/6457/341359/148/2555/2823/3776/114/6512/4908/2914/24141/4747/1812/143425/90019/8745/3359/5798/23025/57586/2572/386617/2898/3746/8618/794/26059/1128/1813/9143/2913/1268/22871/53942/7476/27445/29993/1272/6857/2571/2902/5030/6616/85445/9152/6506/6620/114131/5138/7054/5582/1496/2903/81615/8492/6833/1949/10590/3747/4909/134/1759/133308/2752/8448/3060/140730/10882/990…	87
GO:0099060	CC	GO:0099060	integral component of postsynaptic specialization membrane	23/2170	74/19659	2.62074e-06	8.83771e-05	7.40244e-05	1008/114798/2895/2556/1128/22871/22986/3752/2902/55584/22865/2903/254263/1949/57622/9123/1144/27092/3751/1134/57689/78999/64101	23
GO:1990351	CC	GO:1990351	transporter complex	65/2170	333/19659	3.27768e-06	0.000104713	8.77075e-05	2555/2895/27012/2891/3776/170850/10021/118427/57348/3757/2556/3359/2569/2898/2566/3746/8913/2568/219527/389816/3754/22871/9022/3780/57628/3752/2902/57113/8911/55584/1188/6616/1364/8001/55879/6323/480/59285/54714/10060/486/3755/2903/3773/254263/6833/440699/23630/1741/3747/6332/2904/55107/1144/27092/3767/27094/478/117144/3751/1134/3785/3786/7439/7222	65
GO:0031012	CC	GO:0031012	extracellular matrix	87/2170	490/19659	4.82188e-06	0.000146344	0.000122577	5644/1280/1755/4321/80760/655/4319/147372/84570/4322/131873/80070/1946/255631/1298/5315/5199/333/3483/4312/4153/3381/1634/7472/27283/7476/7783/140453/22917/1893/1404/169044/401138/80144/4318/7148/340267/11093/5340/4684/221914/2662/8404/1805/4693/22915/4958/4237/4320/6277/6422/255743/3263/176/4316/1842/5266/1758/3491/2254/84894/1288/1311/81621/1/5270/392617/7057/115908/60495/1370/9510/4969/2192/13…	87
GO:0098948	CC	GO:0098948	intrinsic component of postsynaptic specialization membrane	23/2170	77/19659	5.56644e-06	0.000160897	0.000134767	1008/114798/2895/2556/1128/22871/22986/3752/2902/55584/22865/2903/254263/1949/57622/9123/1144/27092/3751/1134/57689/78999/64101	23
GO:0098889	CC	GO:0098889	intrinsic component of presynaptic membrane	24/2170	84/19659	8.2267e-06	0.000226982	0.000190119	1008/1129/1007/148/2823/114/1812/8745/3359/3746/1128/1813/2913/1268/53942/1272/5030/85445/9152/6506/1949/134/2239/84628	24
GO:0098982	CC	GO:0098982	GABA-ergic synapse	22/2170	75/19659	1.22029e-05	0.000322052	0.000269749	1008/114798/148/1946/1812/2556/2569/2566/26059/1813/1268/53942/3752/22865/85445/176/2596/9900/3751/793/10675/78999	22
GO:0016323	CC	GO:0016323	basolateral plasma membrane	45/2170	213/19659	1.32603e-05	0.000335374	0.000280908	768/1015/7809/28234/2348/83959/9376/6521/5745/146894/3675/149461/340547/57216/5030/143162/366/6580/1364/7010/6513/57127/10599/1496/3773/1014/10998/6554/57282/4640/83481/1741/5031/3747/134/133308/3680/3953/4025/4072/525/7439/27347/389015/4363	45
GO:0034705	CC	GO:0034705	potassium channel complex	26/2170	99/19659	1.85737e-05	0.000450969	0.00037773	27012/3776/170850/10021/3757/2898/3746/219527/389816/3754/3780/57628/3752/6616/10060/3755/3773/6833/440699/23630/3747/3767/27094/3751/3785/3786	26
GO:0016324	CC	GO:0016324	apical plasma membrane	58/2170	308/19659	3.24069e-05	0.000756577	0.000633706	1087/3776/363/10004/7380/2348/22953/50506/89958/8170/50617/115019/6557/142680/5745/146894/140453/1828/56302/10568/1579/57216/245972/5030/1364/22802/7010/6513/4582/762/5593/6505/259266/8842/4640/9429/113278/5031/3747/133308/6514/55107/8777/23255/2028/4072/10804/8529/525/11045/140803/53905/286204/222962/27347/6569/154/389015	58
GO:0000778	CC	GO:0000778	condensed nuclear chromosome kinetochore	8/2170	14/19659	3.53612e-05	0.000794973	0.000665866	1058/5347/83540/891/701/699/10403/79172	8
GO:0005871	CC	GO:0005871	kinesin complex	17/2170	54/19659	4.31068e-05	0.000912844	0.000764595	147700/11004/146909/24137/3798/9493/81930/3833/56992/10112/3832/1062/9928/285643/347240/124602/3797	17
GO:0031838	CC	GO:0031838	haptoglobin-hemoglobin complex	7/2170	11/19659	4.3612e-05	0.000912844	0.000764595	3046/3043/3045/3240/3042/3049/3040	7
GO:0005819	CC	GO:0005819	spindle	61/2170	333/19659	4.79345e-05	0.000969876	0.000812364	56776/991/332/9212/5347/79801/146909/220134/1068/7272/24137/284403/9493/81930/891/3833/147872/221150/983/701/55143/56992/827/9787/4751/10112/990/6623/22974/1063/10460/150468/9055/3832/1062/1894/4085/79000/51203/347688/259266/1780/225689/9928/29127/8555/253012/8317/9735/10615/994/822/29899/23255/84722/151393/6569/54908/51473/644943/9700	61
GO:0034703	CC	GO:0034703	cation channel complex	44/2170	219/19659	5.90497e-05	0.00115623	0.000968456	27012/2891/3776/170850/10021/118427/3757/3359/2898/3746/8913/219527/389816/3754/22871/3780/57628/3752/2902/57113/8911/6616/6323/59285/10060/3755/2903/3773/254263/6833/440699/23630/1741/3747/6332/2904/27092/3767/27094/117144/3751/3785/3786/7222	44
GO:0000794	CC	GO:0000794	condensed nuclear chromosome	25/2170	100/19659	6.49295e-05	0.00123163	0.00103161	1045/1058/9212/5347/27127/83540/56159/891/147872/5888/701/23397/699/4751/10403/171482/641/158401/11144/3014/1111/79172/339834/10609/9918	25
GO:0072686	CC	GO:0072686	mitotic spindle	25/2170	101/19659	7.73578e-05	0.00138627	0.00116114	9212/146909/9493/81930/3833/983/22974/10460/150468/3832/1062/1894/4085/51203/259266/29127/8555/8317/10615/822/29899/151393/6569/51473/9700	25
GO:0031225	CC	GO:0031225	anchored component of membrane	36/2170	169/19659	7.76495e-05	0.00138627	0.00116114	1087/248/10942/137797/130576/1946/2348/54742/2572/53942/27293/1272/116372/154064/130574/80329/250/161357/4684/57126/221914/57127/83639/762/2674/646627/80328/100133941/11181/133121/2619/135228/2719/4062/2239/84628	36
GO:0098839	CC	GO:0098839	postsynaptic density membrane	20/2170	75/19659	0.000131559	0.00221823	0.00185798	114798/2895/2915/1128/88/22986/2902/22865/2903/254263/1949/57622/2911/9123/1741/2904/27092/57689/78999/64101	20
GO:0099056	CC	GO:0099056	integral component of presynaptic membrane	20/2170	75/19659	0.000131559	0.00221823	0.00185798	1008/1129/1007/148/2823/114/1812/8745/3359/3746/1128/1813/2913/1268/5030/85445/9152/6506/1949/134	20
GO:0098687	CC	GO:0098687	chromosomal region	61/2170	346/19659	0.000147128	0.00241369	0.0020217	332/11004/1058/9212/79019/55655/5347/81620/220134/7272/27127/83540/113130/81930/387103/55355/891/147872/64151/221150/983/57405/5888/701/55143/80119/4998/699/4751/10403/54821/9401/147841/2491/1063/11339/4171/11130/1062/641/4085/64105/64946/1780/4176/157570/3070/79682/11144/3014/1111/9735/10615/79172/91687/8360/2237/4175/9918/54908/79075	61
GO:0005876	CC	GO:0005876	spindle microtubule	16/2170	54/19659	0.000160701	0.00256698	0.00215009	332/9212/5347/146909/220134/24137/81930/221150/983/827/9055/3832/1062/51203/9735/84722	16
GO:0098978	CC	GO:0098978	glutamatergic synapse	61/2170	350/19659	0.000203424	0.00316611	0.00265192	1008/1129/114798/6457/148/2823/2895/114/4885/84152/1821/4884/1812/8745/3359/23025/2569/2898/26059/1128/1813/2913/1268/22871/88/7476/22986/345651/6857/2902/5030/79012/6616/1627/9211/6506/8404/2903/50632/3208/254263/1949/176/2911/26280/1741/1759/136/27092/9900/3751/3838/793/10675/2239/10397/84628/57689/4916/78999/64101	61
GO:0045177	CC	GO:0045177	apical part of cell	64/2170	373/19659	0.000226119	0.00343135	0.00287409	1087/1515/3776/363/10004/7380/57817/2348/22953/50506/89958/8170/50617/115019/6557/142680/5745/146894/140453/1828/56302/10568/1579/57216/245972/5030/3710/1364/22802/7010/6513/4582/762/5593/79633/6505/259266/8842/4640/9429/113278/5031/3747/133308/6514/55107/8777/23255/2028/4072/10804/8529/54566/525/11045/140803/53905/286204/222962/27347/6569/5972/154/389015	64
GO:0008076	CC	GO:0008076	voltage-gated potassium channel complex	22/2170	90/19659	0.000246459	0.00364879	0.00305622	27012/3776/170850/10021/3757/3746/219527/389816/3754/3780/57628/3752/6616/3755/3773/440699/23630/3747/27094/3751/3785/3786	22
GO:0099061	CC	GO:0099061	integral component of postsynaptic density membrane	15/2170	51/19659	0.00027948	0.00403916	0.00338318	114798/2895/1128/22986/2902/22865/2903/254263/1949/57622/9123/27092/57689/78999/64101	15
GO:0005796	CC	GO:0005796	Golgi lumen	24/2170	103/19659	0.00028752	0.00405872	0.00339957	8074/143662/7477/1634/7476/140453/1668/2158/4582/221914/50512/10071/4958/4320/176/118430/3972/8858/4969/2719/10675/2239/4323/727897	24
GO:0046658	CC	GO:0046658	anchored component of plasma membrane	16/2170	58/19659	0.000397294	0.00547258	0.00458381	1946/2348/53942/1272/80329/221914/57127/83639/762/80328/100133941/11181/2619/2719/2239/84628	16
GO:0005581	CC	GO:0005581	collagen trimer	21/2170	87/19659	0.00040571	0.00547258	0.00458381	2220/1280/8685/8547/10584/147372/84570/131873/338761/255631/1298/4153/1634/390664/114899/169044/340267/1288/115908/10882/1302	21
GO:0062023	CC	GO:0062023	collagen-containing extracellular matrix	57/2170	332/19659	0.000476075	0.00628212	0.00526188	5644/1280/80760/655/131873/80070/1946/255631/1298/5199/333/1634/27283/140453/1893/1404/401138/80144/4318/7148/340267/5340/4684/221914/2662/8404/1805/4693/22915/4958/4237/6277/6422/255743/3263/176/1842/2254/1288/1311/81621/1/5270/7057/115908/9510/4969/2192/1302/284217/954/2719/4239/2239/2243/2244/7078	57
GO:0099146	CC	GO:0099146	intrinsic component of postsynaptic density membrane	15/2170	54/19659	0.000551373	0.00712092	0.00596446	114798/2895/1128/22986/2902/22865/2903/254263/1949/57622/9123/27092/57689/78999/64101	15
GO:0000780	CC	GO:0000780	condensed nuclear chromosome, centromeric region	9/2170	24/19659	0.0006651	0.00841074	0.00704481	1058/9212/5347/83540/891/701/699/10403/79172	9
GO:0032590	CC	GO:0032590	dendrite membrane	12/2170	40/19659	0.0009192	0.0111626	0.00934973	2555/23109/24141/2556/6870/2566/3746/4355/3208/3747/23710/5967	12
GO:0005833	CC	GO:0005833	hemoglobin complex	6/2170	12/19659	0.000919487	0.0111626	0.00934973	3046/3043/3045/3042/3049/3040	6
GO:0032589	CC	GO:0032589	neuron projection membrane	15/2170	57/19659	0.00102224	0.0121667	0.0101908	2555/23109/24141/2556/6870/2566/3746/4355/6506/3208/3747/134/3767/23710/5967	15
GO:0043025	CC	GO:0043025	neuronal cell body	75/2170	483/19659	0.00143843	0.0167909	0.014064	6750/1393/7345/1129/6530/339479/3623/2823/1515/3776/4885/2044/84152/1821/3781/1501/22953/23109/55273/6870/3359/5798/56896/124925/2898/51083/3746/3798/1813/5816/2026/3780/6623/22974/5979/3752/6770/5126/3710/92737/8001/80023/6323/680/7804/7054/429/3208/5309/5274/29108/6716/54407/1723/57282/29850/1741/6863/3747/134/2752/140767/58157/9900/3767/478/3751/2173/1728/793/9751/246213/60482/6276/5967	75
GO:0060076	CC	GO:0060076	excitatory synapse	13/2170	48/19659	0.00163378	0.0187114	0.0156726	2895/2891/794/22871/3675/6857/2902/1496/9123/392617/440279/246213/64101	13
GO:0044306	CC	GO:0044306	neuron projection terminus	27/2170	138/19659	0.00219069	0.0246249	0.0206258	1393/7345/1129/4922/3776/5798/23025/2898/3746/1128/1813/29993/6857/2571/2902/114131/7054/5582/8492/3747/134/2752/440279/10874/793/1756/246213	27
GO:0034707	CC	GO:0034707	chloride channel complex	13/2170	50/19659	0.00243718	0.0268977	0.0225294	2555/57348/2556/2569/2566/2568/9022/1188/1364/8001/55879/55107/7439	13
GO:0043679	CC	GO:0043679	axon terminus	24/2170	120/19659	0.00277491	0.0297808	0.0249443	1393/1129/4922/3776/5798/23025/2898/3746/1128/1813/29993/2571/2902/114131/7054/5582/8492/3747/134/2752/440279/10874/793/246213	24
GO:0000922	CC	GO:0000922	spindle pole	29/2170	154/19659	0.00279655	0.0297808	0.0249443	991/9212/5347/1068/284403/891/147872/9787/4751/990/22974/1063/10460/150468/9055/3832/4085/79000/259266/1780/9735/10615/994/29899/23255/84722/151393/54908/644943	29
GO:0043235	CC	GO:0043235	receptor complex	62/2170	396/19659	0.00291436	0.0305003	0.025547	7433/2555/285220/2895/2891/2044/139760/22953/118427/2556/3359/799/2569/386617/3977/2898/2566/2568/5745/7301/22871/284656/3675/4486/5979/2690/2902/3710/55584/53831/64109/55879/7010/3691/7804/3694/2674/2903/255743/254263/2049/2911/9429/3696/1741/3680/2904/3953/26050/1144/780/27092/915/3561/2051/1134/5787/926/269/3645/154/4916	62
GO:0045171	CC	GO:0045171	intercellular bridge	14/2170	57/19659	0.0030043	0.0309087	0.025889	55165/24137/9493/55143/2944/10112/22974/668/2949/285643/80263/8317/84628/22994	14
GO:0016342	CC	GO:0016342	catenin complex	9/2170	29/19659	0.00306007	0.0309577	0.0259301	1008/1016/64405/1007/1015/1010/28513/1004/64403	9
GO:0005874	CC	GO:0005874	microtubule	64/2170	414/19659	0.00341283	0.0339605	0.0284452	7278/1393/79861/112714/332/147700/11004/51308/9212/6288/5347/200162/146909/220134/24137/3798/9576/9493/81930/3833/55567/221150/983/56992/827/51512/4751/10112/22974/10381/9055/3832/1062/57159/3925/284076/51203/283987/347688/259266/1780/9928/1769/23281/283431/6344/29127/285643/85462/1759/347240/9735/10615/124602/51175/84676/23710/3797/9751/84722/151393/10397/55638/51473	64
GO:0022838	MF	GO:0022838	substrate-specific channel activity	101/2025	442/17632	5.75837e-12	1.98447e-09	1.70051e-09	27133/51305/1179/5349/2555/55283/2823/2895/27012/7809/347741/2891/3776/363/170850/3781/10021/22953/57348/89872/3757/2556/83959/3359/2569/8170/2898/115019/2566/3746/8913/338440/2568/8989/219527/389816/3754/89822/1268/55515/9022/56302/3780/79838/3752/2902/57113/366/8911/3710/23416/55584/1188/6616/1364/147798/8001/22802/55879/6323/56660/59285/57156/54714/10060/285242/54207/5138/486/3769/3755/2903/37…	101
GO:0015267	MF	GO:0015267	channel activity	105/2025	467/17632	6.21524e-12	1.98447e-09	1.70051e-09	27133/51305/1179/5349/2555/55283/2823/2895/27012/7809/347741/2891/3776/363/2700/170850/3781/10021/22953/57348/89872/3757/2556/83959/3359/2569/8170/2898/115019/2566/3746/8913/338440/116337/2568/8989/219527/389816/3754/89822/1268/55515/9022/56302/375519/3780/84694/79838/3752/2902/57113/366/8911/3710/23416/55584/1188/6616/1364/147798/8001/22802/55879/6323/56660/59285/57156/54714/10060/285242/54207/5…	105
GO:0022803	MF	GO:0022803	passive transmembrane transporter activity	105/2025	468/17632	7.13151e-12	1.98447e-09	1.70051e-09	27133/51305/1179/5349/2555/55283/2823/2895/27012/7809/347741/2891/3776/363/2700/170850/3781/10021/22953/57348/89872/3757/2556/83959/3359/2569/8170/2898/115019/2566/3746/8913/338440/116337/2568/8989/219527/389816/3754/89822/1268/55515/9022/56302/375519/3780/84694/79838/3752/2902/57113/366/8911/3710/23416/55584/1188/6616/1364/147798/8001/22802/55879/6323/56660/59285/57156/54714/10060/285242/54207/5…	105
GO:0046873	MF	GO:0046873	metal ion transmembrane transporter activity	101/2025	444/17632	7.64727e-12	1.98447e-09	1.70051e-09	55117/6530/27133/169026/11254/51305/55283/2823/27012/3776/170850/3781/10021/6512/57348/3757/83959/2898/3746/8913/6557/142680/8989/219527/389816/3754/89822/1268/55515/6535/56302/10568/7780/3780/495/3752/2902/57113/8911/3710/23416/55584/6580/6616/9152/6323/480/56660/59285/6506/10060/6561/64849/54207/5138/486/3769/201780/9914/6505/8647/3755/2903/284111/3773/6833/6554/7991/57282/6539/29850/117532/440…	101
GO:0048018	MF	GO:0048018	receptor ligand activity	106/2025	478/17632	1.19818e-11	2.48741e-09	2.13149e-09	723961/27302/2658/6750/10584/4922/6289/3623/2980/6374/2249/9723/655/8074/117579/7031/2520/4908/1946/57817/7477/5744/6288/22943/4879/1440/2641/51083/2689/5473/6370/4852/2250/5617/11172/10344/27178/6387/9547/7472/199699/7038/7476/2922/9350/6368/268/3589/84432/257313/10637/258/4828/10911/2248/85480/386653/10371/2662/114131/6358/653/2069/116173/2919/4693/3640/4192/3641/92304/6357/64388/53342/3557/225…	106
GO:0005216	MF	GO:0005216	ion channel activity	97/2025	427/17632	2.17152e-11	3.75673e-09	3.21919e-09	27133/51305/1179/5349/2555/55283/2823/2895/27012/7809/347741/2891/3776/170850/3781/10021/22953/57348/3757/2556/83959/3359/2569/2898/115019/2566/3746/8913/338440/2568/8989/219527/389816/3754/89822/1268/55515/9022/56302/3780/79838/3752/2902/57113/8911/3710/23416/55584/1188/6616/1364/147798/8001/22802/55879/6323/56660/59285/57156/54714/10060/285242/54207/5138/486/3769/3755/2903/3773/6833/5026/29850/…	97
GO:0022836	MF	GO:0022836	gated channel activity	80/2025	351/17632	1.06214e-09	1.575e-07	1.34964e-07	27133/1179/2555/55283/2895/27012/7809/2891/3776/170850/3781/10021/22953/57348/3757/2556/3359/2569/2898/2566/3746/8913/338440/2568/8989/219527/389816/3754/89822/1268/9022/3780/79838/3752/2902/8911/3710/23416/55584/1188/6616/147798/8001/22802/55879/6323/56660/59285/57156/54714/285242/54207/3769/3755/2903/3773/6833/5026/29850/117532/440699/23630/1741/3747/6332/2904/11322/55107/1144/27092/3767/27094/…	80
GO:0004497	MF	GO:0004497	monooxygenase activity	34/2025	98/17632	1.28371e-09	1.66561e-07	1.42728e-07	1585/1592/1544/1557/1576/1543/1621/1558/51302/1571/54905/1591/7306/64816/1559/284541/1582/1579/1555/2328/5740/8564/7054/56603/6718/1588/2327/2326/7166/8529/285440/2330/2329/5053	34
GO:0022839	MF	GO:0022839	ion gated channel activity	77/2025	342/17632	3.9e-09	4.49801e-07	3.85439e-07	27133/1179/2555/55283/2895/27012/7809/2891/3776/170850/3781/10021/22953/57348/3757/2556/3359/2569/2898/2566/3746/8913/338440/2568/8989/219527/389816/3754/89822/1268/9022/3780/3752/2902/8911/3710/23416/55584/1188/6616/8001/22802/55879/6323/56660/59285/57156/54714/285242/54207/3769/3755/2903/3773/6833/5026/29850/117532/440699/23630/1741/3747/6332/2904/55107/1144/27092/3767/27094/117144/27112/3751/1…	77
GO:0001228	MF	GO:0001228	DNA-binding transcription activator activity, RNA polymerase II-specific	93/2025	449/17632	8.78757e-09	8.85298e-07	7.58622e-07	54937/8091/8092/5308/10736/6496/3227/2302/3229/256297/3226/4605/2099/4808/57057/2354/157848/1482/5307/3223/58495/11317/56033/3239/4654/2353/6689/8456/222546/1870/1869/11166/1749/1958/5013/402381/1746/6664/3670/3164/7020/5992/8013/6657/64651/4929/1959/3222/3233/2297/3221/5454/7021/79733/6656/367/1820/1761/162979/83881/668/3217/5309/2118/339488/3236/6297/3131/7546/4613/3204/3196/145873/9915/6095/14…	93
GO:0008509	MF	GO:0008509	anion transmembrane transporter activity	74/2025	330/17632	9.38177e-09	8.85298e-07	7.58622e-07	55117/6530/56301/11254/133482/1179/5349/2555/7809/28234/363/6508/6512/338821/57348/2556/4948/83959/2569/115019/2566/9376/338440/6557/2568/142680/6521/9022/6535/10568/6510/366/1188/6580/1364/9152/8001/22802/55879/6513/6506/10060/6561/10599/64849/201780/6505/8647/284111/84879/153201/10998/54407/6554/57282/6539/9122/162515/9123/113278/55089/6514/55107/10227/6540/10246/246213/7439/6567/6569/6528/6542…	74
GO:0005261	MF	GO:0005261	cation channel activity	72/2025	320/17632	1.27954e-08	1.05358e-06	9.02826e-07	27133/51305/55283/2823/27012/347741/2891/3776/170850/3781/10021/22953/3757/83959/3359/2898/3746/8913/8989/219527/389816/3754/89822/1268/55515/56302/3780/3752/2902/57113/8911/3710/23416/55584/6616/6323/56660/59285/57156/54714/10060/285242/54207/5138/3769/3755/2903/3773/6833/5026/29850/117532/440699/23630/3747/6332/2904/55107/1144/27092/3767/27094/117144/27112/3751/1134/3785/3786/140803/80036/7222/…	72
GO:0019825	MF	GO:0019825	oxygen binding	18/2025	36/17632	1.31952e-08	1.05358e-06	9.02826e-07	1592/3046/1557/1576/1543/1571/3043/1582/3045/3042/7054/79747/1588/3049/3040/58157/6999/213	18
GO:0015077	MF	GO:0015077	monovalent inorganic cation transmembrane transporter activity	82/2025	387/17632	2.32602e-08	1.72458e-06	1.47781e-06	55117/6530/27133/11254/51305/27012/347741/3776/170850/3781/10021/6512/3757/170712/83959/50617/2898/3746/6557/142680/219527/389816/3754/89822/55515/6535/10568/3780/495/245972/3752/23416/6580/6616/9152/6323/480/56660/6506/10060/6561/56901/64849/54207/486/3769/201780/9914/6505/8647/3755/284111/153201/3773/6833/6554/57282/6539/29850/440699/23630/6549/3747/133308/6332/341947/3767/27094/478/3751/525/65…	82
GO:0015079	MF	GO:0015079	potassium ion transmembrane transporter activity	43/2025	160/17632	6.12469e-08	4.23828e-06	3.63183e-06	27133/51305/27012/3776/170850/3781/10021/3757/2898/3746/6557/219527/389816/3754/89822/3780/495/3752/23416/6616/480/56660/10060/54207/486/3769/3755/3773/6833/29850/440699/23630/6549/3747/3767/27094/478/3751/3785/3786/285335/284525/389015	43
GO:0015081	MF	GO:0015081	sodium ion transmembrane transporter activity	41/2025	150/17632	7.41031e-08	4.80744e-06	4.11955e-06	55117/6530/11254/10021/6512/83959/2898/6557/142680/55515/6535/10568/495/6580/9152/6323/480/6506/6561/64849/486/201780/6505/8647/284111/6554/57282/6539/29850/6549/133308/6332/478/6540/10246/285335/6569/6528/60482/284525/389015	41
GO:0020037	MF	GO:0020037	heme binding	37/2025	131/17632	1.27103e-07	7.76073e-06	6.65026e-06	1585/1592/3046/1544/1557/1576/1543/1558/50506/51302/1571/54905/1591/79152/64816/1559/3043/284541/1582/1579/3045/1555/3042/5740/5743/56603/79747/1588/3049/3040/58157/4025/8529/6999/53905/847/285440	37
GO:0005179	MF	GO:0005179	hormone activity	35/2025	121/17632	1.4529e-07	8.37841e-06	7.17955e-06	723961/27302/6750/4922/3623/2980/117579/2520/57817/5744/4879/2641/51083/2689/6370/4852/5617/11172/7038/2922/268/257313/4828/10911/114131/3640/3641/7425/3972/1114/2056/3060/5367/3626/6013	35
GO:0015370	MF	GO:0015370	solute:sodium symporter activity	24/2025	72/17632	7.81602e-07	4.27002e-05	3.65902e-05	55117/6530/11254/6512/6557/142680/6535/10568/6580/9152/6506/6561/64849/201780/6505/284111/6554/57282/6539/6540/10246/6569/6528/60482	24
GO:0005267	MF	GO:0005267	potassium channel activity	34/2025	124/17632	8.65507e-07	4.49198e-05	3.84923e-05	27133/51305/27012/3776/170850/3781/10021/3757/2898/3746/219527/389816/3754/89822/3780/3752/23416/6616/56660/10060/54207/3769/3755/3773/6833/29850/440699/23630/3747/3767/27094/3751/3785/3786	34
GO:0046906	MF	GO:0046906	tetrapyrrole binding	37/2025	141/17632	9.4505e-07	4.67125e-05	4.00284e-05	1585/1592/3046/1544/1557/1576/1543/1558/50506/51302/1571/54905/1591/79152/64816/1559/3043/284541/1582/1579/3045/1555/3042/5740/5743/56603/79747/1588/3049/3040/58157/4025/8529/6999/53905/847/285440	37
GO:0016705	MF	GO:0016705	oxidoreductase activity, acting on paired donors, with incorporation or reduction of molecular oxygen	40/2025	161/17632	1.59756e-06	7.53759e-05	6.45904e-05	1585/1592/1544/1557/1576/1543/1621/1558/51302/1571/54905/64714/1591/64816/112399/1559/284541/1582/1579/1555/2328/5740/5743/8564/7054/56603/6718/79831/121506/1588/80312/253982/2327/2326/7166/8529/285440/2330/2329/5053	40
GO:0015291	MF	GO:0015291	secondary active transmembrane transporter activity	50/2025	223/17632	2.29451e-06	0.000103552	8.8735e-05	55117/6530/11254/1015/133482/28234/6508/6512/338821/83959/115019/9376/6557/142680/6521/6535/10568/6510/6580/9152/6506/6561/10599/64849/201780/6505/284111/84879/153201/54407/6554/57282/6539/9122/162515/9123/6549/55089/133308/478/6540/10246/285335/246213/6567/6569/6528/60482/284525/389015	50
GO:0008083	MF	GO:0008083	growth factor activity	40/2025	166/17632	3.62462e-06	0.000152229	0.000130446	27302/2658/3623/2249/655/8074/7031/4908/22943/1440/2689/5473/2250/6387/268/3589/84432/10637/258/2248/2662/653/2069/2919/4693/4192/2254/7425/8190/4909/2253/3565/4969/3626/9048/3592/10675/27329/651/5967	40
GO:0022804	MF	GO:0022804	active transmembrane transporter activity	69/2025	348/17632	3.66639e-06	0.000152229	0.000130446	55117/6530/11254/1015/133482/28234/6508/6512/340273/338821/83959/50617/115019/9376/6557/142680/6521/26154/6535/84239/10568/94160/495/6510/245972/6580/10351/9152/480/6506/10060/6561/10599/64849/486/201780/9914/6505/8647/284111/84879/153201/6833/54407/6554/57282/6539/9122/10350/162515/9429/9123/6549/55089/133308/478/6540/10246/285335/246213/23460/222962/6567/6569/6528/60482/284525/389015/4363	69
GO:0001077	MF	GO:0001077	proximal promoter DNA-binding transcription activator activity, RNA polymerase II-specific	61/2025	298/17632	4.62786e-06	0.000184759	0.000158322	8091/5308/10736/3227/2302/3229/256297/4605/2099/4808/57057/2354/1482/5307/3223/11317/3239/2353/1870/1869/11166/1749/1958/5013/6664/3670/3164/7020/5992/8013/6657/4929/1959/3222/2297/5454/7021/79733/6656/367/162979/83881/668/3217/5309/2118/339488/3131/7546/4613/3204/145873/9915/144455/4602/26257/8022/6943/2299/6659/55897	61
GO:0005343	MF	GO:0005343	organic acid:sodium symporter activity	13/2025	29/17632	6.65577e-06	0.000255877	0.000219264	55117/6512/6535/9152/6506/6561/64849/201780/6505/284111/6554/6539/6540	13
GO:0015293	MF	GO:0015293	symporter activity	35/2025	142/17632	8.45076e-06	0.000313282	0.000268455	55117/6530/11254/6512/83959/6557/142680/6535/10568/6510/6580/9152/6506/6561/64849/201780/6505/284111/84879/153201/54407/6554/57282/6539/9122/162515/9123/55089/6540/10246/246213/6567/6569/6528/60482	35
GO:0008514	MF	GO:0008514	organic anion transmembrane transporter activity	46/2025	209/17632	9.61454e-06	0.000344134	0.000294892	55117/56301/11254/133482/28234/6512/338821/4948/83959/115019/6521/6535/6510/366/9152/6513/6506/6561/10599/64849/201780/6505/8647/284111/84879/153201/10998/54407/6554/57282/6539/9122/162515/9123/113278/55089/6514/10227/6540/10246/246213/7439/6567/6542/11001/4363	46
GO:0043177	MF	GO:0043177	organic acid binding	45/2025	204/17632	1.12565e-05	0.000389475	0.000333745	55576/2172/1592/3046/10894/2348/1621/2572/7130/9227/4099/112399/7350/3043/5105/3045/1404/54658/2571/2902/3042/8001/6401/80765/7054/23569/56603/3161/6505/54659/6898/7298/3049/176/2171/3040/2904/2752/1807/6342/6999/5009/213/54577/212	45
GO:0016709	MF	GO:0016709	oxidoreductase activity, acting on paired donors, with incorporation or reduction of molecular oxygen, NAD(P)H as one donor, and incorporation of one atom of oxygen	15/2025	39/17632	1.28756e-05	0.000414428	0.000355128	1592/1543/1571/284541/1582/1579/2328/8564/56603/6718/2327/2326/8529/2330/2329	15
GO:0005244	MF	GO:0005244	voltage-gated ion channel activity	44/2025	199/17632	1.31754e-05	0.000414428	0.000355128	27133/27012/7809/3776/170850/10021/3757/3746/8913/219527/389816/3754/89822/1268/9022/3752/2902/8911/23416/1188/6616/6323/56660/59285/54207/3769/3755/2903/3773/6833/29850/117532/440699/23630/3747/6332/2904/55107/27092/3767/117144/3751/3785/3786	44
GO:0022832	MF	GO:0022832	voltage-gated channel activity	44/2025	199/17632	1.31754e-05	0.000414428	0.000355128	27133/27012/7809/3776/170850/10021/3757/3746/8913/219527/389816/3754/89822/1268/9022/3752/2902/8911/23416/1188/6616/6323/56660/59285/54207/3769/3755/2903/3773/6833/29850/117532/440699/23630/3747/6332/2904/55107/27092/3767/117144/3751/3785/3786	44
GO:0001653	MF	GO:0001653	peptide receptor activity	36/2025	151/17632	1.4019e-05	0.000427993	0.000366752	6753/7433/84634/339403/114815/887/1394/2696/6870/799/6755/51083/5745/2925/552/4886/22986/10887/2740/53831/4889/680/10886/2834/10803/3000/2692/6344/2859/2984/1910/171389/2358/6752/387129/2840	36
GO:0005125	MF	GO:0005125	cytokine activity	47/2025	219/17632	1.55834e-05	0.000462158	0.000396028	27302/2658/3623/6374/655/1440/5473/6370/10344/27178/6387/9547/7472/7476/9350/6368/3589/10637/85480/386653/2662/6358/653/116173/2919/4693/92304/6357/64388/53342/3557/2056/6375/970/3552/3565/4050/100141515/6696/3626/27190/3592/56477/112744/8600/2920/651	47
GO:0005506	MF	GO:0005506	iron ion binding	36/2025	152/17632	1.6369e-05	0.000471972	0.000404438	1585/1592/53940/1544/1557/1576/1543/1558/51302/1571/54905/1591/79152/64816/316/112399/1559/55586/284541/59344/1582/1579/1555/242/5740/7054/56603/1588/3049/80312/3040/247/7166/8529/285440/5053	36
GO:0048037	MF	GO:0048037	cofactor binding	88/2025	495/17632	1.83952e-05	0.000516061	0.000442218	1585/1592/3046/1544/1557/1576/1543/1621/1558/50506/51302/127/2572/1571/54905/1591/2539/1491/79152/51166/64816/316/112399/1559/2944/3043/284541/1582/1579/3045/2571/1555/2328/440/3042/5740/5743/200407/8564/84129/7054/56603/8435/4329/18/211/64902/339896/2110/79747/6898/7298/36/1588/3049/1723/33/2327/10243/389434/2326/217/3040/4942/9536/53354/54363/6652/58157/220/874/51380/4025/554235/8529/6342/6999/…	88
GO:0000982	MF	GO:0000982	transcription factor activity, RNA polymerase II proximal promoter sequence-specific DNA binding	81/2025	447/17632	1.94232e-05	0.000530561	0.000454644	8091/5308/10736/3227/2302/3229/256297/3642/4605/579/2099/4808/57057/2354/23109/1482/5307/3223/58495/11317/3239/2353/389549/1870/1869/11166/1749/1958/5013/6664/3670/3164/1748/50804/7020/5992/8013/6657/2019/4929/1959/2308/3222/2297/5454/7021/79733/53335/6656/367/162979/84667/83881/668/429/3217/5309/2118/339488/3131/7546/4613/3204/145873/9915/8187/144455/728361/4602/26257/8022/467/6943/5933/23316/69…	81
GO:0008188	MF	GO:0008188	neuropeptide receptor activity	17/2025	50/17632	2.32946e-05	0.000619994	0.00053128	6753/84634/339403/114815/6870/6755/51083/2925/4886/22986/10887/4889/680/10886/2834/6752/387129	17
GO:0001664	MF	GO:0001664	G protein-coupled receptor binding	55/2025	274/17632	2.3928e-05	0.000620933	0.000532084	7345/8685/6374/84870/340419/117579/887/84152/51308/7477/6288/7032/2641/333/51083/5473/6370/4852/10344/6387/2775/9547/7472/552/7476/6368/84432/257313/4828/9630/135138/57402/2781/3691/10886/114131/6358/2919/4693/9454/3640/6422/6357/6863/6375/134/1759/3060/115908/1910/10874/60675/343637/56477/2920	55
GO:0022843	MF	GO:0022843	voltage-gated cation channel activity	34/2025	143/17632	2.5495e-05	0.000645458	0.000553101	27133/27012/3776/170850/10021/3757/3746/8913/219527/389816/3754/1268/3752/2902/8911/23416/6616/59285/3769/3755/2903/3773/6833/117532/440699/23630/3747/2904/27092/3767/117144/3751/3785/3786	34
GO:0005342	MF	GO:0005342	organic acid transmembrane transporter activity	36/2025	156/17632	2.98299e-05	0.00072008	0.000617044	55117/56301/11254/28234/6512/338821/4948/115019/6535/6510/366/9152/6506/6561/10599/64849/201780/6505/8647/284111/84879/153201/10998/54407/6554/6539/9122/162515/9123/55089/6540/10246/246213/6567/6542/11001	36
GO:0046943	MF	GO:0046943	carboxylic acid transmembrane transporter activity	36/2025	156/17632	2.98299e-05	0.00072008	0.000617044	55117/56301/11254/28234/6512/338821/4948/115019/6535/6510/366/9152/6506/6561/10599/64849/201780/6505/8647/284111/84879/153201/10998/54407/6554/6539/9122/162515/9123/55089/6540/10246/246213/6567/6542/11001	36
GO:0015103	MF	GO:0015103	inorganic anion transmembrane transporter activity	36/2025	157/17632	3.44927e-05	0.000813714	0.000697281	6530/1179/5349/2555/7809/363/6508/57348/2556/83959/2569/115019/2566/9376/338440/6557/2568/142680/6521/9022/10568/1188/6580/1364/8001/22802/55879/10060/6561/6505/57282/55107/7439/6569/6528/4363	36
GO:0005249	MF	GO:0005249	voltage-gated potassium channel activity	24/2025	88/17632	3.72963e-05	0.0008603	0.000737201	27133/27012/3776/170850/10021/3757/3746/219527/389816/3754/3752/23416/6616/3769/3755/3773/6833/440699/23630/3747/3767/3751/3785/3786	24
GO:0030414	MF	GO:0030414	peptidase inhibitor activity	39/2025	182/17632	8.23109e-05	0.00185218	0.00158715	26952/5858/10047/80760/27290/6318/10879/332/79444/9232/347365/59082/140832/5276/153218/6317/221476/128817/1469/6692/4018/27344/340267/1447/5973/1472/7021/5274/10653/5266/89932/256394/284293/5270/1470/135228/2719/286204/7078	39
GO:0008528	MF	GO:0008528	G protein-coupled peptide receptor activity	33/2025	145/17632	8.38656e-05	0.00185218	0.00158715	6753/7433/84634/339403/114815/887/2696/6870/799/6755/51083/5745/2925/552/4886/22986/10887/2740/53831/4889/680/10886/2834/10803/2692/6344/2859/1910/171389/2358/6752/387129/2840	33
GO:0005283	MF	GO:0005283	amino acid:sodium symporter activity	8/2025	15/17632	9.10995e-05	0.00197003	0.00168814	55117/6512/6535/9152/6506/6505/6539/6540	8
GO:0005328	MF	GO:0005328	neurotransmitter:sodium symporter activity	11/2025	27/17632	0.000100486	0.00212865	0.00182407	55117/6530/11254/6512/6535/9152/6506/6505/6539/6540/60482	11
GO:0004866	MF	GO:0004866	endopeptidase inhibitor activity	37/2025	175/17632	0.000164959	0.00342455	0.00293453	26952/5858/10047/80760/27290/6318/10879/332/79444/9232/347365/59082/140832/5276/153218/6317/128817/1469/6692/4018/27344/340267/1447/5973/1472/7021/5274/10653/5266/89932/256394/284293/5270/1470/135228/286204/7078	37
GO:0015294	MF	GO:0015294	solute:cation symporter activity	25/2025	103/17632	0.000202985	0.00413134	0.00354019	55117/6530/11254/6512/6557/142680/6535/10568/6580/9152/6506/6561/64849/201780/6505/284111/153201/6554/57282/6539/6540/10246/6569/6528/60482	25
GO:0005230	MF	GO:0005230	extracellular ligand-gated ion channel activity	20/2025	75/17632	0.000224933	0.00449001	0.00384754	2555/2895/2891/22953/2556/3359/2569/2898/2566/2568/2902/55584/8001/55879/285242/2903/5026/2904/1144/1134	20
GO:0005326	MF	GO:0005326	neurotransmitter transporter activity	16/2025	54/17632	0.000254323	0.00498089	0.00426818	55117/6530/11254/6512/6535/6580/9152/55879/6506/6505/153201/6539/204962/6540/246213/60482	16
GO:0031406	MF	GO:0031406	carboxylic acid binding	39/2025	192/17632	0.000268076	0.00515302	0.00441568	55576/2172/1592/10894/2348/1621/2572/7130/9227/4099/112399/7350/5105/1404/54658/2571/2902/8001/6401/80765/7054/23569/56603/3161/6505/54659/6898/7298/176/2171/2904/2752/1807/6342/6999/5009/213/54577/212	39
GO:0005416	MF	GO:0005416	amino acid:cation symporter activity	9/2025	21/17632	0.000275514	0.0051997	0.00445568	55117/6512/6535/9152/6506/6505/153201/6539/6540	9
GO:0016595	MF	GO:0016595	glutamate binding	6/2025	10/17632	0.000317118	0.00557914	0.00478082	2572/2571/2902/6505/2904/2752	6
GO:0016725	MF	GO:0016725	oxidoreductase activity, acting on CH or CH2 groups	6/2025	10/17632	0.000317118	0.00557914	0.00478082	1544/1576/1558/316/1559/6241	6
GO:0017153	MF	GO:0017153	sodium:dicarboxylate symporter activity	6/2025	10/17632	0.000317118	0.00557914	0.00478082	6512/6506/6561/64849/6505/284111	6
GO:0031720	MF	GO:0031720	haptoglobin binding	6/2025	10/17632	0.000317118	0.00557914	0.00478082	3046/3043/3045/3042/3049/3040	6
GO:0015108	MF	GO:0015108	chloride transmembrane transporter activity	24/2025	100/17632	0.000323029	0.0055884	0.00478876	6530/1179/5349/2555/7809/57348/2556/2569/115019/2566/338440/6557/2568/6521/9022/1188/6580/1364/8001/22802/55879/6505/55107/7439	24
GO:0008395	MF	GO:0008395	steroid hydroxylase activity	12/2025	35/17632	0.000336183	0.00572062	0.00490206	1585/1557/1576/1543/1558/51302/1571/54905/1559/1582/1555/1588	12
GO:0003774	MF	GO:0003774	motor activity	30/2025	137/17632	0.000351423	0.00588349	0.00504163	147700/11004/146909/24137/3798/54112/9493/81930/3833/55567/8735/56992/10112/4619/3832/1062/53904/4626/84700/4621/1780/4620/9928/1769/4640/285643/347240/124602/3797/23026	30
GO:0061135	MF	GO:0061135	endopeptidase regulator activity	37/2025	182/17632	0.000373245	0.00609149	0.00521987	26952/5858/10047/80760/27290/6318/10879/332/79444/9232/347365/59082/140832/5276/153218/6317/128817/1469/6692/4018/27344/340267/1447/5973/1472/7021/5274/10653/5266/89932/256394/284293/5270/1470/135228/286204/7078	37
GO:0015238	MF	GO:0015238	drug transmembrane transporter activity	24/2025	101/17632	0.00037831	0.00609149	0.00521987	6530/6512/340273/4948/83959/6535/6510/6580/10351/9152/6506/6561/64849/6505/284111/153201/54407/9429/113278/10227/246213/56918/6542/4363	24
GO:0015276	MF	GO:0015276	ligand-gated ion channel activity	31/2025	144/17632	0.00038732	0.00609149	0.00521987	2555/55283/2895/2891/10021/22953/3757/2556/3359/2569/2898/2566/2568/8989/2902/3710/55584/8001/55879/54714/285242/3769/2903/3773/6833/5026/1741/2904/1144/3767/1134	31
GO:0022834	MF	GO:0022834	ligand-gated channel activity	31/2025	144/17632	0.00038732	0.00609149	0.00521987	2555/55283/2895/2891/10021/22953/3757/2556/3359/2569/2898/2566/2568/8989/2902/3710/55584/8001/55879/54714/285242/3769/2903/3773/6833/5026/1741/2904/1144/3767/1134	31
GO:0005539	MF	GO:0005539	glycosaminoglycan binding	43/2025	222/17632	0.000395701	0.00613041	0.00525321	55576/2249/84870/340419/655/84570/10894/130120/6288/7130/333/57115/1634/6368/1404/5068/4018/7148/54209/50512/3161/8993/4192/6422/26279/176/4316/1842/64388/3491/2254/1311/83998/5270/7057/9510/116519/343637/27329/5967/200879/1833/2160	43
GO:0005344	MF	GO:0005344	oxygen carrier activity	7/2025	14/17632	0.000429829	0.00656122	0.00562238	3046/3043/3045/3042/3049/3040/58157	7
GO:0004745	MF	GO:0004745	retinol dehydrogenase activity	8/2025	18/17632	0.000450783	0.00678134	0.005811	127/201140/126/8608/50700/124/5959/8630	8
GO:0008066	MF	GO:0008066	glutamate receptor activity	10/2025	27/17632	0.00051917	0.00769855	0.00659698	2895/2891/2914/2898/2915/2913/2902/2903/2911/2904	10
GO:0016712	MF	GO:0016712	oxidoreductase activity, acting on paired donors, with incorporation or reduction of molecular oxygen, reduced flavin or flavoprotein as one donor, and incorporation of one atom of oxygen	11/2025	32/17632	0.000577145	0.00843769	0.00723035	1544/1557/1576/1543/1558/1571/54905/64816/1559/1555/1588	11
GO:0005254	MF	GO:0005254	chloride channel activity	19/2025	75/17632	0.000643486	0.00927693	0.0079495	1179/5349/2555/7809/57348/2556/2569/115019/2566/338440/2568/9022/1188/1364/8001/22802/55879/55107/7439	19
GO:0005544	MF	GO:0005544	calcium-dependent phospholipid binding	15/2025	53/17632	0.00067459	0.00946249	0.00810851	341359/143425/90019/57586/255189/27445/6857/283748/131034/151835/312/8448/11199/27132/123745	15
GO:0008028	MF	GO:0008028	monocarboxylic acid transmembrane transporter activity	15/2025	53/17632	0.00067459	0.00946249	0.00810851	28234/338821/10599/201780/8647/84879/10998/6554/6539/9122/162515/9123/6540/6567/11001	15
GO:1901618	MF	GO:1901618	organic hydroxy compound transmembrane transporter activity	13/2025	44/17632	0.00097378	0.0134771	0.0115487	6530/28234/338821/89872/366/6580/64220/10599/201780/8647/6554/9123/10227	13
GO:0003777	MF	GO:0003777	microtubule motor activity	20/2025	84/17632	0.00109354	0.0149355	0.0127984	147700/11004/146909/24137/3798/9493/81930/3833/55567/56992/10112/3832/1062/1780/9928/1769/285643/347240/124602/3797	20
GO:0022824	MF	GO:0022824	transmitter-gated ion channel activity	16/2025	61/17632	0.00112313	0.0149463	0.0128076	2555/2895/2891/2556/3359/2569/2898/2566/2902/55584/8001/285242/2903/2904/1144/1134	16
GO:0022835	MF	GO:0022835	transmitter-gated channel activity	16/2025	61/17632	0.00112313	0.0149463	0.0128076	2555/2895/2891/2556/3359/2569/2898/2566/2902/55584/8001/285242/2903/2904/1144/1134	16
GO:0008391	MF	GO:0008391	arachidonic acid monooxygenase activity	7/2025	16/17632	0.00116361	0.0150885	0.0129295	1557/1558/1571/1559/1579/1555/8529	7
GO:0008392	MF	GO:0008392	arachidonic acid epoxygenase activity	7/2025	16/17632	0.00116361	0.0150885	0.0129295	1557/1558/1571/1559/1579/1555/8529	7
GO:0061134	MF	GO:0061134	peptidase regulator activity	41/2025	220/17632	0.00117742	0.0150885	0.0129295	26952/5858/10047/80760/27290/6318/10879/332/79444/9232/347365/59082/140832/5276/153218/6317/221476/128817/1469/6692/4018/27344/340267/1447/5973/1472/7021/5274/10653/29108/5266/89932/256394/284293/5270/1470/2192/135228/2719/286204/7078	41
GO:0017046	MF	GO:0017046	peptide hormone binding	14/2025	51/17632	0.00139824	0.0176465	0.0151215	1393/7433/887/1394/2696/799/5745/552/2690/2740/2692/6344/3953/1910	14
GO:0005201	MF	GO:0005201	extracellular matrix structural constituent	31/2025	155/17632	0.00141104	0.0176465	0.0151215	1280/84570/131873/255631/1298/1634/140453/1893/1404/169044/258/80144/7148/340267/1805/22915/4237/255743/176/1288/1311/7057/115908/4969/2192/1302/284217/4239/2243/2244/1116	31
GO:0030594	MF	GO:0030594	neurotransmitter receptor activity	25/2025	117/17632	0.00151534	0.0186589	0.015989	1129/3358/2555/2895/2891/1812/2556/3359/3357/2569/2898/2566/2915/1128/1813/2902/55584/8001/285242/2903/2911/134/2904/1144/1134	25
GO:0015645	MF	GO:0015645	fatty acid ligase activity	8/2025	21/17632	0.00152794	0.0186589	0.015989	54988/6296/23305/2180/10998/51703/123876/11001	8
GO:0004601	MF	GO:0004601	peroxidase activity	14/2025	52/17632	0.00171433	0.0202685	0.0173683	3046/50506/3043/3045/3042/5743/3049/389434/3040/2954/4025/53905/2882/847	14
GO:0008146	MF	GO:0008146	sulfotransferase activity	14/2025	52/17632	0.00171433	0.0202685	0.0173683	9348/90161/442038/64579/9514/25830/27284/10090/9951/23563/6819/9953/6822/222537	14
GO:0016405	MF	GO:0016405	CoA-ligase activity	9/2025	26/17632	0.00171834	0.0202685	0.0173683	54988/6296/23305/2180/10998/51703/123876/84532/11001	9
GO:0016614	MF	GO:0016614	oxidoreductase activity, acting on CH-OH group of donors	27/2025	132/17632	0.00197804	0.0230698	0.0197687	127/125/2539/201140/3290/27294/55586/284541/126/8608/130/50700/124/6718/5959/6716/1962/3614/54363/8630/6652/874/8529/22977/2819/137872/197257	27
GO:0005496	MF	GO:0005496	steroid binding	20/2025	89/17632	0.00230753	0.0266135	0.0228054	1576/2099/64714/319/3290/54658/6770/80765/367/8435/6718/1071/8842/54852/6095/478/116519/6342/793/6462	20
GO:0016616	MF	GO:0016616	oxidoreductase activity, acting on the CH-OH group of donors, NAD or NADP as acceptor	25/2025	121/17632	0.0024666	0.0281356	0.0241097	127/125/2539/201140/3290/27294/55586/284541/126/8608/130/50700/124/6718/5959/6716/1962/3614/8630/6652/874/22977/2819/137872/197257	25
GO:0008009	MF	GO:0008009	chemokine activity	13/2025	49/17632	0.00285198	0.0321778	0.0275735	6374/5473/6370/10344/6387/9547/6368/6358/2919/6357/6375/56477/2920	13
GO:0043138	MF	GO:0043138	3'-5' DNA helicase activity	6/2025	14/17632	0.00301615	0.0331764	0.0284292	8318/9837/9401/641/51659/84296	6
GO:0043142	MF	GO:0043142	single-stranded DNA-dependent ATPase activity	6/2025	14/17632	0.00301615	0.0331764	0.0284292	5888/80119/10721/5984/63922/79075	6
GO:0042165	MF	GO:0042165	neurotransmitter binding	14/2025	55/17632	0.00303637	0.0331764	0.0284292	1393/3358/1394/3359/3357/2902/8001/6539/2904/1144/6540/1134/212/60482	14
GO:0016701	MF	GO:0016701	oxidoreductase activity, acting on single donors with incorporation of molecular oxygen	9/2025	28/17632	0.00307239	0.0332202	0.0284667	83875/84842/55586/59344/242/5743/3242/247/6999	9
GO:0042562	MF	GO:0042562	hormone binding	22/2025	104/17632	0.0032116	0.0343674	0.0294498	1393/7433/887/1394/2696/799/5315/5745/552/2690/2740/367/2692/6344/3953/1144/220/1910/478/1134/269/6462	22
GO:0016684	MF	GO:0016684	oxidoreductase activity, acting on peroxide as acceptor	14/2025	56/17632	0.00362879	0.0384356	0.0329359	3046/50506/3043/3045/3042/5743/3049/389434/3040/2954/4025/53905/2882/847	14
GO:0015171	MF	GO:0015171	amino acid transmembrane transporter activity	17/2025	74/17632	0.0037337	0.038616	0.0330905	55117/56301/11254/6512/4948/6535/6510/9152/6506/6505/153201/54407/6539/55089/6540/246213/6542	17
GO:0001972	MF	GO:0001972	retinoic acid binding	7/2025	19/17632	0.00375744	0.038616	0.0330905	1592/9227/54658/56603/54659/2171/54577	7
GO:0005003	MF	GO:0005003	ephrin receptor activity	7/2025	19/17632	0.00375744	0.038616	0.0330905	285220/2044/284656/1949/2049/2051/4916	7
GO:0071855	MF	GO:0071855	neuropeptide receptor binding	9/2025	29/17632	0.00400768	0.0407841	0.0349483	887/51083/4852/2775/4828/114131/6863/3060/10874	9
GO:0099094	MF	GO:0099094	ligand-gated cation channel activity	22/2025	106/17632	0.00409755	0.0412938	0.0353851	55283/2891/10021/22953/3757/3359/2898/8989/2902/3710/55584/54714/285242/3769/2903/3773/6833/5026/2904/1144/3767/1134	22
GO:0050662	MF	GO:0050662	coenzyme binding	48/2025	285/17632	0.00417236	0.0416434	0.0356847	1621/127/2572/2539/1491/51166/316/112399/2571/2328/8564/84129/7054/8435/4329/18/211/64902/339896/2110/6898/36/1723/33/2327/10243/389434/2326/217/4942/53354/54363/6652/220/874/51380/554235/6342/53905/213/212/847/2330/2819/11162/2329/197257/34	48
GO:0034483	MF	GO:0034483	heparan sulfate sulfotransferase activity	6/2025	15/17632	0.00454276	0.0449085	0.0384826	9348/90161/64579/9951/9953/222537	6
GO:0005501	MF	GO:0005501	retinoid binding	10/2025	35/17632	0.00479321	0.0469373	0.0402211	1592/127/5948/9227/54658/64220/56603/54659/2171/54577	10
GO:0004867	MF	GO:0004867	serine-type endopeptidase inhibitor activity	20/2025	95/17632	0.00509883	0.0494634	0.0423858	5858/80760/27290/6318/347365/140832/5276/153218/6317/6692/27344/340267/5274/10653/5266/89932/256394/284293/5270/135228	20
GO:0016878	MF	GO:0016878	acid-thiol ligase activity	9/2025	30/17632	0.00515136	0.0494693	0.0423908	54988/6296/23305/2180/10998/51703/123876/84532/11001	9
GO:0005126	MF	GO:0005126	cytokine receptor binding	47/2025	281/17632	0.00519475	0.0494693	0.0423908	27302/2658/3623/6374/655/4908/1946/1440/7032/3977/2689/5473/6370/5617/10344/27178/6387/9547/6368/1893/268/8835/3589/10637/85480/386653/57402/2662/6358/653/2919/29108/6357/3557/2056/6375/970/3552/3565/4050/3626/3592/56477/112744/8600/2920/651	47
